# Supplementary material for: Enantioselective synthesis of spirooxindole-pyran derivatives via a remote inverse-electron-demand Diels–Alder reaction of β,γ-unsaturated amides
Source: Royal Society of Chemistry journal article supplement (doi:10.1039/d4ob00303a), 2024-01-01
Supplement: d4ob00303a1.pdf [file d4ob00303a1.pdf]

## Supporting Information

# Enantioselective synthesis of spirooxindole-pyran derivatives via remote Inverse-Electron-Demand Diels–Alder reaction of $\beta,\gamma$ -unsaturated amides

Yuzhen Chen,<sup>a</sup> Jiajia Chen,<sup>b</sup> Lin Zhong,<sup>b</sup> Yili Zhang,<sup>b</sup> Ruoting Zhan,<sup>b</sup> Huicai Huang\*<sup>b</sup> and Yongbo Xue\*<sup>a</sup>

<sup>a</sup>School of Pharmaceutical Sciences (Shenzhen), Shenzhen Campus of Sun Yat-sen University, Shenzhen 518107, People's Republic of China.

Email: xueyb@mail.sysu.edu.cn

<sup>b</sup>Key Laboratory of Chinese Medicinal Resource from Lingnan, Ministry of Education, School of Pharmaceutical Sciences, Guangzhou University of Chinese Medicine, Guangzhou 510006, People's Republic of China.

Email: huanghc@gzucm.edu.cn

## Table of Contents

|                                                                |    |
|----------------------------------------------------------------|----|
| I. General Information. ....                                   | 2  |
| II. Preparation of substrates.....                             | 3  |
| III. Reaction conditions optimization .....                    | 4  |
| IV. General procedure and the derivatizations of product. .... | 6  |
| V. X-ray crystallographic analysis. ....                       | 8  |
| VI. Characterization data.....                                 | 12 |
| VII. <sup>1</sup> H NMR and <sup>13</sup> C NMR spectra.....   | 29 |
| VIII. HPLC Charts of products.....                             | 68 |

## **I. General information.**

Proton nuclear magnetic resonance ( $^1\text{H}$  NMR) spectra and carbon nuclear magnetic resonance ( $^{13}\text{C}$  NMR) spectra were recorded on a Bruker AV-400 spectrometer (400 MHz and 100 MHz). Chemical shifts for protons are reported in parts per million downfield from tetramethylsilane and are referenced to residual protium in the NMR solvent ( $\text{CDCl}_3$ : 7.26). Chemical shifts for carbon are reported in parts per million downfield from tetramethylsilane and are referenced to the carbon resonances of the solvent ( $\text{CDCl}_3$ : 77.16). Data are represented as follows: chemical shift, integration, multiplicity (br = broad, s = singlet, d = doublet, t = triplet, q = quartet, m = multiplet), coupling constants in Hertz (Hz). High resolution mass spectra (EI) were measured on a Waters Micromass GCT spectrometer. High resolution mass spectrometry (ESI) were carried out using a Waters Quatro Macro triple quadrupole mass spectrometer. Optical rotations were measured on an Autopol III automatic polarimeter (Rudolph Research analytical). High performance liquid chromatography (HPLC) was performed on an Agilent 1200 Series chromatographs using chiral columns (DAICEL CHIRALPAK) as noted. All solvents and reagents were purchased from commercial sources (Adamas-beta) and used without purification unless otherwise noted.

## II. Preparation of substrates.

1.  $\beta,\gamma$ -unsaturated pyrazolamide **1** were synthesized follow literature procedure.<sup>1,2</sup>
2. N-protect isatin-derived oxodiene **2** were synthesized by the combination of literature procedure.<sup>3</sup>

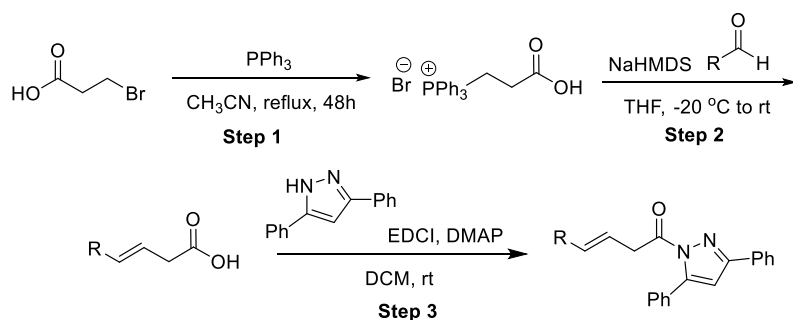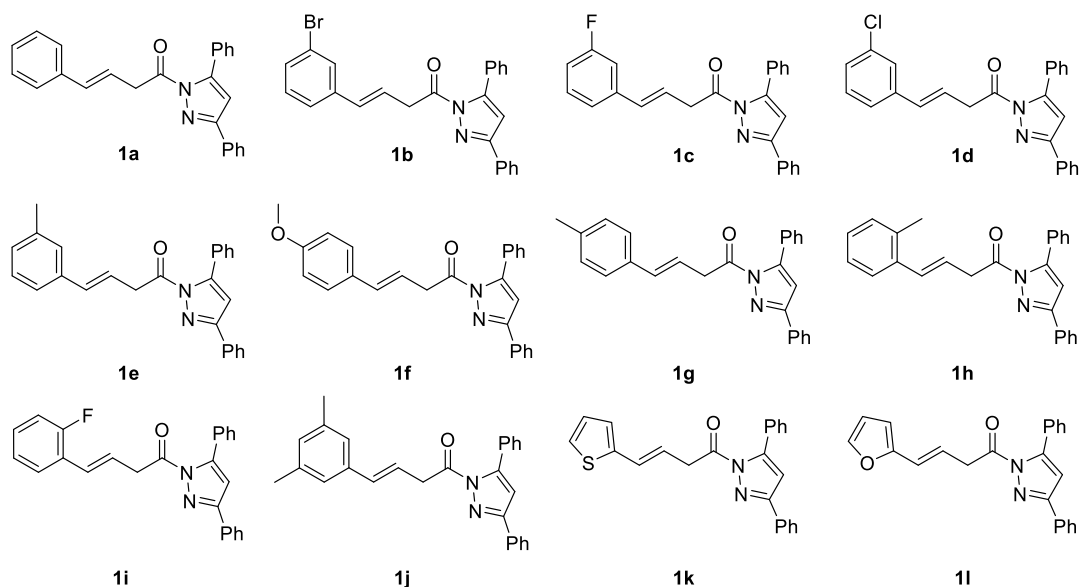

**Step 1:** To an oven-dried 50 mL Schlenk flask equipped with a stir bar and Graham condenser was added  $\text{PPh}_3$  (2.62 g, 10 mmol). The flask was evacuated and back-filled with nitrogen. Next, bromide (10 mmol) and anhydrous MeCN (10 mL) was subsequently added via syringe. The homogeneous mixture was stirred at reflux for 36 h. The resulting colorless solution was cooled to room temperature and then  $\text{Et}_2\text{O}$  (30 mL) as added. After keeping at  $-20\text{ }^\circ\text{C}$  for 4 h, the formed precipitate was filtered, washed with  $\text{Et}_2\text{O}$  (20 mL  $\times$  3), and dried *in vacuo* to afford the triphenylphosphonium bromide as a white solid.

**Step 2:** To an oven-dried 50 mL Schlenk flask with a stir bar was charged with triphenylphosphonium bromide (10 mmol). The flask was evacuated and back-filled with nitrogen. Then, 20 mL anhydrous THF was added via syringe and the suspension was cooled to  $-20\text{ }^\circ\text{C}$ . To the colorless suspension was added NaHMDS (2.5 M in THF) (8.8 mL, 22 mmol) dropwise via syringe over 5 min. The resulting orange solution was stirred at  $-20\text{ }^\circ\text{C}$  for 30 min and became homogeneous gradually. Then a solution

of phenylpropyl aldehyde (1.19 mL, 9 mmol) in 2 mL anhydrous THF was added via syringe at  $-20\text{ }^{\circ}\text{C}$ . The resulting mixture was allowed to warm to room temperature and stirred overnight, after which the heterogeneous mixture was quenched with  $\text{H}_2\text{O}$  (50 mL) and washed with DCM (50 mL  $\times$  2). The aqueous phase was acidified to pH = 1 by aqueous 1M HCl solution, and then extracted with EtOAc (60 mL  $\times$  3). The organic extracts were dried over anhydrous  $\text{Na}_2\text{SO}_4$ , filtered and concentrated in vacuo. The residue was purified by silica gel column chromatography to afford the desired alkenoic acid. The trans-styrylacetic acid is commercially available.

**Step 3:** To the mixture of carboxylic acid (10.0 mmol, 1.0 equiv.) and 3,5-diphenylpyrazole (2.19 g, 10 mmol, 1.0 equiv) in 20 mL dry Dichloromethane was added EDCI (2.11g, 11 mmol, 1.1 equiv.) and a small amount of DMAP at rt. Then the mixture was stirred at rt for 1 h. After removal of solvent under reduced pressure, the crude was purified by silica gel column chromatography (hexane/ethyl acetate = 50/1) to afford desired *N*-acylpyrazole.

## References

1. Liu, X.; An, R.; Zhang, X.; Luo, J.; Zhao, X. *Angew. Chem. Int. Ed.* **2016**, *55*, 5846.
2. Zhang, H.-J.; Shi, C.-Y.; Zhong, F.; Yin, L. *J. Am. Chem. Soc.* **2017**, *139*, 2196.
3. He, X.-L.; Zhao, H.-R.; Duan, C.-Q.; Du, W.; Chen, Y.-C. *Org. Lett.* **2018**, *20*, 804.

## III. Reaction conditions optimization

Table S1. Screening data of Diels–Alder Reaction.

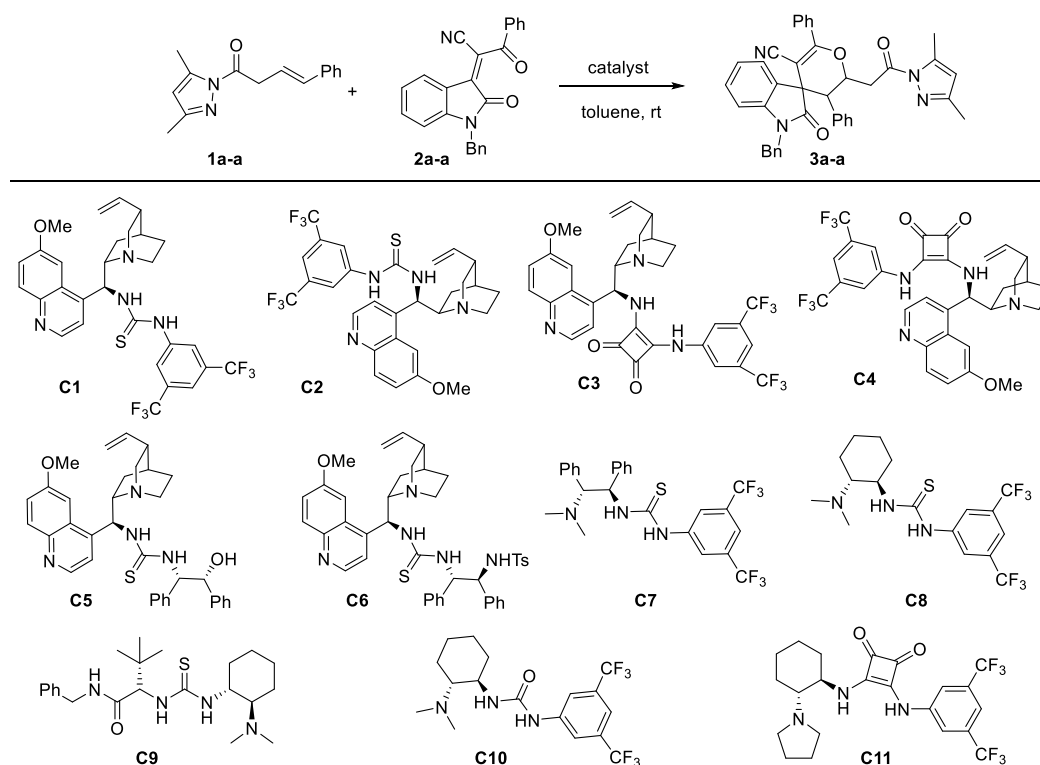

| entry           | catalyst   | solvent                         | t (h) | yield (%) <sup>b</sup> | d.r. <sup>c</sup> | ee (%) <sup>d</sup> |
|-----------------|------------|---------------------------------|-------|------------------------|-------------------|---------------------|
| 1               | <b>C1</b>  | Toluene                         | 24    | 99                     | >20:1             | 19                  |
| 2               | <b>C2</b>  | Toluene                         | 24    | 80                     | >20:1             | -41                 |
| 3               | <b>C3</b>  | Toluene                         | 24    | 23                     | >20:1             | 70                  |
| 4               | <b>C4</b>  | Toluene                         | 24    | 99                     | >20:1             | -47                 |
| 5               | <b>C5</b>  | Toluene                         | 24    | 60                     | >20:1             | 77                  |
| 6               | <b>C6</b>  | Toluene                         | 48    | 26                     | >20:1             | 67                  |
| 7               | <b>C7</b>  | Toluene                         | 24    | 83                     | >20:1             | -13                 |
| 8               | <b>C8</b>  | Toluene                         | 24    | 58                     | >20:1             | -11                 |
| 9               | <b>C9</b>  | Toluene                         | 24    | 37                     | >20:1             | -41                 |
| 10              | <b>C10</b> | Toluene                         | 24    | 59                     | >20:1             | -38                 |
| 11              | <b>C11</b> | Toluene                         | 24    | 38                     | >20:1             | -17                 |
| 12              | <b>C5</b>  | CH <sub>2</sub> Cl <sub>2</sub> | 24    | 40                     | >20:1             | 57                  |
| 13              | <b>C5</b>  | CHCl <sub>3</sub>               | 24    | 54                     | >20:1             | 65                  |
| 14              | <b>C5</b>  | EtOAc                           | 24    | 80                     | >20:1             | 65                  |
| 15              | <b>C5</b>  | cyclohexane                     | 24    | 52                     | >20:1             | 33                  |
| 16              | <b>C5</b>  | PhCl                            | 24    | 61                     | >20:1             | 74                  |
| 17              | <b>C5</b>  | PhCF <sub>3</sub>               | 24    | 86                     | >20:1             | 65                  |
| 18              | <b>C5</b>  | THF                             | 24    | No reaction            | /                 | /                   |
| 19 <sup>e</sup> | <b>C5</b>  | Toluene                         | 60    | 80                     | >20:1             | 75                  |
| 20 <sup>f</sup> | <b>C5</b>  | Toluene                         | 72    | 84                     | >20:1             | 75                  |

<sup>a</sup>Unless otherwise noted, the reactions were performed with 1.0 equiv of **1a-a** (0.06 mmol), 1.2 equiv of **2a-a** (0.05 mmol), catalyst **C** (10 mol %) in 1.0 mL solvent at rt. <sup>b</sup>Yield of the isolated product. <sup>c</sup>The dr was determined by <sup>1</sup>H NMR analysis of the crude product. <sup>d</sup>Determined by chiral HPLC analysis. <sup>e</sup>The reaction was performed at 10 °C. <sup>f</sup>Catalyst **C5** (15 mol%) was used in the reaction and performed at 10 °C. <sup>e</sup> The reaction was performed at 0 °C. <sup>f</sup> The reaction was performed at -10 °C.

Table S2. The screening conditions of Diels–Alder Reaction<sup>a</sup>

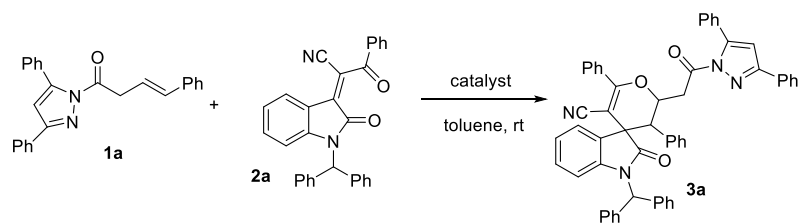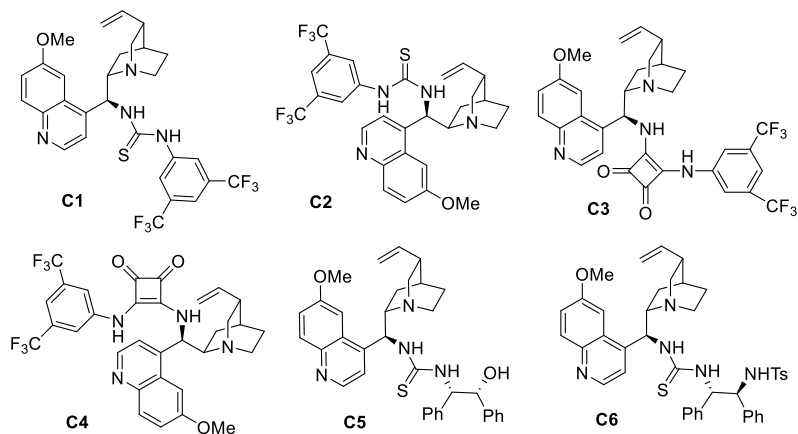

| entry | catalyst  | temp   | solvent                         | t (h) | yield (%) <sup>b</sup> | d.r. <sup>c</sup> | ee (%) <sup>d</sup> |
|-------|-----------|--------|---------------------------------|-------|------------------------|-------------------|---------------------|
| 1     | <b>C1</b> | rt     | Toluene                         | 12    | 76                     | >20:1             | -20                 |
| 2     | <b>C2</b> | rt     | Toluene                         | 12    | 79                     | >20:1             | -9                  |
| 3     | <b>C3</b> | rt     | Toluene                         | 12    | 32                     | >20:1             | 83                  |
| 4     | <b>C4</b> | rt     | Toluene                         | 12    | trace                  | /                 | /                   |
| 5     | <b>C5</b> | rt     | Toluene                         | 24    | 61                     | >20:1             | 85                  |
| 6     | <b>C6</b> | rt     | Toluene                         | 24    | 60                     | >20:1             | 84                  |
| 7     | <b>C6</b> | rt     | CH <sub>2</sub> Cl <sub>2</sub> | 48    | 35                     | >20:1             | 81                  |
| 8     | <b>C6</b> | rt     | CHCl <sub>3</sub>               | 48    | trace                  | /                 | /                   |
| 9     | <b>C6</b> | rt     | THF                             | 48    | No reaction            | /                 | /                   |
| 9     | <b>C6</b> | rt     | Et <sub>2</sub> O               | 48    | 65                     | >20:1             | 79                  |
| 9     | <b>C6</b> | rt     | PhCl                            | 48    | 52                     | >20:1             | 85                  |
| 10    | <b>C6</b> | rt     | PhCF <sub>3</sub>               | 48    | 81                     | >20:1             | 86                  |
| 11    | <b>C6</b> | 10 °C  | PhCF <sub>3</sub>               | 12    | 93                     | >20:1             | 87                  |
| 12    | <b>C6</b> | 0 °C   | PhCF <sub>3</sub>               | 36    | 98                     | >20:1             | 93                  |
| 13    | <b>C6</b> | -10 °C | PhCF <sub>3</sub>               | 48    | 96                     | >20:1             | 92                  |
| 14    | <b>C6</b> | -20 °C | PhCF <sub>3</sub>               | 96    | 53                     | >20:1             | 96                  |

<sup>a</sup>Unless otherwise noted, the reactions were performed with 1.0 equiv of **1a** (0.06 mmol), 1.2 equiv of **2a** (0.05 mmol), catalyst **C** (10 mol %) in 1.0 mL solvent at rt. <sup>b</sup>Yield of the isolated product. <sup>c</sup>The dr was determined by <sup>1</sup>H NMR analysis of the crude product. <sup>d</sup>Determined by chiral HPLC analysis.

#### IV. General procedure and the derivatizations of product.

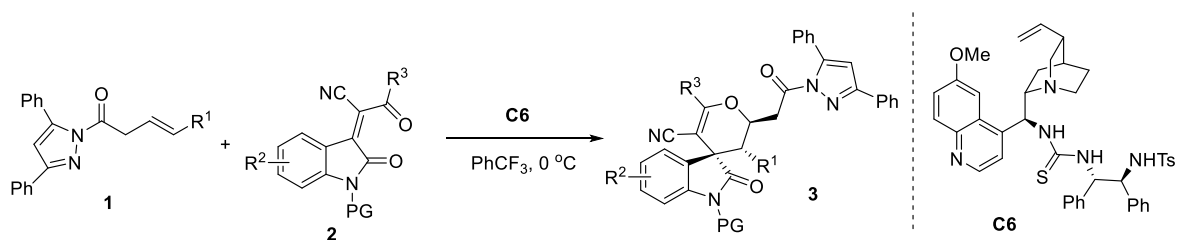

Step 1: PhCF<sub>3</sub> (2.0 mL) was added to a mixture of isatin-derived oxodiene **2** (0.10 mmol, 1.0 equiv),  $\beta,\gamma$ -unsaturated amides **1** (0.12 mmol, 1.2 equiv) and catalyst **C6** (7.3 mg, 0.010 mmol) at 0 °C and the reaction was stirred for 72h. Then mixture was directly loaded onto the flash column chromatography and was purified with CH<sub>2</sub>Cl<sub>2</sub>-hexane (1:1) to afford **3** as white solids.

#### Procedures for the derivatizations of product.

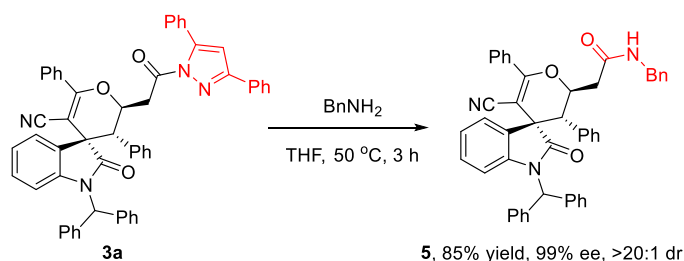

**3a** (80.5 mg, 0.10 mmol) in THF (2.0 mL), then BnNH<sub>2</sub> (21.4 mg, 0.2 mmol) was added and the mixture was stirred at 50 °C (bath oil) for 3 h. Then the solvent was removed under reduced pressure and the residue was purified by flash chromatography to give the product **5** (58.9 mg, white solids, 85% yield).

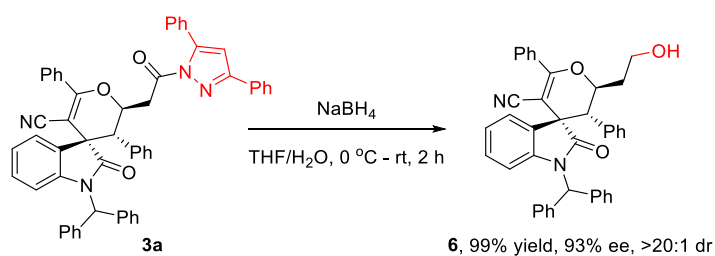

**3a** (80.5 mg, 0.10 mmol) in THF/H<sub>2</sub>O (1.54 mL/0.42 mL), then NaBH<sub>4</sub> (30.26 mg, 0.8 mmol) was added in the 0 °C and the resulting mixture was stirred at rt for 2 h. Then the mixture was quenched by 1N HCl (10 mL), extracted with DCM (20 mL). The solvent was removed under reduced pressure and the residue was purified by flash chromatography to give the product **6** (58.5 mg, white solids, 99% yield).

## V. X-ray crystallographic analysis of 4h.

The single crystal of compound **4j** was prepared from its solution in Dichloromethane/ n-hexane (1:10) by slow evaporation of the solvent (Figure S and Table 1).

CCDC 2074766 (**4j**) contain the supplementary crystallographic data for this paper. These data can be obtained free of charge from The Cambridge Crystallographic Centre via [www.ccdc.cam.ac.uk/data\\_request/cif](http://www.ccdc.cam.ac.uk/data_request/cif).

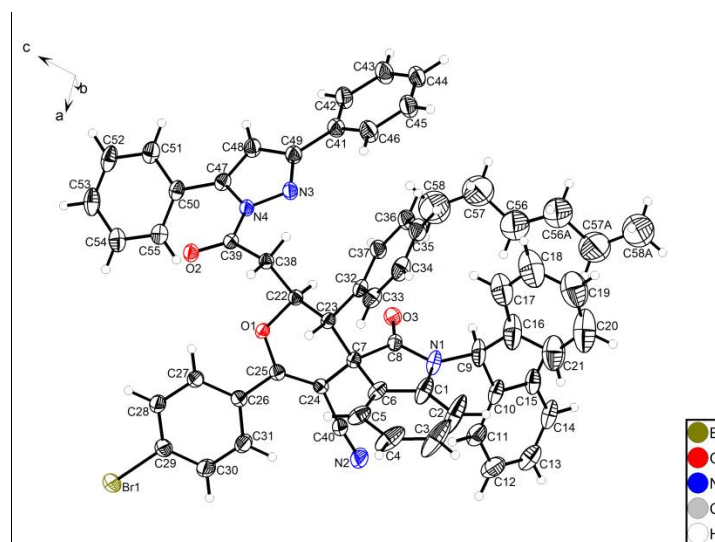

Figure S1 ORTEP of **4j** (at 50% level).

**Table 1 Crystal data and structure refinement for YZ0644-1.**

|                                        |                                                                 |
|----------------------------------------|-----------------------------------------------------------------|
| Identification code                    | YZ0644-1                                                        |
| Empirical formula                      | C <sub>58</sub> H <sub>46</sub> BrN <sub>4</sub> O <sub>3</sub> |
| Formula weight                         | 926.90                                                          |
| Temperature/K                          | 100.00(10)                                                      |
| Crystal system                         | triclinic                                                       |
| Space group                            | P-1                                                             |
| a/Å                                    | 11.2020(2)                                                      |
| b/Å                                    | 11.3554(2)                                                      |
| c/Å                                    | 18.8713(4)                                                      |
| $\alpha$ /°                            | 103.7952(18)                                                    |
| $\beta$ /°                             | 102.2696(18)                                                    |
| $\gamma$ /°                            | 93.4841(16)                                                     |
| Volume/Å <sup>3</sup>                  | 2262.21(8)                                                      |
| Z                                      | 2                                                               |
| $\rho_{\text{calc}}/\text{cm}^3$       | 1.361                                                           |
| $\mu/\text{mm}^{-1}$                   | 1.649                                                           |
| F(000)                                 | 962.0                                                           |
| Crystal size/mm <sup>3</sup>           | 0.05 × 0.04 × 0.03                                              |
| Radiation                              | CuK $\alpha$ ( $\lambda$ = 1.54184)                             |
| 2 $\theta$ range for data collection/° | 4.96 to 154.146                                                 |
| Index ranges                           | -14 ≤ h ≤ 14, -14 ≤ k ≤ 14, -22 ≤ l ≤ 23                        |
| Reflections collected                  | 30212                                                           |



Independent reflections      9179 [Rint = 0.0476, Rsigma = 0.0468]  
Data/restraints/parameters    9179/18/596  
Goodness-of-fit on  $F^2$         1.065  
Final R indexes [ $I \geq 2\sigma(I)$ ]     $R_1 = 0.0733$ ,  $wR_2 = 0.2054$   
Final R indexes [all data]       $R_1 = 0.0798$ ,  $wR_2 = 0.2130$   
Largest diff. peak/hole /  $e \text{ \AA}^{-3}$  1.96/-0.85

## VI. Characterization data.

### **3a-a:(2'S,3R,3'R)-1-benzyl-2'-(2-(3,5-dimethyl-1H-pyrazol-1-yl)-2-oxoethyl)-2-oxo-3',6'-diphenyl-2',3'-dihydrospiro[indoline-3,4'-pyran]-5'-carbonitrile**

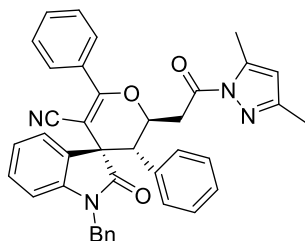

White solid, 50.7 mg, 84% yield (hexanes/Dichloromethane, v:v = 2:1), Mp 218-220 °C.  $[\alpha]_D^{25} = +29.5$  (c 0.302, DCM), 93% ee, >20:1 d.r..

$^1\text{H}$  NMR (500 MHz, chloroform-*d*)  $\delta$  7.84 – 7.71 (m, 2H), 7.48 – 7.46 (m, 1H), 7.45 – 7.43 (d,  $J = 7.0$  Hz, 1H), 7.42 – 7.32 (m, 3H), 7.20 – 7.17 (m, 2H), 7.6 (s, 2H), 7.14 – 7.11 (m, 3H), 7.01 – 6.86 (m, 2H), 6.71 (dd,  $J = 7.3, 1.8$  Hz, 2H), 6.37 (d,  $J = 7.5$  Hz, 1H), 6.29 (ddd,  $J = 11.6, 8.9, 3.1$  Hz, 1H), 5.94 (s, 1H), 4.81 (d,  $J = 14.1$  Hz, 1H), 4.62 (d,  $J = 14.1$  Hz, 1H), 3.57 (d,  $J = 11.1$  Hz, 1H), 3.44 (dd,  $J = 14.7, 8.9$  Hz, 1H), 3.37 (dd,  $J = 14.7, 3.1$  Hz, 1H), 2.56 (s, 3H), 2.18 (s, 3H).

$^{13}\text{C}$  NMR (125 MHz, chloroform-*d*)  $\delta$  175.0, 169.9, 167.1, 152.2, 144.1, 143.0, 134.8, 133.7, 132.6, 131.2, 129.4, 129.0, 128.6, 128.5, 128.3, 128.0, 127.2, 126.6, 123.4, 123.3, 117.5, 111.4, 109.8, 85.6, 73.5, 54.0, 50.1, 44.0, 38.9, 29.7, 14.5, 13.8.

HRMS (ESI+TOF):  $[\text{M}+\text{H}]^+$  Calcd for  $\text{C}_{39}\text{H}_{32}\text{N}_4\text{O}_3$  605.2547. Found 605.2556.

HPLC analysis: (IB column, Hexane: 2-propanol = 85:15, flow rate = 1.0 mL/min, wavelength = 254 nm):  $R_{t1} = 20.741$ ,  $R_{t2} = 23.349$ .

### **3a:(2'S,3R,3'R)-1-benzhydryl-2'-(2-(3,5-diphenyl-1H-pyrazol-1-yl)-2-oxoethyl)-2-oxo-3',6'-diphenyl-2',3'-dihydrospiro[indoline-3,4'-pyran]-5'-carbonitrile**

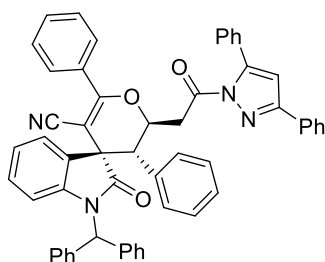

White solid, 78.8 mg, 98% yield (hexanes/Dichloromethane, v:v = 1:1), Mp 183-185 °C.  $[\alpha]_D^{25} = +36.5$  (c 0.564, DCM), 93% ee, >20:1 d.r..

$^1\text{H}$  NMR (400 MHz, chloroform-*d*)  $\delta$  7.86 (d,  $J = 1.7$  Hz, 1H), 7.84 (d,  $J = 1.3$  Hz, 1H), 7.81 (d,  $J = 1.5$  Hz, 1H), 7.79 (d,  $J = 1.5$  Hz, 1H), 7.47 – 7.45 (m, 2H), 7.44 (d,  $J = 2.8$  Hz, 1H), 7.43 (d,  $J = 1.6$  Hz, 1H), 7.42 (s, 1H), 7.41 – 7.40 (m, 4H), 7.40 – 7.39 (m, 2H), 7.38 – 7.36 (m, 1H), 7.26 (s, 2H), 7.25 – 7.22 (m, 3H), 7.21 – 7.19 (m, 4H), 7.12 (d,  $J = 7.8$  Hz, 2H), 7.09 – 7.04 (m, 3H), 6.94 (td,  $J = 7.9, 1.2$  Hz, 1H), 6.82 (s, 1H), 6.71 (s, 1H), 6.52 (d,  $J = 8.0$  Hz, 2H), 6.40-6.36 (m, 1H), 6.08 (d,  $J = 7.9$  Hz, 1H), 3.64 – 3.58 (m, 2H), 3.51 – 3.45 (m, 1H).

$^{13}\text{C}$  NMR (100 MHz, chloroform-*d*)  $\delta$  175.3, 169.2, 166.9, 153.8, 147.4, 142.8, 137.0, 136.8, 133.7, 132.5, 131.6, 131.2, 130.8, 129.4, 129.2, 129.1, 129.0, 128.9, 128.7, 128.6, 128.5, 128.4, 128.3, 128.2, 128.1, 128.0, 127.8, 127.3, 126.4, 123.4, 123.0, 117.5, 112.5, 110.1, 86.0, 73.8, 58.6, 53.4, 50.0, 39.6.

HRMS (ESI+TOF):  $[\text{M}+\text{H}]^+$  Calcd for  $\text{C}_{55}\text{H}_{40}\text{N}_4\text{O}_3$  805.3173. Found 805.3177.

HPLC analysis: (IA column, Hexane: 2-propanol = 96:4, flow rate = 0.6 mL/min, wavelength = 254 nm):  $R_{t1} = 29.457$ ,  $R_{t2} = 37.508$ .

**3b: (2'S,3R,3'R)-1-benzhydryl-3'-(3-bromophenyl)-2'-(2-(3,5-diphenyl-1H-pyrazol-1-yl)-2-oxoethyl)-2-oxo-6'-phenyl-2',3'-dihydrospiro[indoline-3,4'-pyran]-5'-carbonitrile**

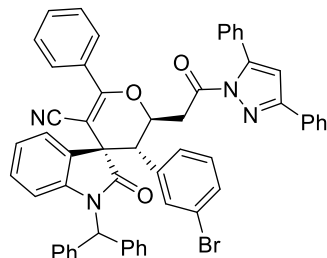

White solid, 81.0 mg, 92% yield (hexanes/Dichloromethane, v:v = 1:1), Mp 189-191 °C.  $[\alpha]_D^{25} = +47.5$  (c 0.764, DCM), 92% ee, >20:1 d.r..

$^1\text{H}$  NMR (400 MHz, chloroform-*d*)  $\delta$  7.87 (d,  $J = 0.8$  Hz, 2H), 7.81 (s, 1H), 7.79 (d,  $J = 1.7$  Hz, 1H), 7.64 – 7.46 (m, 2H), 7.45 – 7.42 (m, 4H), 7.41 (d,  $J = 3.6$  Hz, 4H), 7.40 – 7.38 (m, 2H), 7.37 – 7.31 (m, 1H), 7.28 – 7.25 (m, 3H), 7.23 (d,  $J = 3.2$  Hz, 2H), 7.20 (d,  $J = 8.4$  Hz, 2H), 7.16 (d,  $J = 7.2$  Hz, 2H), 7.12 – 7.07 (m, 1H), 7.01 – 6.75 (m, 4H), 6.72 (s, 1H), 6.64 (s, 1H), 6.62 (s, 1H), 6.32 (s, 1H), 6.15 (d,  $J = 8.0$  Hz, 1H), 3.78 – 3.55 (m, 2H), 3.50 – 3.34 (m, 1H).

$^{13}\text{C}$  NMR (100 MHz, chloroform-*d*)  $\delta$  174.9, 168.9, 166.8, 154.0, 147.4, 136.9, 136.8, 132.3, 131.5, 131.3, 130.7, 129.4, 129.2, 129.0, 128.9, 128.8, 128.7, 128.6, 128.5, 128.4, 128.3, 128.0, 127.9, 127.8, 127.5, 126.4, 123.3, 117.3, 112.7, 110.2, 85.9, 73.4, 58.6, 53.3, 49.6, 26.9.

HRMS (ESI+TOF):  $[\text{M}+\text{H}]^+$  Calcd for  $\text{C}_{55}\text{H}_{39}\text{BrN}_4\text{O}_3$  883.2278. Found 883.2274.

HPLC analysis: (IA column, Hexane: 2-propanol = 80:20, flow rate = 0.8 mL/min, wavelength = 254 nm):  $R_{t1} = 11.944$ ,  $R_{t2} = 22.649$ .

**3c:(2'S,3R,3'R)-1-benzhydryl-2'-(2-(3,5-diphenyl-1H-pyrazol-1-yl)-2-oxoethyl)-3'-(3-fluorophenyl)-2-oxo-6'-phenyl-2',3'-dihydrospiro[indoline-3,4'-pyran]-5'-carbonitrile**

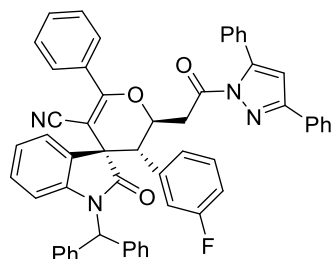

White solid, 71.9 mg, 87% yield (hexanes/Dichloromethane, v:v = 1:1), Mp 200-202 °C.  $[\alpha]_D^{25} = +61.6$  (c 0.631, DCM), 92% ee, >20:1 d.r..

$^1\text{H}$  NMR (400 MHz, chloroform-*d*)  $\delta$  7.79 (d,  $J = 1.8$  Hz, 1H), 7.77 (d,  $J = 1.5$  Hz, 1H), 7.74 (d,  $J = 1.2$  Hz, 1H), 7.72 (d,  $J = 1.6$  Hz, 1H), 7.38 (d,  $J = 1.7$  Hz, 1H), 7.36 (d,  $J = 1.6$  Hz, 2H), 7.36 – 7.35 (m, 2H), 7.34 (s, 3H), 7.32 (d,  $J = 2.0$  Hz, 2H), 7.18 – 7.17 (m, 5H), 7.16 (d,  $J = 2.4$  Hz, 2H), 7.14 – 7.12 (m, 2H), 7.10 (d,  $J = 1.5$  Hz, 1H), 7.08 (d,  $J = 1.2$  Hz, 1H), 7.07 – 7.05 (m, 1H), 7.02 (d,  $J = 7.6$  Hz, 1H), 6.89 (td,  $J = 7.8, 1.3$  Hz, 2H), 6.80 (d,  $J = 8.4$  Hz, 6.4 Hz, 1H), 6.77 (s, 1H), 6.65 (s, 1H), 6.59 (d,  $J = 7.6$  Hz, 2H), 6.28 – 6.22 (m, 1H), 6.08 (d,  $J = 8.0$  Hz, 1H), 3.54 (d,  $J = 10.7$  Hz, 2H), 3.36 (s, 1H).

$^{13}\text{C}$  NMR (100 MHz, chloroform-*d*)  $\delta$  175.1, 168.9, 166.8, 153.9, 147.4, 142.7, 136.9, 136.2, 132.4, 131.5, 131.2, 130.7, 129.3, 129.1, 129.0, 128.9, 128.8, 128.6, 128.5, 128.4, 128.3, 128.3, 128.1, 128.0, 127.8, 127.5, 126.4, 123.3, 123.1, 117.3, 112.6, 110.1, 85.9, 73.5, 58.7, 53.2, 49.7, 26.9.

HRMS (ESI+TOF):  $[\text{M}+\text{H}]^+$  Calcd for  $\text{C}_{55}\text{H}_{39}\text{FN}_4\text{O}_3$  823.3079. Found 823.3077.

HPLC analysis: (IA column, Hexane: 2-propanol = 80:20, flow rate = 0.8 mL/min, wavelength = 254 nm):  $R_{t1} = 13.204$ ,  $R_{t2} = 29.894$ .

**3d:(2'S,3R,3'R)-1-benzhydryl-3'-(3-chlorophenyl)-2'-(2-(3,5-diphenyl-1H-pyrazol-1-yl)-2-oxoethyl)-2-oxo-6'-phenyl-2',3'-dihydrospiro[indoline-3,4'-pyran]-5'-carbonitrile**

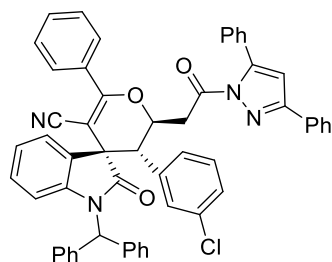

White solid, 84.2 mg, 99% yield (hexanes/Dichloromethane, v:v = 1:2), Mp 187-189 °C.  $[\alpha]_D^{25} = +66.5$  (c 0.793, DCM), 90% ee, >20:1 d.r..

$^1\text{H NMR}$  (400 MHz, chloroform-*d*)  $\delta$  7.77 (d,  $J = 1.9$  Hz, 1H), 7.76 (d,  $J = 1.5$  Hz, 1H), 7.74 (d,  $J = 1.1$  Hz, 1H), 7.72 (d,  $J = 1.6$  Hz, 1H), 7.36 – 7.39 (m, 4H), 7.35 (d,  $J = 1.7$  Hz, 2H), 7.34 (s, 4H), 7.30 – 7.32 (m, 3H), 7.20 – 7.21 (m, 1H), 7.18 (s, 4H), 7.15 (d,  $J = 2.8$  Hz, 3H), 7.13 – 7.14 (m, 1H), 7.10 (d,  $J = 2.0$  Hz, 1H), 7.09 (s, 1H), 7.01 – 7.05 (m, 1H), 6.89 (d,  $J = 0.8$  Hz, 1H), 6.75 (s, 1H), 6.64 (s, 1H), 6.57 (s, 1H), 6.55 (s, 1H), 6.24 (ddd,  $J = 11.6, 9.0, 2.9$  Hz, 1H), 6.06 (d,  $J = 7.9$  Hz, 1H), 3.49 – 3.54 (m, 2H), 3.38 (dd,  $J = 15.2, 9.0$  Hz, 1H).

$^{13}\text{C NMR}$  (100 MHz, chloroform-*d*)  $\delta$  175.04, 168.91, 166.86, 153.89, 147.43, 142.70, 136.85, 136.71, 134.18, 132.35, 132.10, 131.54, 130.67, 129.36, 129.10, 128.99, 128.88, 128.84, 128.65, 128.56, 128.47, 128.45, 128.39, 128.35, 127.82, 127.58, 126.35, 123.31, 123.04, 117.32, 112.64, 110.16, 85.81, 73.48, 58.75, 53.27, 49.39, 39.40.

HRMS (ESI+TOF):  $[\text{M}+\text{H}]^+$  Calcd for  $\text{C}_{55}\text{H}_{39}\text{ClN}_4\text{O}_3$  839.2783. Found 839.2788.

HPLC analysis: (IA column, Hexane: 2-propanol = 80:20, flow rate = 0.8 mL/min, wavelength = 254 nm):  $R_{t1} = 22.700$ ,  $R_{t2} = 28.976$ .

**3e: (2'S,3R,3'R)-1-benzhydryl-2'-(2-(3,5-diphenyl-1H-pyrazol-1-yl)-2-oxoethyl)-2-oxo-6'-phenyl-3'-(*m*-tolyl)-2',3'-dihydrospiro[indoline-3,4'-pyran]-5'-carbonitrile**

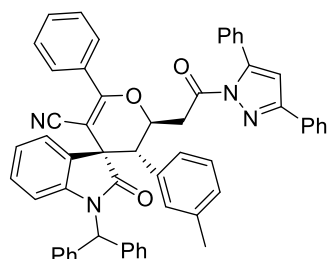

White solid, 75.6 mg, 92% yield (hexanes/Dichloromethane, v:v = 1:2), Mp 201-203 °C.  $[\alpha]_D^{25} = +19.7$  (c 0.378, DCM), 95% ee, >20:1 d.r..

$^1\text{H NMR}$  (400 MHz, chloroform-*d*)  $\delta$  7.79 (d,  $J = 1.9$  Hz, 1H), 7.77 (d,  $J = 1.5$  Hz, 1H), 7.74 (d,  $J = 1.4$  Hz, 1H), 7.72 (d,  $J = 1.7$  Hz, 1H), 7.37 (dd,  $J = 7.2, 1.6$  Hz, 2H), 7.34 (d,  $J = 3.2$  Hz, 2H), 7.33– 7.22 (m, 5H), 7.31 – 7.30 (m, 2H), 7.30 – 7.28 (m, 1H), 7.18 – 7.16 (m, 1H), 7.15 – 7.14 (m, 3H), 7.12 – 7.10 (m, 3H), 7.03 (d,  $J = 7.9$  Hz, 2H), 7.00 (d,  $J = 2.0$  Hz, 1H), 6.98 – 6.90 (m, 2H), 6.83 (t,  $J = 7.6$  Hz, 2H), 6.63 (s, 1H), 6.45 (s, 1H), 6.43 (s, 1H), 6.31 – 6.21 (m, 2H), 5.99 (d,  $J = 8.0$  Hz, 1H), 3.59 – 3.36 (m, 2H), 3.41 – 3.34 (m 1H), 1.34 (s, 3H).

$^{13}\text{C}$  NMR (100 MHz, chloroform-*d*)  $\delta$  175.3, 169.3, 166.9, 153.8, 147.4, 142.8, 136.8, 133.6, 132.6, 131.6, 131.2, 130.8, 129.3, 129.1, 129.0, 128.9, 128.8, 128.6, 128.5, 128.4, 128.3, 128.0, 127.8, 127.3, 126.4, 123.4, 122.9, 117.5, 112.5, 110.1, 86.0, 73.9, 53.4, 50.1, 39.7, 34.7, 27.0.

HRMS (ESI+TOF):  $[\text{M}+\text{H}]^+$  Calcd for  $\text{C}_{56}\text{H}_{42}\text{N}_4\text{O}_3$  819.3330. Found 819.3336.

HPLC analysis: (IA column, Hexane: 2-propanol = 80:20, flow rate = 0.8 mL/min, wavelength = 254 nm):  $R_{t1}$  = 11.546,  $R_{t2}$  = 23.421

**3f: (2'S,3R,3'R)-1-benzhydryl-2'-(2-(3,5-diphenyl-1H-pyrazol-1-yl)-2-oxoethyl)-3'-(4-methoxyphenyl)-2-oxo-6'-phenyl-2',3'-dihydrospiro[indoline-3,4'-pyran]-5'-carbonitrile**

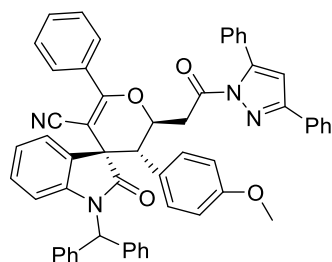

Colorless solid, 79.9 mg, 96% yield (hexanes/Dichloromethane, v:v = 1:2), Mp 211-213 °C.  $[\alpha]_D^{25}$  = +55.6 (*c* 0.681, DCM), 98% ee, >20:1 d.r..

$^1\text{H}$  NMR (400 MHz, chloroform-*d*)  $\delta$  7.86 (t,  $J$  = 1.9 Hz, 1H), 7.85 (t,  $J$  = 1.6 Hz, 1H), 7.82 (t,  $J$  = 1.4 Hz, 1H), 7.80 (t,  $J$  = 1.6 Hz, 1H), 7.46 – 7.34 (m, 4H), 7.43 – 7.42 (m, 3H), 7.41 (s, 2H), 7.41 – 7.36 (m, 4H), 7.27 – 7.24 (m, 2H), 7.22 (d,  $J$  = 2.4 Hz, 2H), 7.21 – 7.19 (m, 3H), 7.14 – 7.11 (m, 2H), 7.08 (dd,  $J$  = 7.6, 0.8 Hz, 1H), 6.94 (td,  $J$  = 7.8, 1.3 Hz, 1H), 6.84 (s, 1H), 6.71 (s, 1H), 6.57 (d,  $J$  = 1.6 Hz, 2H), 6.55 (d,  $J$  = 1.6 Hz, 2H), 6.30 (ddd,  $J$  = 11.1, 9.2, 2.9 Hz, 1H), 6.11 (d,  $J$  = 7.9 Hz, 1H), 3.71 (s, 3H), 3.62 (dd,  $J$  = 14.6, 2.9 Hz, 1H), 3.54 (d,  $J$  = 11.2 Hz, 1H), 3.52 – 3.46 (m, 1H).

$^{13}\text{C}$  NMR (100 MHz, chloroform-*d*)  $\delta$  175.3, 169.3, 166.8, 159.3, 153.7, 147.4, 142.8, 137.0, 136.7, 132.5, 131.6, 131.1, 130.7, 129.3, 129.2, 129.1, 129.0, 128.9, 128.8, 128.6, 128.5, 128.4, 128.3, 128.2, 128.1, 128.0, 127.8, 127.3, 126.3, 125.4, 123.3, 122.9, 117.5, 114.0, 112.5, 110.0, 85.9, 73.9, 58.4, 55.0, 53.5, 49.2, 39.6.

HRMS (ESI+TOF):  $[\text{M}+\text{H}]^+$  Calcd for  $\text{C}_{56}\text{H}_{42}\text{N}_4\text{O}_4$  835.3279. Found 835.3279.

HPLC analysis: (IC column, Hexane: 2-propanol = 85:15, flow rate = 1.0 mL/min, wavelength = 254 nm):  $R_{t1}$  = 13.918,  $R_{t2}$  = 15.763.

**3g: (2'S,3R,3'R)-1-benzhydryl-2'-(2-(3,5-diphenyl-1H-pyrazol-1-yl)-2-oxoethyl)-2-oxo-6'-phenyl-3'-(p-tolyl)-2',3'-dihydrospiro[indoline-3,4'-pyran]-5'-carbonitrile**

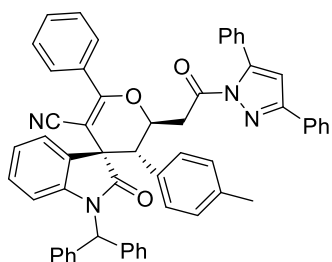

White solid, 59.8 mg, 73% yield (hexanes/Dichloromethane, v:v = 1:2), Mp 180-182 °C.  $[\alpha]_D^{25} = +42.0$  (c 0.544, DCM), 96% ee, >20:1 d.r..

$^1\text{H}$  NMR (400 MHz, chloroform-*d*)  $\delta$  7.79 (t,  $J = 2.0$  Hz, 1H), 7.77 (t,  $J = 1.6$  Hz, 1H), 7.74 (t,  $J = 1.6$  Hz, 1H), 7.72 (t,  $J = 2.4$  Hz, 1H), 7.38 (d,  $J = 0.8$  Hz, 1H), 7.36 (d,  $J = 2.0$  Hz, 2H), 7.35 – 7.34 (m, 2H), 7.34 – 7.33 (m, 3H), 7.33 – 7.31 (m, 2H), 7.31 – 7.30 (m, 1H), 7.20 – 7.17 (m, 4H), 7.15 (d,  $J = 2.1$  Hz, 2H), 7.13 (d,  $J = 2.2$  Hz, 2H), 7.11 – 7.09 (m, 1H), 7.04 (d,  $J = 7.5$  Hz, 2H), 7.01 (s, 1H), 6.86 (td,  $J = 7.8, 1.3$  Hz, 1H), 6.77 (d,  $J = 8.4$  Hz, 2H), 6.75 (s, 1H), 6.63 (s, 1H), 6.49 (d,  $J = 8.2$  Hz, 2H), 6.27 (td,  $J = 8.8, 4.2$  Hz, 1H), 6.01 (s, 1H), 3.52 (dd,  $J = 16.3, 2.9$  Hz, 1H), 3.47 (d,  $J = 11.1$  Hz, 1H), 3.40 (dd,  $J = 16.3, 9.3$  Hz, 1H), 2.19 (s, 3H).

$^{13}\text{C}$  NMR (100 MHz, chloroform-*d*)  $\delta$  175.3, 169.2, 166.8, 153.7, 147.4, 142.8, 137.6, 137.1, 136.8, 132.6, 131.6, 131.1, 130.8, 130.6, 129.3, 129.1, 129.0, 128.9, 128.8, 128.7, 128.6, 128.5, 128.4, 128.3, 128.2, 128.0, 127.8, 127.2, 126.4, 123.4, 122.9, 117.5, 112.5, 110.0, 86.0, 73.9, 58.9, 53.4, 49.6, 39.6, 21.2.

HRMS (ESI+TOF):  $[\text{M}+\text{H}]^+$  Calcd for  $\text{C}_{56}\text{H}_{42}\text{N}_4\text{O}_3$  819.3330. Found 819.3328.

HPLC analysis: (IA column, Hexane: 2-propanol = 80:20, flow rate = 0.8 mL/min, wavelength = 254 nm):  $R_{t1} = 19.092$ ,  $R_{t2} = 25.534$ .

**3h: (2'S,3R,3'R)-1-benzhydryl-2'-(2-(3,5-diphenyl-1H-pyrazol-1-yl)-2-oxoethyl)-2-oxo-6'-phenyl-3'-(o-tolyl)-2',3'-dihydrospiro[indoline-3,4'-pyran]-5'-carbonitrile**

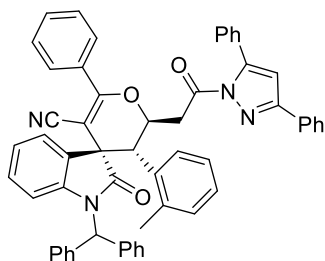

White solid, 57.5 mg, 70% yield (hexanes/Dichloromethane, v:v = 1:2), Mp 168-188 °C.  $[\alpha]_D^{25} = +37.9$  (c 0.544, DCM), 90% ee, >20:1 d.r..

$^1\text{H}$  NMR (400 MHz, chloroform-*d*)  $\delta$  7.84 (d,  $J$  = 1.8 Hz, 1H), 7.82 (d,  $J$  = 1.4 Hz, 2H), 7.80 (d,  $J$  = 1.6 Hz, 1H), 7.48 – 7.47 (m, 1H), 7.46 – 7.44 (m, 1H), 7.43 (d,  $J$  = 1.6 Hz, 2H), 7.42 (s, 1H), 7.41 – 7.40 (m, 2H), 7.39 – 7.38 (m, 3H), 7.38 – 7.37 (m, 1H), 7.26 – 7.24 (m, 2H), 7.23 (s, 2H), 7.22 (d,  $J$  = 3.2 Hz, 2H), 7.21 – 7.19 (m, 1H), 7.12 (d,  $J$  = 1.6 Hz, 2H), 7.11 – 7.04 (m, 2H), 7.02 (dd,  $J$  = 7.2, 0.8 Hz, 1H), 6.98 (d,  $J$  = 7.2 Hz, 1H), 6.92 (dd,  $J$  = 7.9, 1.3 Hz, 1H), 6.90 (s, 1H), 6.86 (t,  $J$  = 7.6 Hz, 1H), 6.69 (s, 1H), 6.65 (s, 1H), 6.63 (s, 1H), 6.25 (ddd,  $J$  = 10.8, 8.7, 3.3 Hz, 1H), 6.09 (d,  $J$  = 7.8 Hz, 1H), 4.06 (d,  $J$  = 10.8 Hz, 1H), 3.49 (dd,  $J$  = 15.2, 3.3 Hz, 1H), 3.37 (dd,  $J$  = 15.2, 8.7 Hz, 1H), 2.05 (s, 3H).

$^{13}\text{C}$  NMR (100 MHz, chloroform-*d*)  $\delta$  175.9, 169.1, 167.1, 153.7, 147.3, 142.8, 137.5, 137.0, 136.8, 132.6, 132.5, 131.6, 131.2, 131.0, 130.7, 129.3, 129.1, 129.0, 128.9, 128.8, 128.7, 128.6, 128.5, 128.4, 128.3, 128.2, 128.1, 128.0, 127.9, 127.8, 127.3, 127.0, 126.3, 124.3, 122.5, 117.4, 112.4, 110.0, 86.6, 74.9, 58.7, 53.8, 44.6, 39.1, 20.2.

HRMS (ESI+TOF):  $[\text{M}+\text{H}]^+$  Calcd for  $\text{C}_{56}\text{H}_{42}\text{N}_4\text{O}_3$  819.3330. Found 819.3324.

HPLC analysis: (IA column, Hexane: 2-propanol = 80:20, flow rate = 0.8 mL/min, wavelength = 254 nm):  $R_{t1}$  = 11.015,  $R_{t2}$  = 26.167.

**3i: (2'S,3R,3'R)-1-benzhydryl-2'-(2-(3,5-diphenyl-1H-pyrazol-1-yl)-2-oxoethyl)-3'-(2-fluorophenyl)-2-oxo-6'-phenyl-2',3'-dihydrospiro[indoline-3,4'-pyran]-5'-carbonitrile**

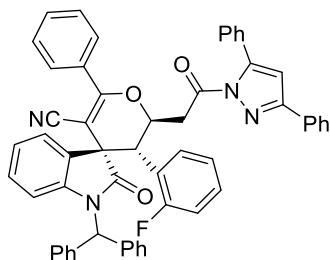

White solid, 65.8 mg, 80% yield (hexanes/Dichloromethane, v:v = 1:2), Mp 183-185 °C.  $[\alpha]_D^{25}$  = + 48.9 (c 0.629, DCM), 90% ee, >20:1 d.r..

$^1\text{H}$  NMR (400 MHz, chloroform-*d*)  $\delta$  7.78 (d,  $J$  = 1.9 Hz, 1H), 7.76 (d,  $J$  = 1.5 Hz, 1H), 7.75 (d,  $J$  = 1.2 Hz, 1H), 7.73 (d,  $J$  = 1.7 Hz, 1H), 7.42 (d,  $J$  = 7.7 Hz, 1H), 7.38 (t,  $J$  = 2.8 Hz, 1H), 7.37 – 7.35 (m, 2H), 7.34 (d,  $J$  = 1.6 Hz, 2H), 7.33 – 7.32 (m, 4H), 7.32 (s, 1H), 7.31 – 7.30 (m, 1H), 7.22 – 7.18 (m, 1H), 7.18 (s, 1H), 7.17 (s, 2H), 7.15 (d,  $J$  = 4.0 Hz, 1H), 7.14 (s, 1H), 7.12 – 7.11 (m, 1H), 7.08 – 7.04 (m, 3H), 7.00 (td,  $J$  = 7.6, 1.0 Hz, 1H), 6.86 (td,  $J$  = 7.9, 1.3 Hz, 1H), 6.80 (s, 1H), 6.75 (ddd,  $J$  = 9.7, 8.3, 1.2 Hz, 1H), 6.69 (td,  $J$  = 7.7, 1.2 Hz, 1H), 6.65 (s, 1H), 6.63 (d,  $J$  = 3.6 Hz, 2H), 6.31 (ddt,  $J$  = 11.9, 8.8, 2.2 Hz, 1H), 6.05 (d,  $J$  = 7.9 Hz, 1H), 4.08 (d,  $J$  = 11.1 Hz, 1H), 3.48 – 3.42 (m, 1H), 3.38 – 3.33 (m, 1H).

$^{13}\text{C}$  NMR (100 MHz, chloroform-*d*)  $\delta$  175.5, 168.2, 166.9, 153.8, 147.4, 142.4, 137.0, 136.9, 132.5, 131.6, 131.2, 130.7, 129.3, 129.1, 129.0, 128.9, 128.8, 128.7, 128.6, 128.5, 128.4, 128.3, 128.2, 128.0,



127.9, 127.8, 127.4, 126.4, 125.0, 124.3, 123.0, 121.3, 117.2, 115.7, 115.5, 112.1, 110.1, 86.3, 73.6, 58.8, 52.9, 40.6, 39.6.

HRMS (ESI+TOF):  $[M+H]^+$  Calcd for  $C_{55}H_{39}FN_4O_3$  823.3079. Found 823.3085.

HPLC analysis: (IA column, Hexane: 2-propanol = 80:20, flow rate = 0.8 mL/min, wavelength = 254 nm):  $R_{t1} = 13.411$ ,  $R_{t2} = 31.323$ .

**3j: (2'S,3R,3'R)-1-benzhydryl-3'-(3,5-dimethylphenyl)-2'-(2-(3,5-diphenyl-1H-pyrazol-1-yl)-2-oxoethyl)-2-oxo-6'-phenyl-2',3'-dihydrospiro[indoline-3,4'-pyran]-5'-carbonitrile**

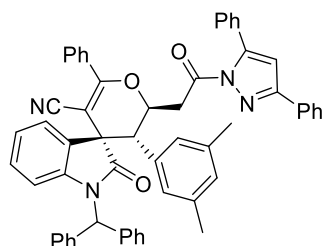

White solid, 45.8 mg, 55% yield (hexanes/Dichloromethane, v:v = 1:2), Mp 215-217 °C.  $[\alpha]_D^{25} = +81.5$  (c 0.694, DCM), 91% ee, >20:1 d.r..

$^1H$  NMR (400 MHz, chloroform-*d*)  $\delta$  7.84 (d,  $J = 1.8$  Hz, 1H), 7.82 – 7.83 (m, 2H), 7.80 (d,  $J = 1.6$  Hz, 1H), 7.44 – 7.48 (m, 3H), 7.43 (dd,  $J = 3.2$  Hz, 1.2 Hz, 2H), 7.40 – 7.42 (m, 2H), 7.39 (s, 4H), 7.37 – 7.38 (m, 1H), 7.30 (d,  $J = 8.1$  Hz, 1H), 7.26 (s, 1H), 7.24 – 7.25 (m, 1H), 7.23 (s, 1H), 7.22 (d,  $J = 1.6$  Hz, 1H), 7.21 (s, 1H), 7.19 – 7.20 (m, 1H), 7.12 (t,  $J = 7.6$  Hz, 2H), 7.03 (td,  $J = 7.5$ , 1.0 Hz, 1H), 6.92 (dd,  $J = 7.9$ , 1.4 Hz, 1H), 6.70 (s, 1H), 6.79 (s, 1H), 6.69 (s, 1H), 6.66 (s, 1H), 6.63 (d,  $J = 6.4$  Hz, 2H), 6.21 (ddd,  $J = 10.8$ , 8.6, 3.3 Hz, 1H), 6.08 (d,  $J = 7.9$  Hz, 1H), 4.00 (d,  $J = 10.8$  Hz, 1H), 3.49 (dd,  $J = 16.0$ , 3.3 Hz, 1H), 3.38 (dd,  $J = 16.0$ , 8.7 Hz, 1H), 2.20 (s, 3H), 1.99 (s, 3H).

$^{13}C$  NMR (100 MHz, chloroform-*d*)  $\delta$  175.9, 169.2, 167.1, 153.6, 147.3, 142.8, 137.2, 137.1, 136.8, 132.5, 131.7, 131.6, 131.1, 130.8, 129.4, 129.3, 129.1, 129.0, 128.9, 128.8, 128.7, 128.5, 128.4, 128.3, 128.2, 128.1, 127.9, 127.8, 127.6, 127.3, 127.2, 126.3, 124.3, 122.4, 117.5, 112.4, 110.0, 86.5, 74.9, 58.8, 53.8, 44.3, 39.0, 21.0, 20.1.

HRMS (ESI+TOF):  $[M+H]^+$  Calcd for  $C_{57}H_{44}N_4O_3$  833.3486. Found 833.3489.

HPLC analysis: (IA column, Hexane: 2-propanol = 80:20, flow rate = 0.8 mL/min, wavelength = 254 nm):  $R_{t1} = 13.204$ ,  $R_{t2} = 26.562$ .

**3k: (2'S,3R,3'R)-1-benzhydryl-2'-(2-(3,5-diphenyl-1H-pyrazol-1-yl)-2-oxoethyl)-2-oxo-6'-phenyl-3'-(thiophen-2-yl)-2',3'-dihydrospiro[indoline-3,4'-pyran]-5'-carbonitrile**

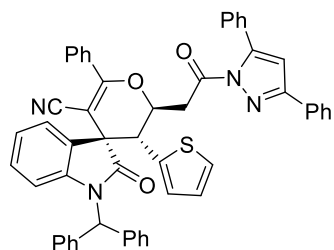

White solid, 77.4 mg, 96% yield (hexanes/Dichloromethane, v:v = 1:2), Mp 226-228 °C.  $[\alpha]_D^{25} = +84.6$  (c 0.731, DCM), 96% ee, >20:1 d.r..

$^1\text{H NMR}$  (400 MHz, chloroform-*d*)  $\delta$  7.87 (t,  $J = 2.0$  Hz, 1H), 7.86 (t,  $J = 1.6$  Hz, 1H), 7.79 (d,  $J = 1.2$  Hz, 1H), 7.77 (d,  $J = 1.6$  Hz, 1H), 7.44 - 7.46 (m, 2H), 7.42 - 7.43 (m, 3H), 7.41 (d,  $J = 0.8$  Hz, 4H), 7.39 - 7.40 (m, 2H), 7.37 - 7.38 (d,  $J = 2.8$  Hz, 1H), 7.31 - 7.35 (m, 1H), 7.25 (d,  $J = 0.8$  Hz, 2H), 7.24 (s, 2H), 7.22 - 7.23 (d,  $J = 3.2$  Hz, 1H), 7.19 - 7.20 (m, 1H), 7.17 - 7.18 (m, 1H), 7.11 (t,  $J = 7.6$  Hz, 1H), 7.03 (dd,  $J = 4.8, 0.4$  Hz, 1H), 6.98 (td,  $J = 7.8, 1.3$  Hz, 1H), 6.87 (s, 1H), 6.84 (dd,  $J = 3.6, 1.0$  Hz, 1H), 6.75 (t,  $J = 2.6$  Hz, 2H), 6.73 (t,  $J = 1.7$  Hz, 1H), 6.71 (s, 1H), 6.28 (ddd,  $J = 11.4, 8.7, 3.0$  Hz, 1H), 6.18 (d,  $J = 7.9$  Hz, 1H), 3.92 (d,  $J = 10.9$  Hz, 1H), 3.71 - 3.75 (m, 1H), 3.56 (dd,  $J = 16.5, 8.7$  Hz, 1H).

$^{13}\text{C NMR}$  (100 MHz, chloroform-*d*)  $\delta$  175.4, 169.4, 166.8, 153.8, 147.4, 143.0, 137.0, 136.9, 134.9, 132.4, 131.6, 131.2, 130.7, 129.3, 129.2, 129.1, 129.0, 128.9, 128.8, 128.7, 128.6, 128.5, 128.4, 128.32, 128.2, 128.0, 127.8, 127.6, 127.5, 127.4, 127.1, 126.6, 126.4, 125.2, 123.3, 123.1, 117.3, 112.5, 110.08, 85.6, 73.9, 58.7, 53.2, 45.2, 39.3.

HRMS (ESI+TOF):  $[\text{M}+\text{H}]^+$  Calcd for  $\text{C}_{53}\text{H}_{38}\text{N}_4\text{O}_3\text{S}$  811.2737. Found 811.2729.

HPLC analysis: (IA column, Hexane: 2-propanol = 80:20, flow rate = 0.8 mL/min, wavelength = 254 nm):  $R_{t1} = 20.116$ ,  $R_{t2} = 42.101$ .

**3l: (2'S,3R,3'R)-1-benzhydryl-2'-(2-(3,5-diphenyl-1H-pyrazol-1-yl)-2-oxoethyl)-3'-(furan-2-yl)-2-oxo-6'-phenyl-2',3'-dihydrospiro[indoline-3,4'-pyran]-5'-carbonitrile**

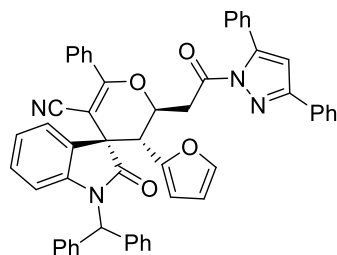

White solid, 70.7 mg, 89% yield (hexanes/Dichloromethane, v:v = 1:2), Mp 219-221 °C.  $[\alpha]_D^{25} = +81.5$  (c 0.694, DCM), 85% ee, >20:1 d.r..

$^1\text{H}$  NMR (400 MHz, chloroform-*d*)  $\delta$  7.78 (d,  $J = 1.9$  Hz, 1H), 7.76 (d,  $J = 1.6$  Hz, 1H), 7.71 (d,  $J = 2.0$  Hz, 1H), 7.69 (d,  $J = 1.7$  Hz, 1H), 7.34 – 7.36 (m, 2H), 7.32 (s, 3H), 7.31 – 7.32 (m, 3H), 7.30 (s, 2H), 7.28 (d,  $J = 1.2$  Hz, 2H), 7.17 (s, 2H), 7.17 (s, 4H), 7.14 – 7.16 (m, 2H), 6.98 (t,  $J = 7.5$  Hz, 1H), 6.93 (s, 1H), 6.92 (d,  $J = 0.8$  Hz, 2H), 6.89 (s, 1H), 6.86 (s, 1H), 6.62 (s, 1H), 6.18 – 6.13 (m, 2H), 5.97 (dd,  $J = 3.3, 1.8$  Hz, 1H), 5.82 (d,  $J = 3.2$  Hz, 1H), 3.78 (d,  $J = 10.9$  Hz, 1H), 3.48 (s, 1H), 3.47 (s, 1H).

$^{13}\text{C}$  NMR (100 MHz, chloroform-*d*)  $\delta$  175.4, 168.8, 167.0, 153.7, 147.7, 147.4, 142.8, 137.1, 137.0, 132.4, 131.6, 131.2, 130.7, 129.3, 129.2, 129.1, 129.0, 128.9, 128.8, 128.6, 128.5, 128.4, 128.3, 128.0, 127.8, 127.6, 126.3, 123.3, 123.1, 117.3, 112.4, 110.4, 110.1, 110.0, 85.6, 72.7, 58.9, 51.8, 44.1, 38.8.

HRMS (ESI+TOF):  $[\text{M}+\text{H}]^+$  Calcd for  $\text{C}_{53}\text{H}_{38}\text{N}_4\text{O}_4$  795.2966. Found 795.2958.

HPLC analysis: (IA column, Hexane: 2-propanol = 80:20, flow rate = 0.8 mL/min, wavelength = 254 nm):  $R_{t1} = 19.662$ ,  $R_{t2} = 62.790$ .

**4a: (2'S,3R,3'R)-2'-(2-(3,5-diphenyl-1H-pyrazol-1-yl)-2-oxoethyl)-2-oxo-1,3',6'-triphenyl-2',3'-dihydrospiro[indoline-3,4'-pyran]-5'-carbonitrile**

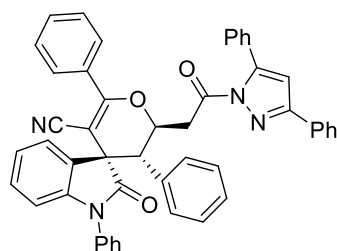

White solid, 70.9 mg, 99% yield (hexanes/Dichloromethane, v:v = 1:4), Mp 200-202 °C.  $[\alpha]_D^{25} = +31.5$  (c 0.379, DCM), 69% ee, >20:1 d.r..

$^1\text{H}$  NMR (400 MHz, Chloroform-*d*)  $\delta$  7.85 (d,  $J = 2.0$  Hz, 2H), 7.83 (d,  $J = 1.6$  Hz, 2H), 7.52 (dd,  $J = 7.1, 1.5$  Hz, 1H), 7.49 – 7.46 (m, 1H), 7.46 – 7.43 (m, 2H), 7.42 – 7.41 (m, 6H), 7.40 – 7.39 (m, 3H), 7.39 – 7.28 (m, 3H), 7.25 (s, 1H), 7.23 – 7.22 (m, 1H), 7.21 (d,  $J = 0.8$  Hz, 1H), 7.19 (dd,  $J = 2.8, 1.6$  Hz, 1H), 7.16 (dd,  $J = 7.6, 1.5$  Hz, 1H), 7.01 – 6.98 (m, 1H), 6.89 (d,  $J = 7.2$  Hz, 2H), 6.71 (s, 1H), 6.44 (dd,  $J = 7.5, 1.3$  Hz, 1H), 6.31 (ddd,  $J = 11.6, 9.1, 2.9$  Hz, 1H), 3.65 (dd,  $J = 16.4, 2.9$  Hz, 1H), 3.59 (d,  $J = 11.1$  Hz, 1H), 3.51 (dd,  $J = 16.4, 9.1$  Hz, 1H).

$^{13}\text{C}$  NMR (100 MHz,  $\text{CDCl}_3$ )  $\delta$  174.3, 169.1, 167.5, 153.8, 147.4, 143.9, 133.8, 133.5, 132.5, 131.6, 131.2, 130.7, 129.5, 129.41, 129.3, 129.0, 128.9, 128.8, 128.7, 128.5, 128.4, 128.3, 128.2, 128.0, 126.7, 126.4, 123.7, 123.6, 117.5, 114.1, 110.1, 109.7, 85.0, 73.4, 54.2, 50.9, 39.4, 29.7.

HRMS (ESI+TOF):  $[M+H]^+$  Calcd for  $C_{48}H_{34}N_4O_3$  715.2704. Found 715.2708.

HPLC analysis: (IA column, Hexane: 2-propanol = 75:25, flow rate = 0.8 mL/min, wavelength = 254 nm):  $R_{t1}$  = 30.940,  $R_{t2}$  = 34.639.

**4b: (2'S,3R,3'R)-2'-(2-(3,5-diphenyl-1H-pyrazol-1-yl)-2-oxoethyl)-1-methyl-2-oxo-3',6'-diphenyl-2',3'-dihydrospiro[indoline-3,4'-pyran]-5'-carbonitrile**

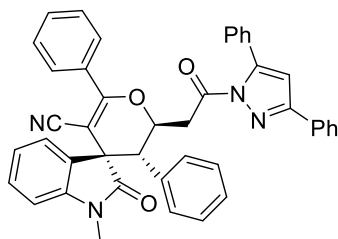

White solid, 54.4 mg, 84% yield (hexanes/Dichloromethane, v:v = 1:4), Mp 216-218 °C.  $[\alpha]_D^{25}$  = + 80.0 (c 0.528, DCM), 75% ee, >20:1 d.r..

$^1H$  NMR (400 MHz, chloroform-*d*)  $\delta$  7.79 (d,  $J$  = 1.7 Hz, 1H), 7.77 (d,  $J$  = 1.3 Hz, 1H), 7.75 (d,  $J$  = 1.1 Hz, 1H), 7.73 (d,  $J$  = 1.7 Hz, 1H), 7.40 – 7.38 (m, 3H), 7.36 (d,  $J$  = 1.6 Hz, 2H), 7.35 – 7.34 (m, 5H), 7.33 – 7.31 (m, 3H), 7.18 (s, 3H), 7.15 (dd,  $J$  = 7.7, 1.3 Hz, 1H), 7.10 (d,  $J$  = 7.2 Hz, 1H), 7.05 (d,  $J$  = 7.6 Hz, 1H), 6.64 (s, 1H), 6.45 (d,  $J$  = 7.7 Hz, 1H), 6.23 (ddd,  $J$  = 11.6, 9.3, 2.9 Hz, 1H), 3.54 – 3.49 (m, 1H), 3.42 – 3.35 (m, 2H), 2.80 (s, 3H).

$^{13}C$  NMR (100 MHz, chloroform-*d*)  $\delta$  174.8, 169.1, 167.4, 153.8, 147.4, 143.6, 133.4, 132.6, 131.6, 131.2, 130.7, 129.5, 129.3, 129.1, 129.0, 128.9, 128.8, 128.5, 128.3, 128.1, 128.0, 126.4, 123.4, 123.2, 117.5, 110.1, 108.4, 84.7, 73.4, 54.0, 50.8, 39.6, 26.2.

HRMS (ESI+TOF):  $[M+H]^+$  Calcd for  $C_{43}H_{32}N_4O_3$  653.2574. Found 653.2569.

HPLC analysis: (IA column, Hexane: 2-propanol = 75:25, flow rate = 0.8 mL/min, wavelength = 254 nm):  $R_{t1}$  = 12.944,  $R_{t2}$  = 16.351.

**4c: (2'S,3R,3'R)-1-benzyl-2'-(2-(3,5-diphenyl-1H-pyrazol-1-yl)-2-oxoethyl)-2-oxo-3',6'-diphenyl-2',3'-dihydrospiro[indoline-3,4'-pyran]-5'-carbonitrile**

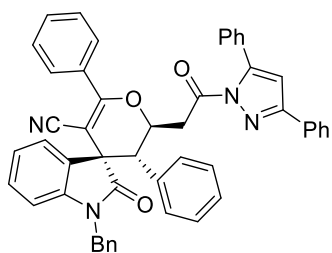

White solid, 72.8 mg, 99% yield (hexanes/Dichloromethane, v:v = 1:2), Mp 230-232 °C.  $[\alpha]_D^{25} = +63.8$  (c 0.694, DCM), 84% ee, >20:1 d.r..

$^1\text{H}$  NMR (400 MHz, chloroform-*d*)  $\delta$  7.79 (d,  $J = 1.9$  Hz, 1H), 7.78 (d,  $J = 1.4$  Hz, 1H), 7.75 (d,  $J = 1.2$  Hz, 1H), 7.73 (d,  $J = 1.6$  Hz, 1H), 7.48 – 7.41 (m, 1H), 7.40 – 7.39 (m, 1H), 7.38 (d,  $J = 2.8$  Hz, 1H), 7.37 (s, 1H), 7.36 – 7.35 (m, 1H), 7.35 – 7.34 (m, 5H), 7.33 (d,  $J = 2.0$  Hz, 1H), 7.32 (s, 1H), 7.31 – 7.28 (m, 1H), 7.17 (s, 2H), 7.05 – 7.01 (m, 2H), 7.08 (d,  $J = 2.1$  Hz, 2H), 7.06 (d,  $J = 2.8$  Hz, 1H), 7.05 – 7.03 (m, 1H), 6.67 – 6.65 (m, 1H), 6.42 (s, 1H), 6.63 – 6.62 (m, 1H), 6.33 – 6.27 (m, 2H), 4.75 – 4.71 (m, 1H), 4.55 – 4.51 (m, 1H), 3.58 – 3.53 (m, 1H), 3.51 (d,  $J = 11.2$  Hz, 1H), 3.41 (dd,  $J = 15.2, 9.3$  Hz, 1H).

$^{13}\text{C}$  NMR (100 MHz, chloroform-*d*)  $\delta$  174.9, 169.2, 167.1, 153.8, 147.4, 143.0, 134.7, 133.7, 132.5, 131.6, 131.2, 130.8, 129.5, 129.3, 129.0, 128.9, 128.8, 128.6, 128.5, 128.4, 128.1, 128.0, 127.3, 126.7, 126.4, 123.5, 123.3, 117.4, 110.1, 109.9, 85.7, 73.8, 53.9, 50.0, 44.0, 39.7.

HRMS (ESI+TOF):  $[\text{M}+\text{H}]^+$  Calcd for  $\text{C}_{49}\text{H}_{36}\text{N}_4\text{O}_3$  729.2860. Found 729.2864.

HPLC analysis: (IA column, Hexane: 2-propanol = 80:20, flow rate = 0.8 mL/min, wavelength = 254 nm):  $R_{t1} = 29.564$ ,  $R_{t2} = 34.927$ .

**4d: (2'S,3R,3'R)-1-benzhydryl-2'-(2-(3,5-diphenyl-1H-pyrazol-1-yl)-2-oxoethyl)-5-methyl-2-oxo-3',6'-diphenyl-2',3'-dihydrospiro[indoline-3,4'-pyran]-5'-carbonitrile**

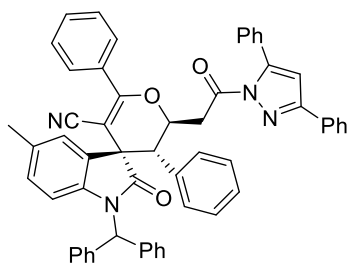

White solid, 74.4 mg, 91% yield (hexanes/Dichloromethane, v:v = 1:1), Mp 150-152 °C.  $[\alpha]_D^{25} = +50.8$  (c 0.680, DCM), 94% ee, >20:1 d.r..

$^1\text{H}$  NMR (400 MHz, chloroform-*d*)  $\delta$  7.85 (s, 1H), 7.84 (s, 1H), 7.82 (s, 1H), 7.80 (d,  $J = 1.7$  Hz, 1H), 7.46 – 7.43 (m, 3H), 7.42 (s, 1H), 7.40 (d,  $J = 2.3$  Hz, 5H), 7.38 (s, 2H), 7.36 – 7.34 (m, 1H), 7.27 –

7.23 (m, 3H), 7.22 (s, 1H), 7.21 – 7.18 (m, 5H), 7.09 (t,  $J = 5.2$  Hz, 2H), 7.06 (t,  $J = 7.6$  Hz, 2H), 6.80 (s, 1H), 6.71 (d,  $J = 7.6$  Hz, 1H), 6.70 (s, 1H), 6.50 (d,  $J = 7.6$  Hz, 2H), 6.36 (ddd,  $J = 11.6, 9.2, 2.9$  Hz, 1H), 5.96 (d,  $J = 8.1$  Hz, 1H), 3.64 – 3.57 (m, 2H), 3.50 – 3.44 (m, 1H), 2.33 (s, 3H).

$^{13}\text{C}$  NMR (100 MHz, chloroform- $d$ )  $\delta$  175.8, 169.2, 166.5, 153.7, 147.3, 138.2, 138.0, 134.7, 133.9, 132.8, 132.6, 131.7, 131.0, 130.7, 130.2, 130.1, 129.0, 129.9, 128.8, 128.5, 128.3, 128.2, 128.0, 127.4, 127.1, 126.4, 122.2, 117.9, 110.0, 86.6, 73.9, 52.9, 50.0, 39.7, 30.2, 20.9.

HRMS (ESI+TOF):  $[\text{M}+\text{H}]^+$  Calcd for  $\text{C}_{56}\text{H}_{42}\text{N}_4\text{O}_3$  819.3330. Found 819.3329.

HPLC analysis: (IA column, Hexane: 2-propanol = 80:20, flow rate = 0.8 mL/min, wavelength = 254 nm):  $R_{t1} = 14.208$ ,  $R_{t2} = 23.789$ .

**4e: (2'S,3R,3'R)-1-benzhydryl-5-bromo-2'-(2-(3,5-diphenyl-1H-pyrazol-1-yl)-2-oxoethyl)-2-oxo-3',6'-diphenyl-2',3'-dihydrospiro[indoline-3,4'-pyran]-5'-carbonitrile**

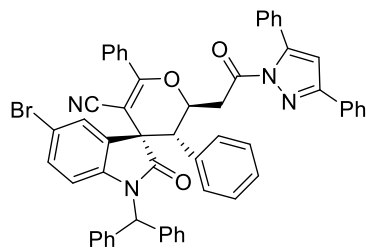

White solid, 76.4 mg, 86% yield (hexanes/Dichloromethane, v:v = 1:1), Mp 213-215 °C.  $[\alpha]_{\text{D}}^{25} = +31.0$  (c 0.686, DCM), 86% ee, >20:1 d.r..

$^1\text{H}$  NMR (400 MHz, chloroform- $d$ )  $\delta$  7.86 (d,  $J = 1.8$  Hz, 1H), 7.84 (s, 1H), 7.82 (s, 1H), 7.79 (d,  $J = 1.7$  Hz, 1H), 7.59 (d,  $J = 2.0$  Hz, 1H), 7.47 (d,  $J = 7.2$  Hz, 1H), 7.45 (s, 1H), 7.44 (s, 1H), 7.42 (s, 6H), 7.40 (d,  $J = 1.2$  Hz, 2H), 7.38 (s, 1H), 7.25 – 7.28 (d,  $J = 6.8$  Hz, 2H), 7.24 (s, 2H), 7.21 (d,  $J = 7.2$  Hz, 2H), 7.18 (d,  $J = 2.2$  Hz, 1H), 7.16 (s, 1H), 7.13 (s, 1H), 7.11 (s, 1H), 7.11 (s, 1H), 7.08 – 7.09 (m, 1H), 7.05 (dd,  $J = 8.6, 2.0$  Hz, 1H), 6.80 (s, 1H), 6.71 (s, 1H), 6.47 (s, 1H), 6.45 (s, 1H), 6.32 (ddd,  $J = 11.5, 8.7, 3.2$  Hz, 1H), 5.95 (d,  $J = 8.5$  Hz, 1H), 3.57 – 3.61 (m, 2H), 3.51 (dd,  $J = 6.8$  Hz, 15.0 Hz, 8.8 Hz, 1H).

$^{13}\text{C}$  NMR (100 MHz, chloroform- $d$ )  $\delta$  174.8, 169.0, 167.2, 153.8, 147.4, 141.8, 136.6, 136.3, 133.3, 132.3, 131.9, 131.5, 131.3, 131.2, 130.7, 129.3, 129.0, 128.9, 128.8, 128.6, 128.5, 128.4, 128.3, 128.0, 127.9, 127.5, 126.5, 126.3, 117.3, 115.8, 113.9, 110.1, 85.3, 73.7, 58.6, 53.5, 49.9, 39.3.

HRMS (ESI+TOF):  $[\text{M}+\text{H}]^+$  Calcd for  $\text{C}_{55}\text{H}_{39}\text{BrN}_4\text{O}_3$  883.2278. Found 883.2270.

HPLC analysis: (IA column, Hexane: 2-propanol = 80:20, flow rate = 0.8 mL/min, wavelength = 254 nm):  $R_{t1} = 15.225$ ,  $R_{t2} = 19.427$ .

**4f: (2'S,3R,3'R)-1-benzhydryl-7-chloro-2'-(2-(3,5-diphenyl-1H-pyrazol-1-yl)-2-oxoethyl)-2-oxo-3',6'-diphenyl-2',3'-dihydrospiro[indoline-3,4'-pyran]-5'-carbonitrile**

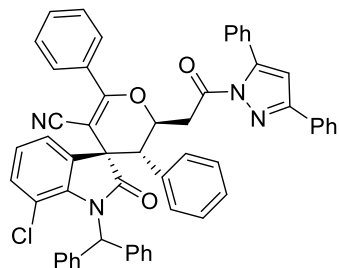

Colorless solid, 71.1 mg, 85% yield (hexanes/Dichloromethane, v:v = 1:1), Mp 176-178 °C.  $[\alpha]_D^{25} = +46.8$  (c 0.687, DCM), 94% ee, >20:1 d.r..

$^1\text{H}$  NMR (400 MHz, chloroform-*d*)  $\delta$  7.75 (d,  $J = 2.4$  Hz, 1H), 7.73 (d,  $J = 1.7$  Hz, 1H), 7.69 (s, 1H), 7.67 (d,  $J = 1.7$  Hz, 1H), 7.38 – 7.37 (m, 1H), 7.36 – 7.35 (m, 2H), 7.33 – 7.31 (m, 4H), 7.30 (s, 1H), 7.29 – 7.28 (m, 4H), 7.26 – 7.23 (m, 1H), 7.20 – 7.18 (m, 4H), 7.16 – 7.13 (m, 5H), 7.10 (d,  $J = 8.4$  Hz, 2H), 7.07 (s, 1H), 7.05 (d,  $J = 8.0$  Hz, 2H), 7.03 – 6.95 (m, 3H), 6.61 (s, 1H), 6.17 (t,  $J = 10.3$  Hz, 1H), 3.51 (dd,  $J = 15.2, 2.8$  Hz, 1H), 3.43 (d,  $J = 11.0$  Hz, 1H), 3.29 – 3.29 (m, 1H).

$^{13}\text{C}$  NMR (100 MHz, chloroform-*d*)  $\delta$  175.3, 169.0, 167.1, 153.8, 147.4, 139.9, 137.9, 133.1, 132.8, 132.4, 131.6, 131.3, 130.6, 129.3, 128.9, 128.8, 128.5, 128.3, 128.2, 128.1, 128.0, 128.0, 127.4, 126.4, 124.1, 122.5, 117.6, 110.1, 85.5, 73.8, 53.0, 49.9, 39.6, 31.5.

HRMS (ESI+TOF):  $[\text{M}+\text{H}]^+$  Calcd for  $\text{C}_{55}\text{H}_{39}\text{ClN}_4\text{O}_3$  839.2783. Found 839.2789.

HPLC analysis: (IA column, Hexane: 2-propanol = 80:20, flow rate = 0.8 mL/min, wavelength = 254 nm):  $R_{t1} = 10.884$ ,  $R_{t2} = 16.461$ .

**4g: (2'S,3R,3'R)-1-benzhydryl-2'-(2-(3,5-diphenyl-1H-pyrazol-1-yl)-2-oxoethyl)-5,7-dimethyl-2-oxo-3',6'-diphenyl-2',3'-dihydrospiro[indoline-3,4'-pyran]-5'-carbonitrile**

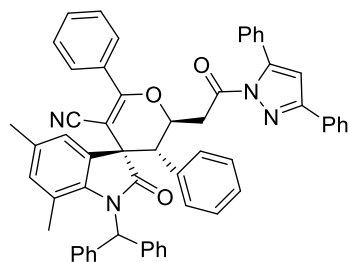

White solid, 42.1 mg, 51% yield (hexanes/Dichloromethane, v:v = 1:1), Mp 195-197 °C.  $[\alpha]_D^{25} = +11.7$  (c 0.381, DCM), 95% ee, >20:1 d.r..

$^1\text{H}$  NMR (400 MHz, Chloroform-*d*)  $\delta$  7.84 (d,  $J = 2.1$  Hz, 1H), 7.82 (d,  $J = 1.6$  Hz, 1H), 7.79 (d,  $J = 1.2$  Hz, 1H), 7.77 (d,  $J = 1.7$  Hz, 1H), 7.46 – 7.44 (m, 1H), 7.42 (d,  $J = 1.6$  Hz, 1H), 7.41 (d,  $J = 1.6$  Hz, 1H), 7.41 – 7.40 (m, 3H), 7.39 – 7.37 (m, 5H), 7.36 (s, 1H), 7.26 – 7.25 (m, 2H), 7.24 (d,  $J = 2.0$  Hz, 2H), 7.23 – 7.19 (m, 2H), 7.18 (s, 1H), 7.17 – 7.16 (m, 2H), 7.23 – 6.99 (m, 5H), 6.91 – 6.79 (m, 2H), 6.73 (s, 1H), 6.69 (s, 1H), 6.30 (t,  $J = 6.4$  Hz, 1H), 3.61 (dd,  $J = 16.0, 2.8$  Hz, 1H), 3.55 (d,  $J = 11.1$  Hz, 1H), 3.38 (dd,  $J = 16.0, 9.3$  Hz, 1H), 2.37 (s, 3H), 1.57 (s, 3H).

$^{13}\text{C}$  NMR (100 MHz, Chloroform-*d*)  $\delta$  169.2, 166.5, 153.7, 147.3, 138.2, 138.0, 134.7, 133.9, 132.8, 132.6, 131.6, 131.0, 130.7, 130.2, 129.2, 129.0, 128.9, 128.8, 128.4, 128.3, 128.2, 128.0, 127.3, 127.1, 126.4, 122.2, 117.9, 110.0, 86.6, 73.9, 52.9, 50.0, 39.7, 29.7, 26.9, 20.9.

HRMS (ESI+TOF):  $[\text{M}+\text{H}]^+$  Calcd for  $\text{C}_{57}\text{H}_{44}\text{N}_4\text{O}_3$  833.3486. Found 833.3490.

HPLC analysis: (IB column, Hexane: 2-propanol = 85:15, flow rate = 0.8 mL/min, wavelength = 254 nm):  $R_{t1} = 12.588$ ,  $R_{t2} = 14.470$ .

**4h: (2'S,3R,3'R)-1-benzhydryl-2'-(2-(3,5-diphenyl-1H-pyrazol-1-yl)-2-oxoethyl)-6'-(4-fluorophenyl)-2-oxo-3'-phenyl-2',3'-dihydrospiro[indoline-3,4'-pyran]-5'-carbonitrile**

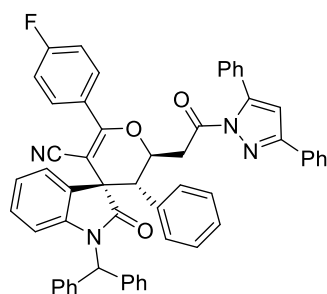

White solid, 67.4 mg, 82% yield (hexanes/Dichloromethane, v:v = 1:2), Mp 188-190 °C.  $[\alpha]_D^{25} = +60.1$  (c 0.651, DCM), 90% ee, >20:1 d.r..

$^1\text{H}$  NMR (400 MHz, Chloroform-*d*)  $\delta$  7.86 (d,  $J = 1.9$  Hz, 1H), 7.84 – 7.85 (m, 1H), 7.82 – 7.83 (m, 1H), 7.79 – 7.81 (m, 1H), 7.46 (d,  $J = 1.4$  Hz, 1H), 7.44 (s, 1H), 7.42 (s, 4H), 7.40 – 7.41 (m, 1H), 7.25 (s, 1H), 7.22 – 7.23 (m, 3H), 7.21 (s, 1H), 7.20 (s, 1H), 7.19 (s, 1H), 7.18 (s, 1H), 7.13 (s, 1H), 7.11 (s, 1H), 7.08 – 7.10 (m, 3H), 7.06 (s, 2H), 7.04 (d,  $J = 2.0$  Hz), 6.94 (td,  $J = 7.8, 1.3$  Hz, 1H), 6.81 (s, 1H), 6.72 (s, 1H), 6.53 (s, 1H), 6.51 (s, 1H), 6.36 (ddd,  $J = 11.7, 9.2, 2.9$  Hz, 1H), 6.09 (d,  $J = 7.9$  Hz, 1H), 3.59 – 3.63 (m, 1H), 3.57 (d,  $J = 7.2$  Hz, 1H), 3.48 (dd,  $J = 15.2$  Hz, 1H).

$^{13}\text{C}$  NMR (100 MHz, Chloroform-*d*)  $\delta$  175.2, 169.1, 165.7, 153.8, 147.4, 142.7, 137.1, 136.7, 133.6, 131.6, 130.7, 130.6, 129.3, 129.1, 129.0, 128.9, 128.8, 128.6, 128.5, 128.3, 128.2, 128.1, 128.0, 127.8, 127.3, 126.3, 123.4, 122.9, 117.4, 115.6, 115.4, 112.5, 110.1, 85.9, 73.8, 58.7, 53.3, 49.9, 39.5.

HRMS (ESI+TOF):  $[\text{M}+\text{H}]^+$  Calcd for  $\text{C}_{55}\text{H}_{39}\text{FN}_4\text{O}_3$  823.3079. Found 823.3077.



HPLC analysis: (IA column, Hexane: 2-propanol = 80:20, flow rate = 0.8 mL/min, wavelength = 254 nm):  $R_{t1} = 16.495$ ,  $R_{t2} = 54.563$ .

**4i:(2'S,3R,3'R)-1-benzhydryl-6'-(4-chlorophenyl)-2'-(2-(3,5-diphenyl-1H-pyrazol-1-yl)-2-oxoethyl)-2-oxo-3'-phenyl-2',3'-dihydrospiro[indoline-3,4'-pyran]-5'-carbonitrile**

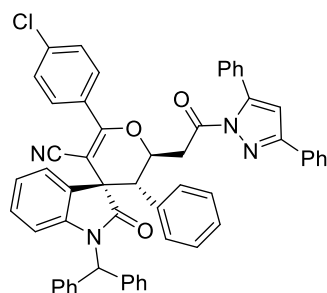

White solid, 79.1 mg, 94% yield (hexanes/Dichloromethane, v:v = 1:2), Mp 218-220 °C.  $[\alpha]_D^{25} = +60.2$  (c 0.751, DCM), 84% ee, >20:1 d.r..

$^1\text{H NMR}$  (400 MHz, chloroform-*d*)  $\delta$  7.86 (d,  $J = 1.9$  Hz, 1H), 7.84 (s, 1H), 7.76 (s, 1H), 7.73 (s, 1H), 7.45 (s, 1H), 7.44 (s, 2H), 7.42 (s, 4H), 7.41 (s, 2H), 7.34 - 7.36 (m, 3H), 7.25 (s, 1H), 7.23 (s, 2H), 7.21 (s, 1H), 7.20 (d,  $J = 2.1$  Hz, 2H), 7.18 (s, 1H), 7.12 (d,  $J = 7.4$  Hz, 2H), 7.04 - 7.09 (m, 4H), 6.94 (t,  $J = 7.8$  Hz, 1H), 6.81 (s, 1H), 6.72 (s, 1H), 6.53 (s, 1H), 6.51 (s, 1H), 6.35 (ddd,  $J = 11.4, 9.2, 2.9$  Hz, 1H), 6.09 (d,  $J = 8.0$  Hz, 1H), 3.63 - 3.56 (m, 2H), 3.48 (dd,  $J = 15.2, 9.2$  Hz, 1H).

$^{13}\text{C NMR}$  (100 MHz, chloroform-*d*)  $\delta$  175.1, 169.1, 165.6, 153.8, 147.4, 142.7, 137.2, 136.9, 136.7, 133.5, 131.5, 130.9, 130.7, 129.7, 129.3, 129.1, 129.0, 128.7, 128.6, 128.5, 128.4, 128.3, 128.2, 128.1, 128.0, 127.8, 127.3, 126.3, 123.4, 123.0, 117.2, 112.5, 110.1, 86.4, 73.9, 58.7, 53.3, 49.8, 39.4.

HRMS (ESI+TOF):  $[\text{M}+\text{H}]^+$  Calcd for  $\text{C}_{55}\text{H}_{39}\text{ClN}_4\text{O}_3$  839.2783. Found 839.2788.

HPLC analysis: (IA column, Hexane: 2-propanol = 80:20, flow rate = 0.8 mL/min, wavelength = 254 nm):  $R_{t1} = 16.017$ ,  $R_{t2} = 77.164$ .

**4j:(2'S,3R,3'R)-1-benzhydryl-6'-(4-bromophenyl)-2'-(2-(3,5-diphenyl-1H-pyrazol-1-yl)-2-oxoethyl)-2-oxo-3'-phenyl-2',3'-dihydrospiro[indoline-3,4'-pyran]-5'-carbonitrile**

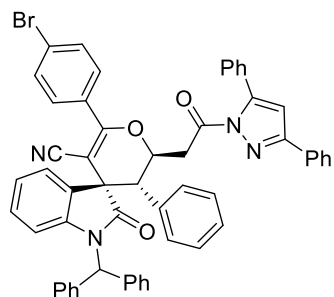

White solid, 87.5 mg, 99% yield (hexanes/Dichloromethane, v:v = 1:1), Mp 194-196 °C.  $[\alpha]_D^{25} = +62.0$  (c 0.864, DCM), 89% ee, >20:1 d.r..

$^1\text{H NMR}$  (400 MHz, chloroform-*d*)  $\delta$  7.77 (s, 1H), 7.75 (s, 1H), 7.60 (s, 1H), 7.58 (s, 1H), 7.42 (s, 1H), 7.40 (s, 1H), 7.34 (d,  $J = 8.0$  Hz, 4H), 7.32 (d,  $J = 8.5$  Hz, 5H), 7.29 – 7.28 (m, 1H), 7.18 – 7.16 (m, 1H), 7.13 (d,  $J = 7.7$  Hz, 3H), 7.11 – 7.09 (m, 4H), 7.03 (d,  $J = 7.8$  Hz, 2H), 7.00 (s, 1H), 6.96 (t,  $J = 6.4$  Hz, 2H), 6.84 (t,  $J = 7.8$  Hz, 1H), 6.72 (s, 1H), 6.62 (s, 1H), 6.43 (d,  $J = 7.6$  Hz, 2H), 6.27 (ddd,  $J = 11.5, 9.1, 2.9$  Hz, 1H), 6.00 (d,  $J = 8.0$  Hz, 1H), 3.53 – 3.48 (m, 2H), 3.40 (dd,  $J = 15.2, 9.1$  Hz, 1H).

$^{13}\text{C NMR}$  (100 MHz, chloroform-*d*)  $\delta$  175.1, 169.1, 165.6, 153.8, 147.4, 142.7, 136.9, 136.7, 133.5, 132.2, 131.56, 131.4, 130.7, 129.9, 129.5, 129.3, 129.0, 128.9, 128.7, 128.6, 128.5, 128.5, 128.3, 128.2, 128.1, 128.0, 127.8, 127.3, 127.0, 126.3, 125.7, 123.4, 123.0, 117.1, 112.5, 110.1, 86.4, 73.9, 58.7, 53.3, 49.8, 39.4.

HRMS (ESI+TOF):  $[\text{M}+\text{H}]^+$  Calcd for  $\text{C}_{55}\text{H}_{39}\text{BrN}_4\text{O}_3$  883.2278. Found 883.2281.

HPLC analysis: (IC column, Hexane: 2-propanol = 80:20, flow rate = 0.8 mL/min, wavelength = 254 nm):  $R_{t1} = 9.764$ ,  $R_{t2} = 16.967$ .

**4k: (2'S,3R,3'R)-1-benzhydryl-2'-(2-(3,5-diphenyl-1H-pyrazol-1-yl)-2-oxoethyl)-6'-(4-methoxyphenyl)-2-oxo-3'-phenyl-2',3'-dihydrospiro[indoline-3,4'-pyran]-5'-carbonitrile**

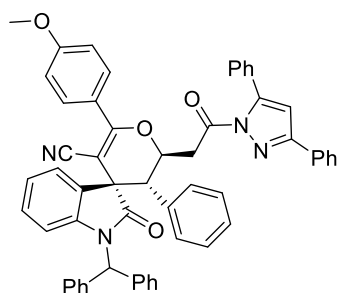

White solid, 76.2 mg, 91% yield (hexanes/Dichloromethane, v:v = 1:2), Mp 211-213 °C.  $[\alpha]_D^{25} = +56.7$  (c 0.565, DCM), 93% ee, >20:1 d.r..

$^1\text{H}$  NMR (400 MHz, chloroform-*d*)  $\delta$  7.79 (d,  $J$  = 1.8 Hz, 1H), 7.77 (t,  $J$  = 1.7 Hz, 1H), 7.71 (d,  $J$  = 2.0 Hz, 1H), 7.69 (d,  $J$  = 2.1 Hz, 1H), 7.39 (s, 1H), 7.36 – 7.37 (m, 2H), 7.35 (s, 3H), 7.34 (s, 1H), 7.18 (s, 5H), 7.15 (d,  $J$  = 1.7 Hz, 2H), 7.14 (s, 2H), 7.11 (d,  $J$  = 7.2 Hz, 2H), 7.04 (d,  $J$  = 7.6 Hz, 2H), 7.02 (s, 1H), 6.98 (t,  $J$  = 7.6 Hz, 2H), 6.85 (td,  $J$  = 7.8, 1.2 Hz, 1H), 6.81 (s, 1H), 6.79 (s, 1H), 6.74 (s, 1H), 6.64 (s, 1H), 6.46 (s, 1H), 6.45 (s, 1H), 6.25 – 6.30 (m, 1H), 6.01 (d,  $J$  = 7.9 Hz, 1H), 3.75 (s, 3H), 3.48 – 3.56 (m, 2H), 3.38 (dd,  $J$  = 15.2, 9.3 Hz, 1H).

$^{13}\text{C}$  NMR (100 MHz, chloroform-*d*)  $\delta$  175.4, 169.2, 166.4, 161.8, 153.8, 147.4, 142.7, 137.0, 136.8, 133.8, 131.6, 130.8, 130.1, 129.3, 129.2, 129.0, 128.9, 128.8, 128.6, 128.5, 128.3, 128.1, 128.0, 127.8, 127.2, 126.4, 124.8, 123.8, 122.9, 117.9, 113.6, 112.4, 110.1, 84.5, 73.6, 58.6, 55.4, 53.4, 50.1, 39.6.

HRMS (ESI+TOF):  $[\text{M}+\text{H}]^+$  Calcd for  $\text{C}_{56}\text{H}_{42}\text{N}_4\text{O}_4$  835.3279. Found 835.3270.

HPLC analysis: (IC column, Hexane: 2-propanol = 80:20, flow rate = 0.8 mL/min, wavelength = 254 nm):  $R_{t1}$  = 19.145,  $R_{t2}$  = 28.956.

**5:2-((2'S,3R,3'R)-1-benzhydryl-5'-cyano-2-oxo-3',6'-diphenyl-2',3'-dihydrospiro[indoline-3,4'-pyran]-2'-yl)-N-benzylacetamide**

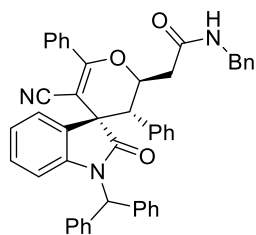

White solid, 58.9 mg, 85% yield (hexanes/ ethyl acetate, v:v = 2:1), Mp 206-208 °C.  $[\alpha]_D^{25}$  = + 37.2 (*c* 0.574, DCM), 99% ee, >20:1 d.r..

$^1\text{H}$  NMR (400 MHz, chloroform-*d*)  $\delta$  7.66 (d,  $J$  = 7.6 Hz, 2H), 7.38 – 7.27 (m, 4H), 7.17 (s, 2H), 7.16 – 7.15 (m, 2H), 7.15 (d,  $J$  = 2.0 Hz, 1H), 7.14 (s, 1H), 7.14 – 7.13 (m, 2H), 7.12 – 7.11 (m, 3H), 7.10 – 7.10 (m, 2H), 7.03 (d,  $J$  = 7.6 Hz, 2H), 6.99 (d,  $J$  = 6.4 Hz, 1H), 6.97 – 6.91 (m, 2H), 6.83 (td,  $J$  = 7.8, 1.2 Hz, 1H), 6.73 (s, 1H), 6.43 (d,  $J$  = 7.7 Hz, 2H), 6.05 – 5.96 (m, 2H), 5.92 (t,  $J$  = 5.8 Hz, 1H), 4.38 – 4.28 (m, 2H), 3.42 (d,  $J$  = 11.0 Hz, 1H), 2.55 (dd,  $J$  = 15.1, 3.1 Hz, 1H), 2.27 (dd,  $J$  = 15.1, 8.2 Hz, 1H).

$^{13}\text{C}$  NMR (100 MHz, chloroform-*d*)  $\delta$  175.4, 168.6, 166.8, 142.7, 137.9, 136.9, 136.7, 133.7, 132.5, 131.2, 128.9, 128.8, 128.7, 128.6, 128.5, 128.4, 128.3, 128.1, 128.0, 127.8, 127.6, 127.3, 123.3, 122.9, 117.3, 112.5, 86.4, 74.1, 58.7, 53.3, 49.8, 43.7, 39.8.

HRMS (ESI+TOF):  $[\text{M}+\text{H}]^+$  Calcd for  $\text{C}_{47}\text{H}_{37}\text{N}_3\text{O}_3$  692.2908. Found 692.2900.

HPLC analysis: (IC column, Hexane: 2-propanol = 85:15, flow rate = 0.6 mL/min, wavelength = 254 nm):  $R_{t1} = 33.406$ ,  $R_{t2} = 38.946$ .

**6.(2'S,3R,3'R)-1-benzhydryl-2'-(2-hydroxyethyl)-2-oxo-3',6'-diphenyl-2',3'-dihydrospiro[indoline-3,4'-pyran]-5'-carbonitrile**

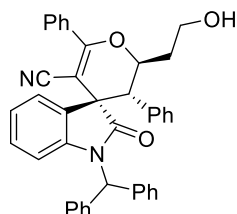

White solid, 58.5 mg, 99% yield (hexanes/ ethyl acetate, v:v = 3:1), Mp 190-192 °C.  $[\alpha]_D^{25} = +59.3$  (c 0.582, DCM), 93% ee, >20:1 d.r..

$^1\text{H}$  NMR (400 MHz, Chloroform-*d*)  $\delta$  7.75 (d,  $J = 1.6$  Hz, 1H), 7.74 (d,  $J = 1.9$  Hz, 1H), 7.38 – 7.36 (m, 1H), 7.35 (d,  $J = 2.0$  Hz, 1H), 7.32 – 7.34 (m, 2H), 7.18 – 7.16 (m, 2H), 7.14 – 7.13 (m, 2H), 7.12 (d,  $J = 2.0$  Hz, 2H), 7.11 – 7.06 (m, 3H), 7.04 – 7.01 (m, 2H), 6.99 (d,  $J = 2.0$  Hz, 1H), 6.93 (t,  $J = 7.6$  Hz, 2H), 6.82 (td,  $J = 7.8, 1.3$  Hz, 1H), 6.73 (s, 1H), 6.43 (d,  $J = 7.4$  Hz, 2H), 5.98 (d,  $J = 7.9$  Hz, 1H), 5.74 (ddd,  $J = 11.5, 9.7, 2.3$  Hz, 1H), 3.80 (ddt,  $J = 14.6, 10.8, 5.3$  Hz, 2H), 3.25 (d,  $J = 11.0$  Hz, 1H), 2.06 – 1.97 (m, 1H), 1.84 (dtd,  $J = 14.4, 7.7, 7.1, 2.4$  Hz, 1H), 1.62 (ddt,  $J = 14.9, 10.3, 5.4$  Hz, 1H).

$^{13}\text{C}$  NMR (100 MHz, Chloroform-*d*)  $\delta$  174.6, 166.0, 141.6, 135.9, 135.6, 133.1, 131.7, 130.2, 128.1, 127.8, 127.5, 127.4, 127.3, 127.2, 127.0, 126.8, 126.7, 126.3, 122.2, 121.9, 116.5, 111.5, 84.9, 73.7, 58.1, 57.6, 52.4, 49.6, 34.2.

HRMS (ESI+TOF):  $[\text{M}+\text{H}]^+$  Calcd for  $\text{C}_{40}\text{H}_{32}\text{N}_2\text{O}_3$  589.2486. Found 589.2489.

HPLC analysis: (IA column, Hexane: 2-propanol = 80:20, flow rate = 0.8 mL/min, wavelength = 254 nm):  $R_{t1} = 8.790$ ,  $R_{t2} = 42.218$ .

VII.  $^1\text{H}$  NMR and  $^{13}\text{C}$  NMR spectra.

**3a-a:(2'S,3R,3'R)-1-benzyl-2'-(2-(3,5-dimethyl-1H-pyrazol-1-yl)-2-oxoethyl)-2-oxo-3',6'-diphenyl-2',3'-dihydrospiro[indoline-3,4'-pyran]-5'-carbonitrile**

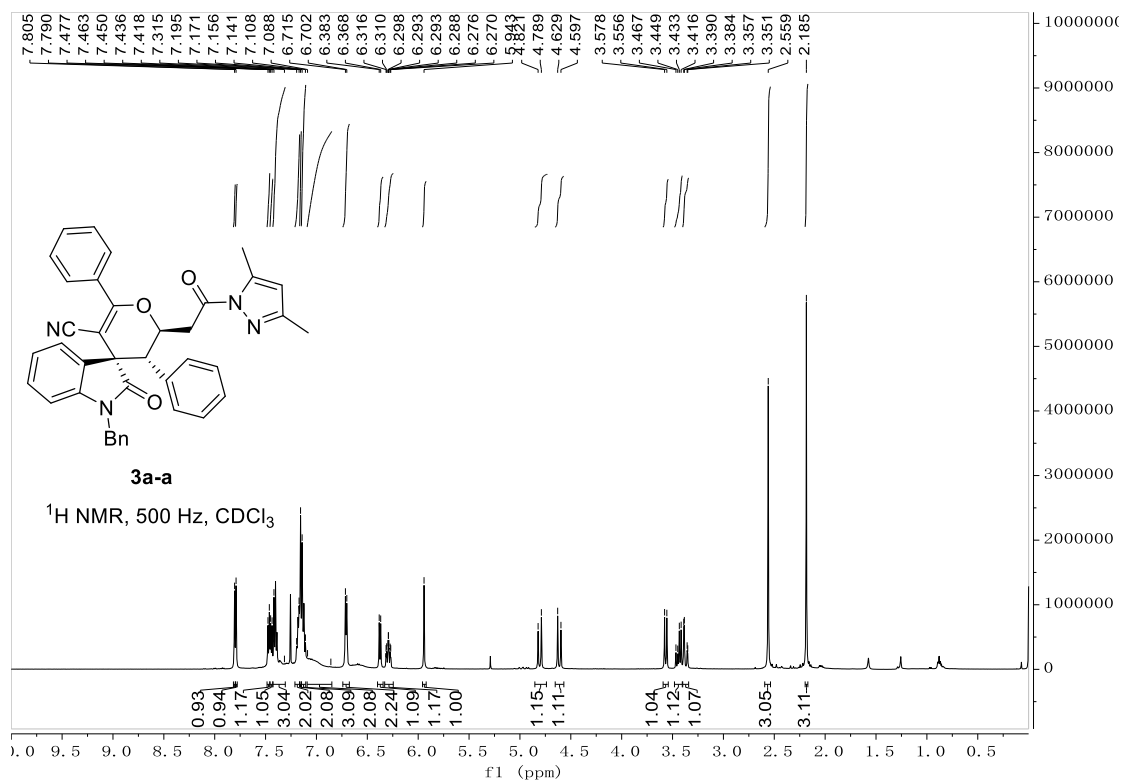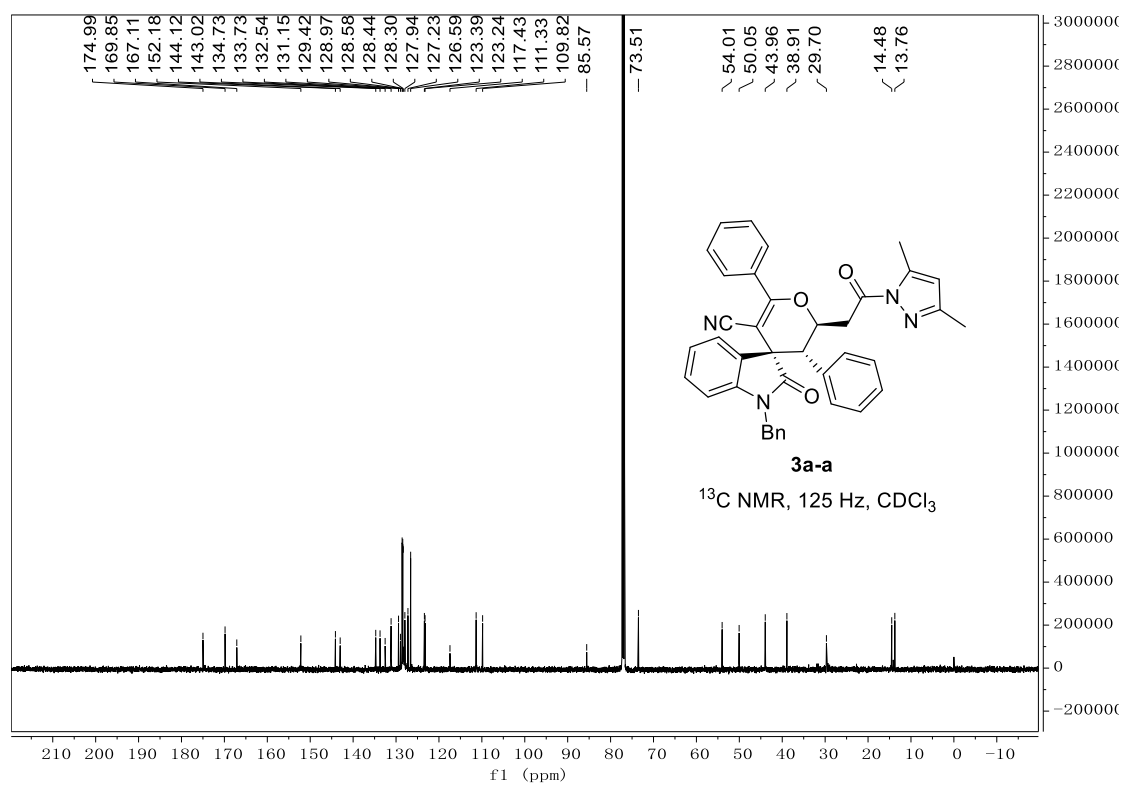

**3a: (2'S,3R,3'R)-1-benzhydryl-2'-(2-(3,5-diphenyl-1H-pyrazol-1-yl)-2-oxoethyl)-2-oxo-3',6'-diphenyl-2',3'-dihydrospiro[indoline-3,4'-pyran]-5'-carbonitrile**

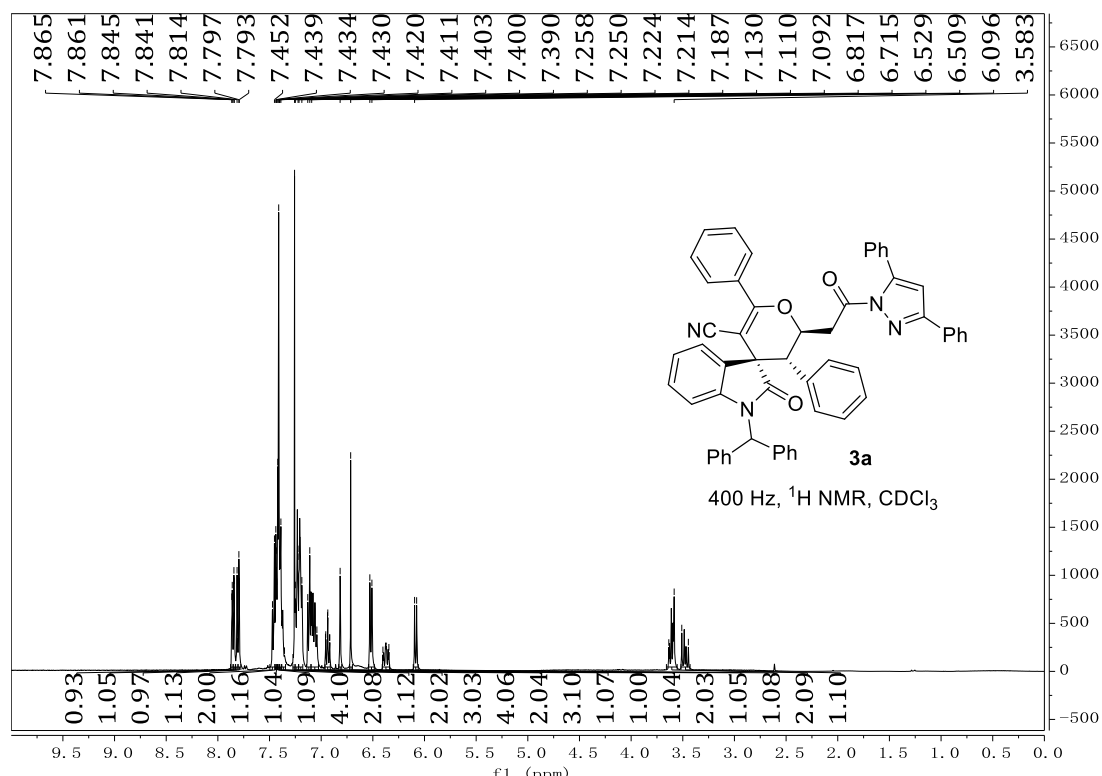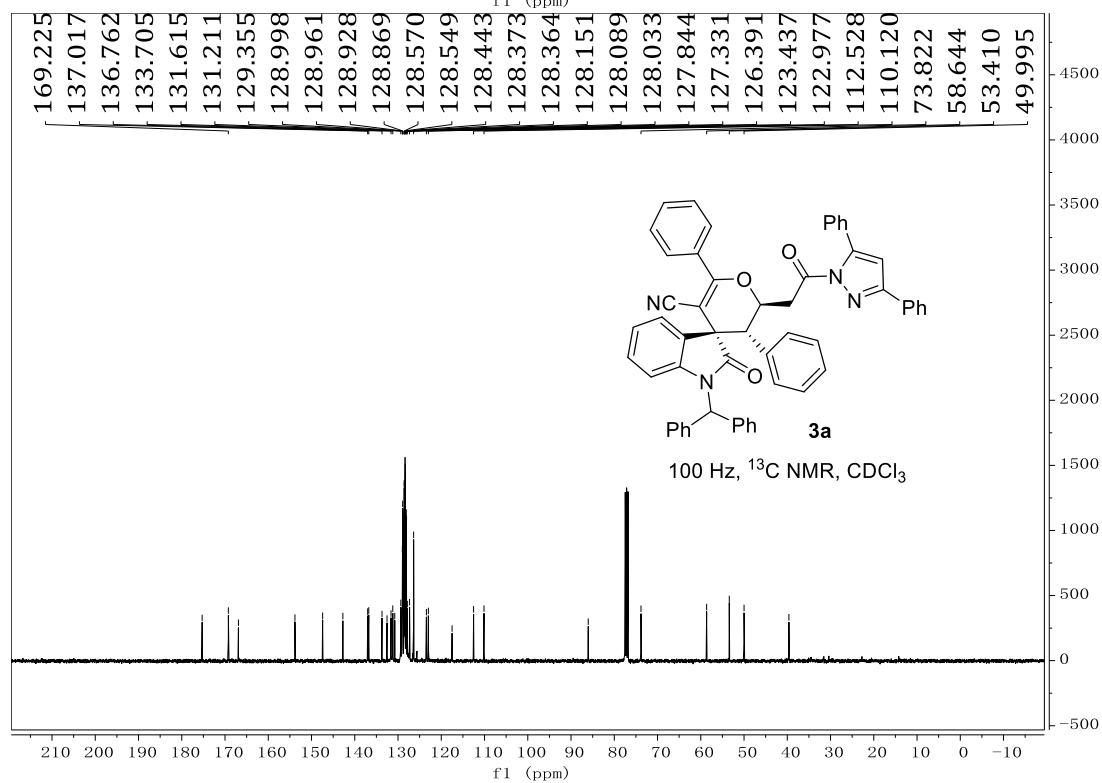

**3b: (2'S,3R,3'R)-1-benzhydryl-3'-(3-bromophenyl)-2'-(2-(3,5-diphenyl-1H-pyrazol-1-yl)-2-oxoethyl)-2-oxo-6'-phenyl-2',3'-dihydrospiro[indoline-3,4'-pyran]-5'-carbonitrile**

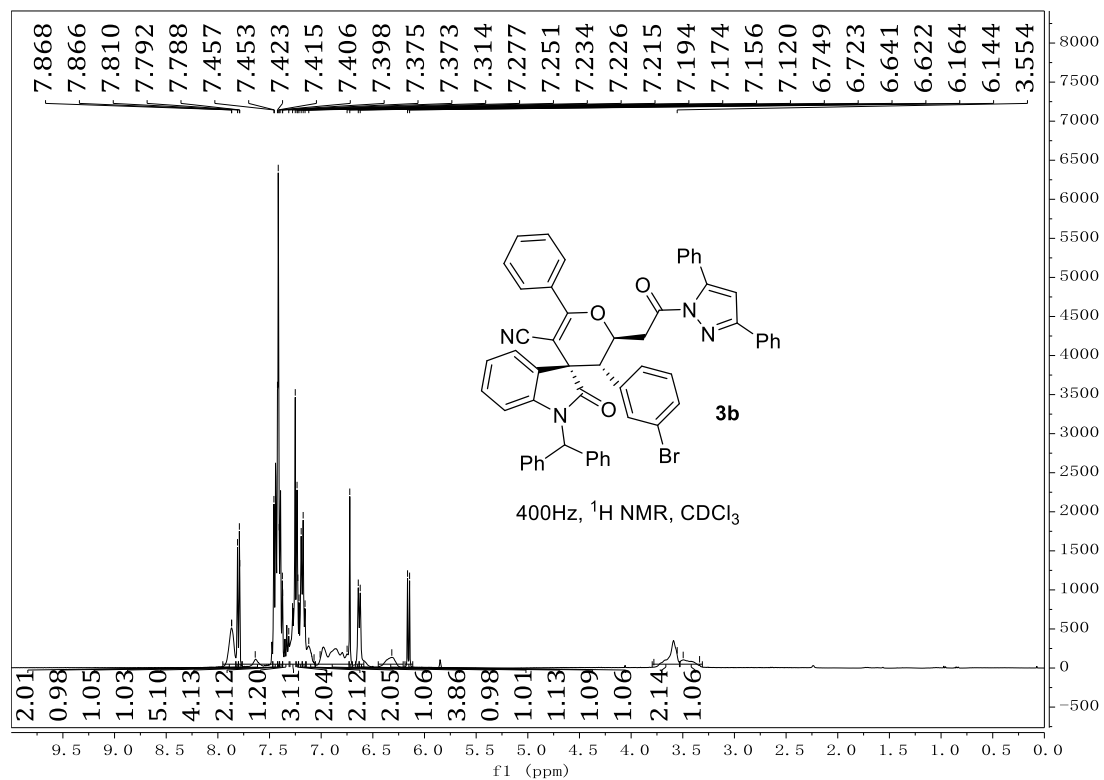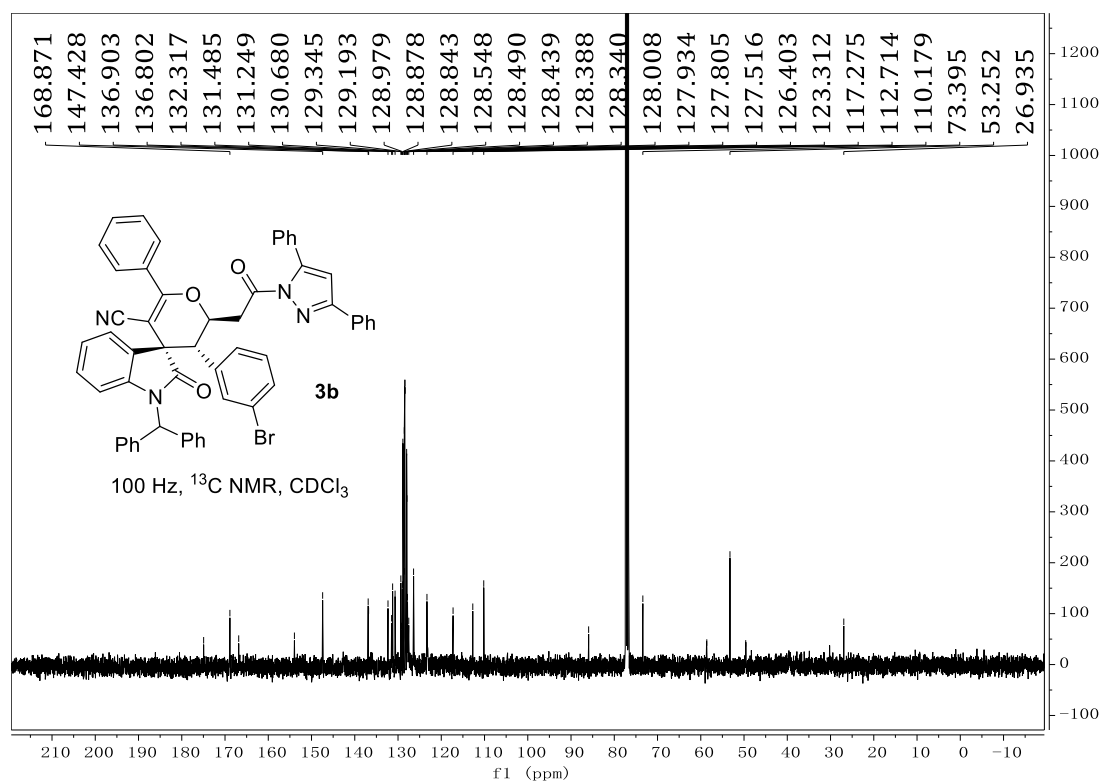

**3c: (2'S,3R,3'R)-1-benzhydryl-2'-(2-(3,5-diphenyl-1H-pyrazol-1-yl)-2-oxoethyl)-3'-(3-fluorophenyl)-2-oxo-6'-phenyl-2',3'-dihydrospiro[indoline-3,4'-pyran]-5'-carbonitrile**

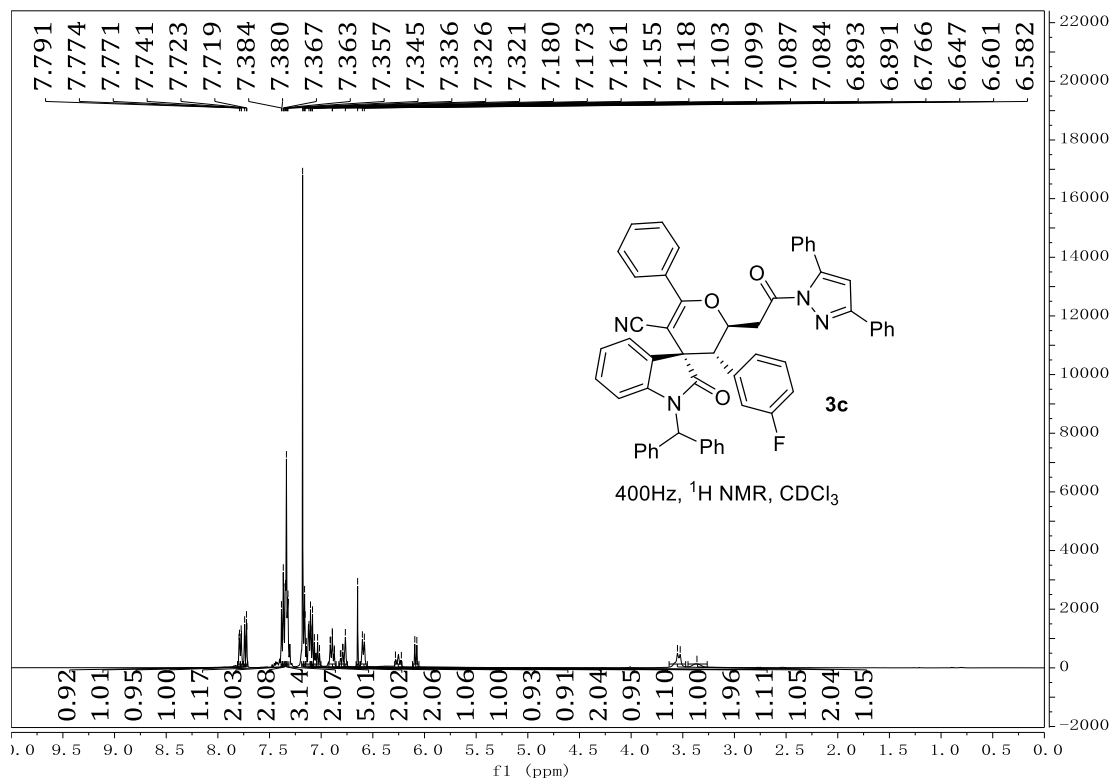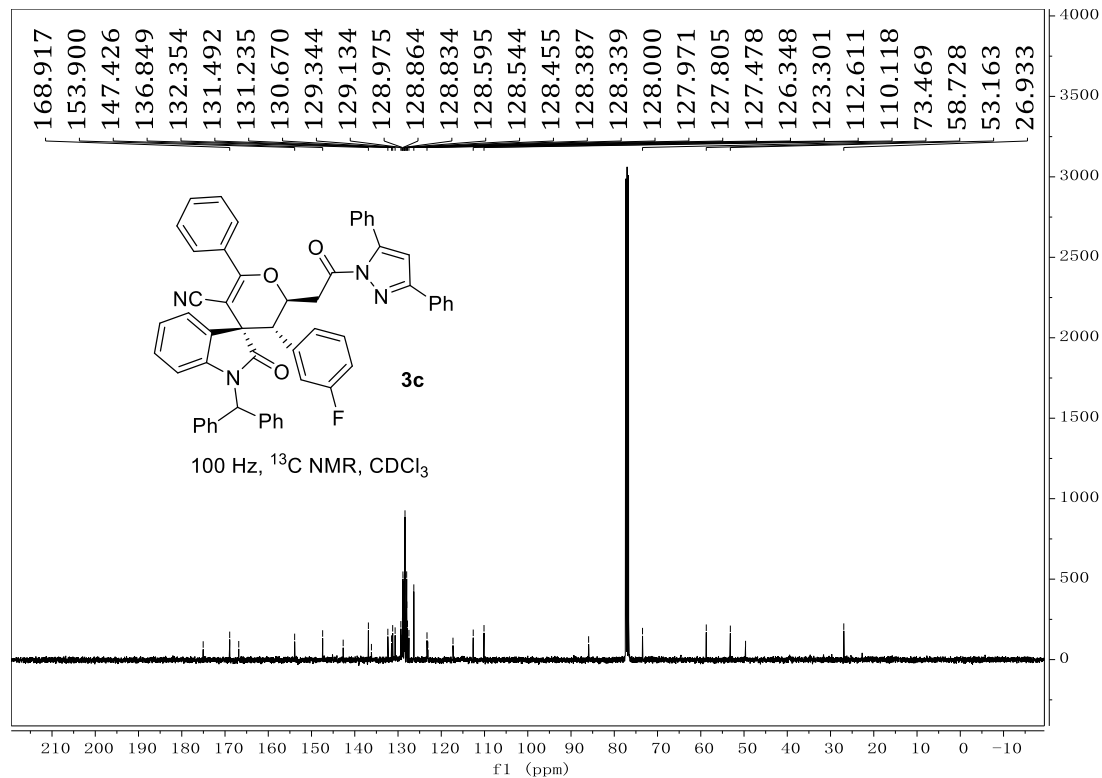



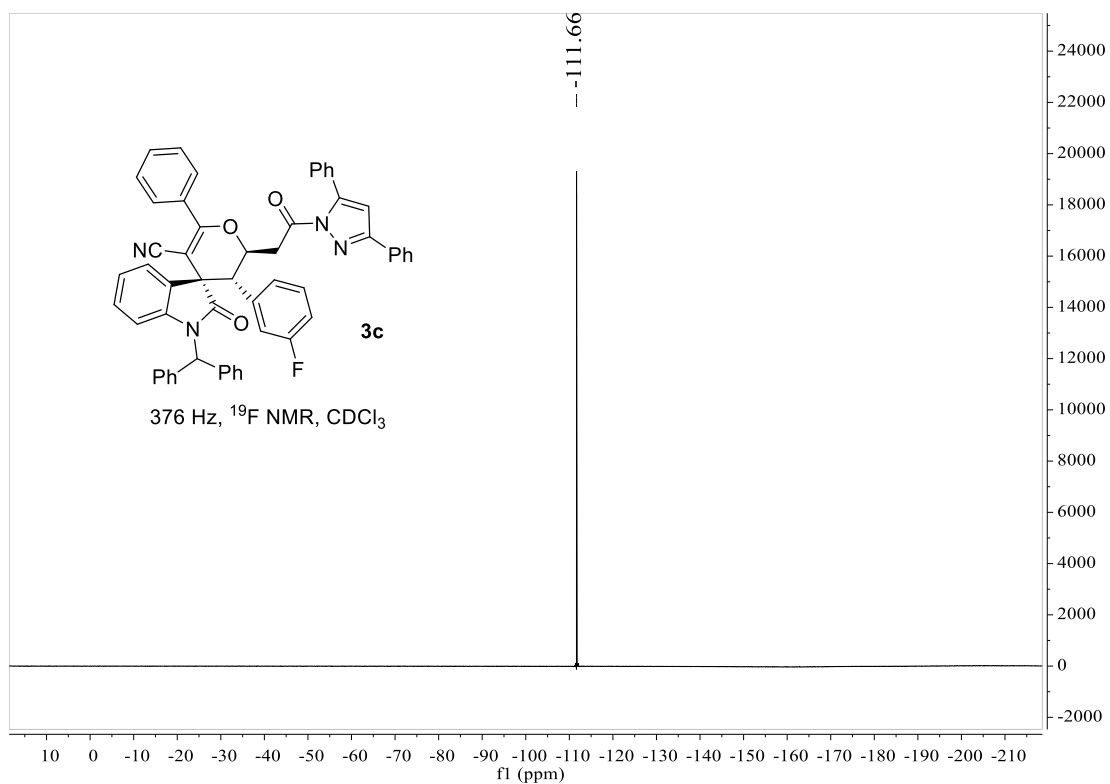

**3d: (2'S,3R,3'R)-1-benzhydryl-3'-(3-chlorophenyl)-2'-(2-(3,5-diphenyl-1H-pyrazol-1-yl)-2-oxoethyl)-2-oxo-6'-phenyl-2',3'-dihydrospiro[indoline-3,4'-pyran]-5'-carbonitrile**

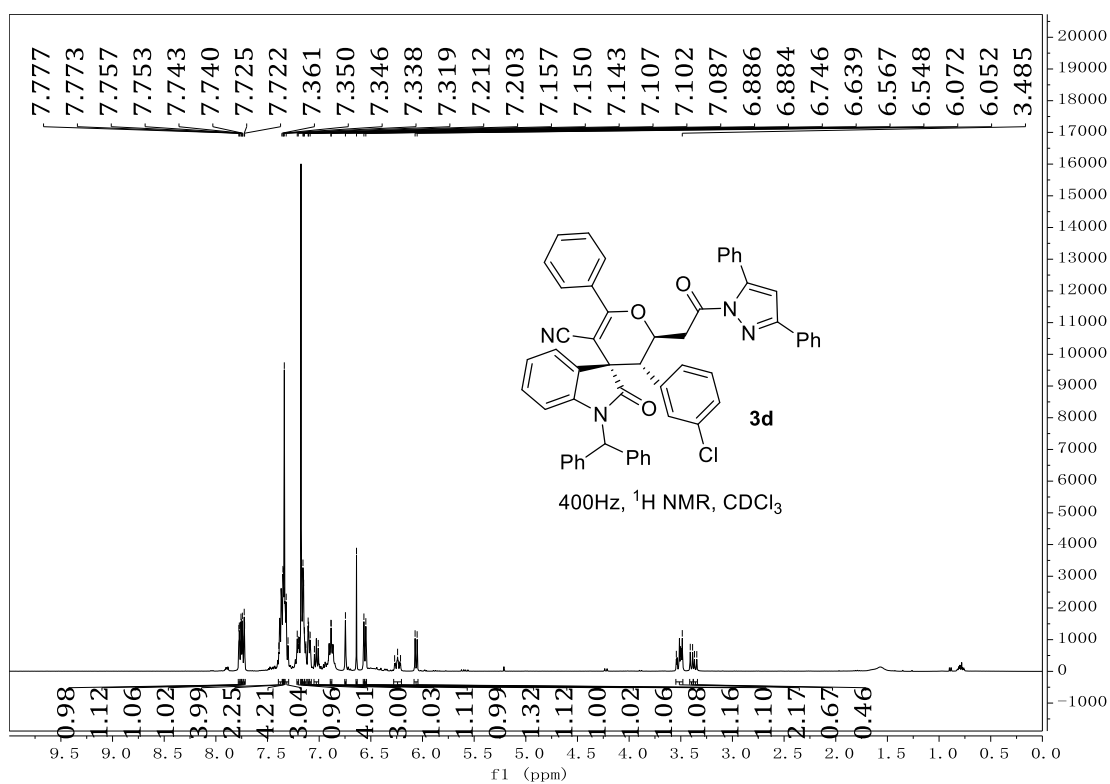

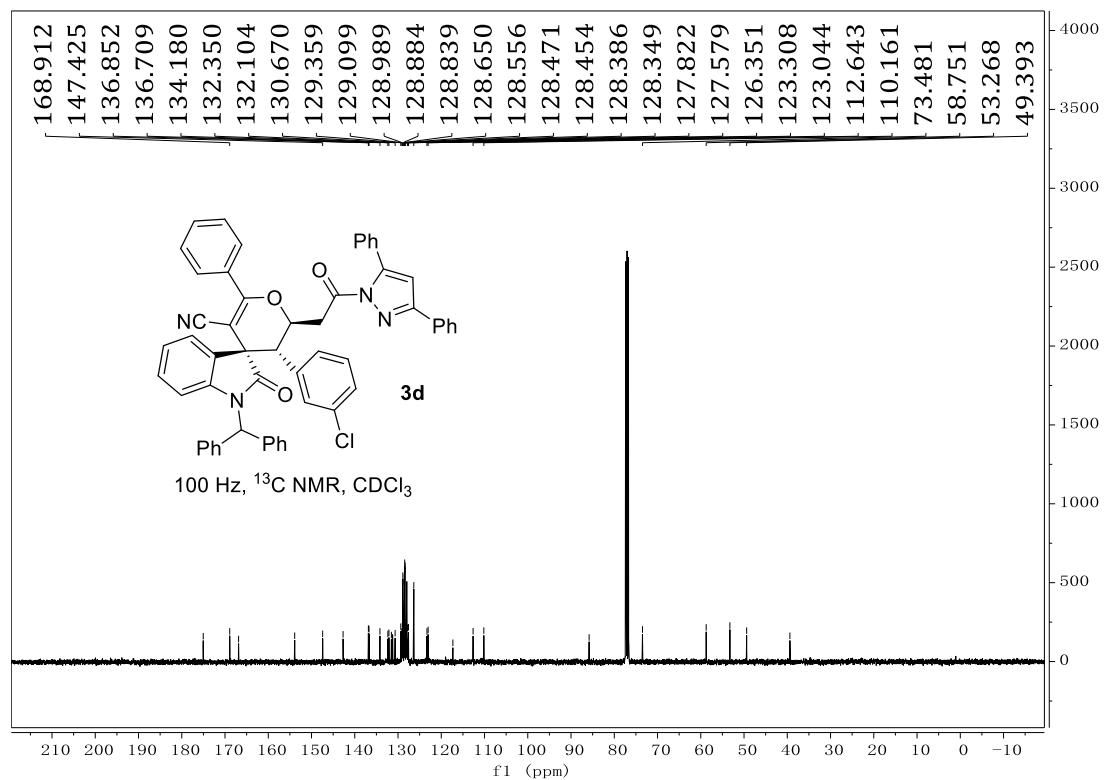

**3e: (2'S,3R,3'R)-1-benzhydryl-2'-(2-(3,5-diphenyl-1H-pyrazol-1-yl)-2-oxoethyl)-2-oxo-6'-phenyl-3'-(m-tolyl)-2',3'-dihydrospiro[indoline-3,4'-pyran]-5'-carbonitrile**

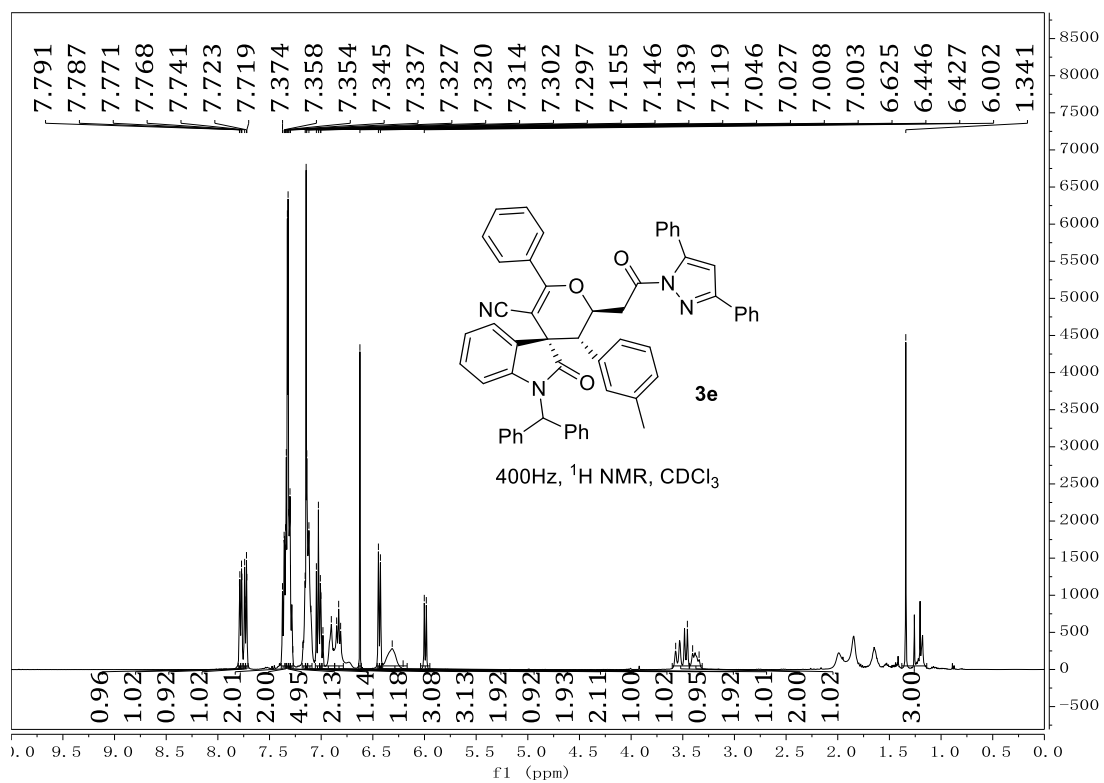

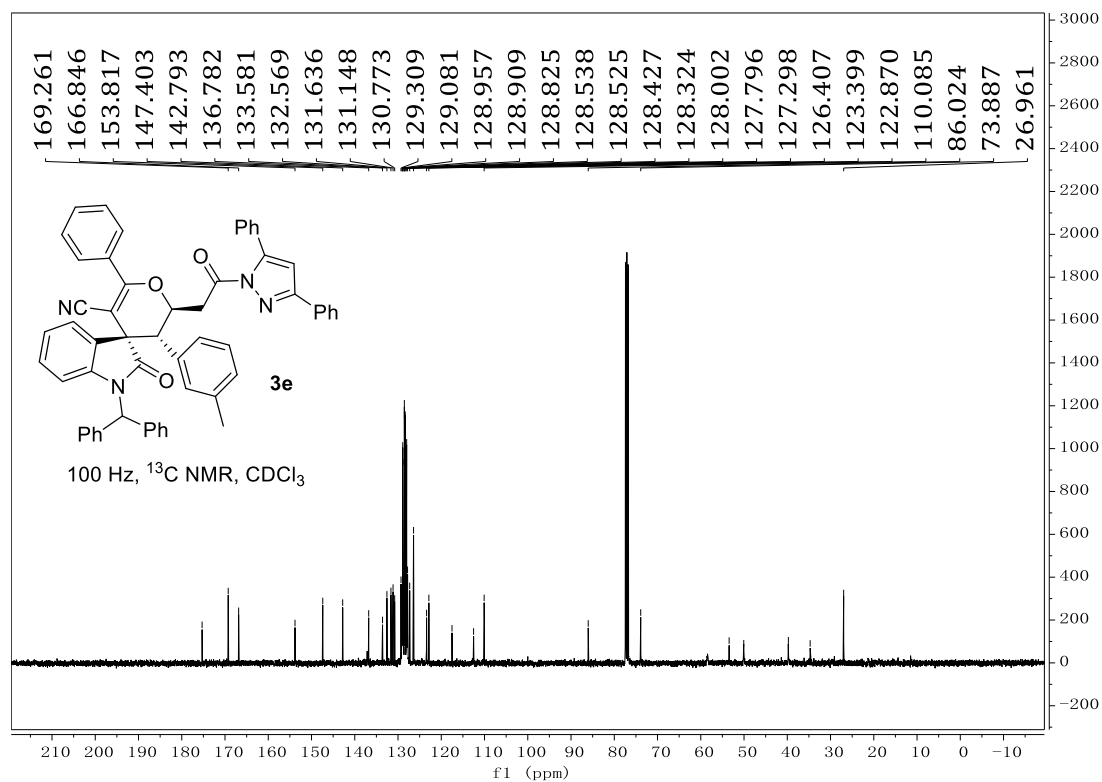

**3f: (2'S,3R,3'R)-1-benzhydryl-2'-(2-(3,5-diphenyl-1H-pyrazol-1-yl)-2-oxoethyl)-3'-(4-methoxyphenyl)-2-oxo-6'-phenyl-2',3'-dihydrospiro[indoline-3,4'-pyran]-5'-carbonitrile**

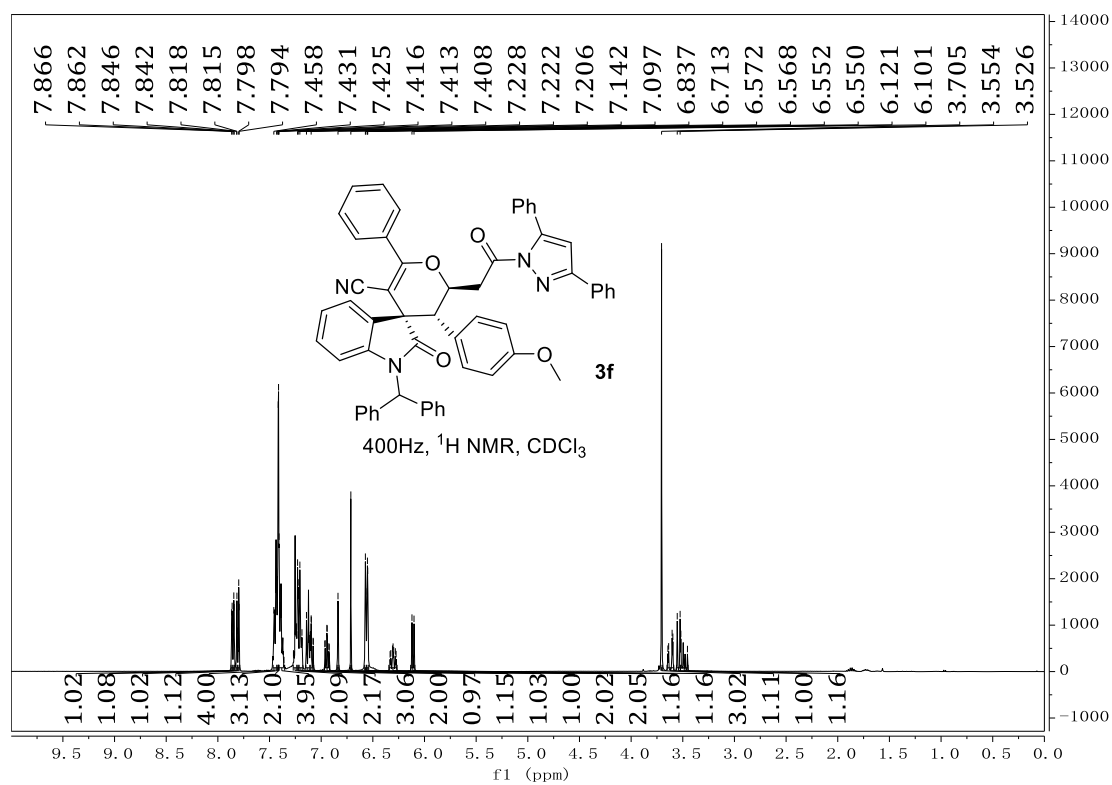

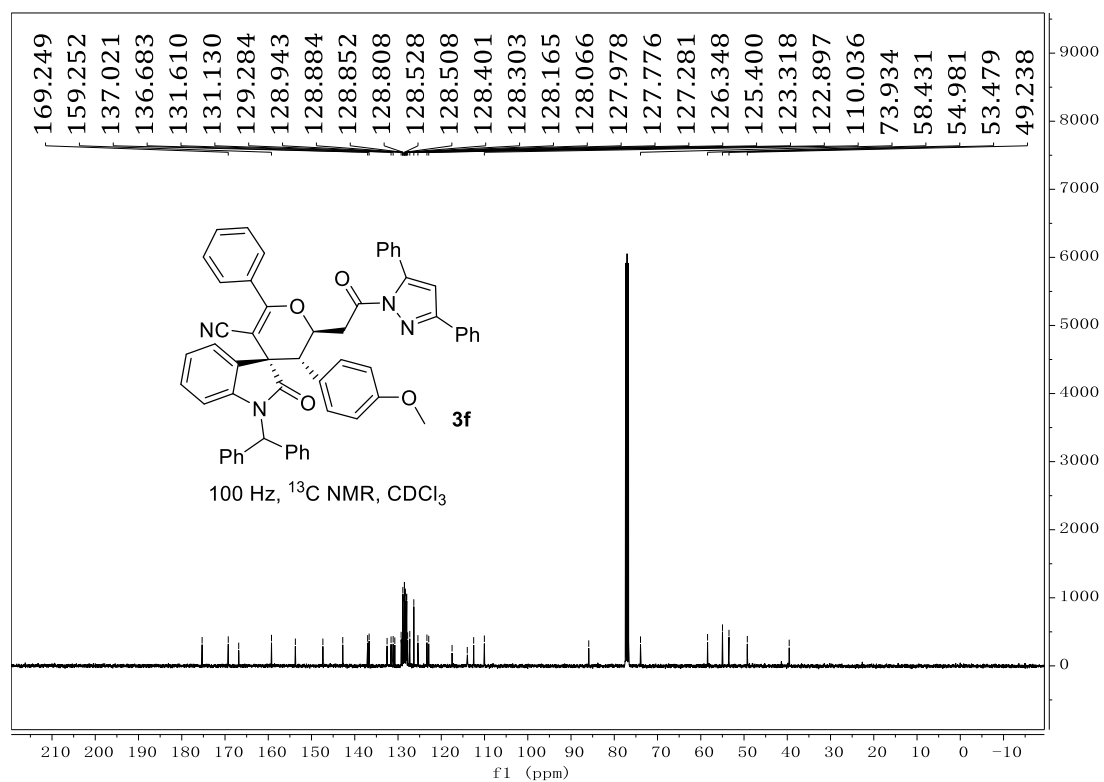

**3g: (2'S,3R,3'R)-1-benzhydryl-2'-(2-(3,5-diphenyl-1H-pyrazol-1-yl)-2-oxoethyl)-2-oxo-6'-phenyl-3'-(p-tolyl)-2',3'-dihydrospiro[indoline-3,4'-pyran]-5'-carbonitrile**

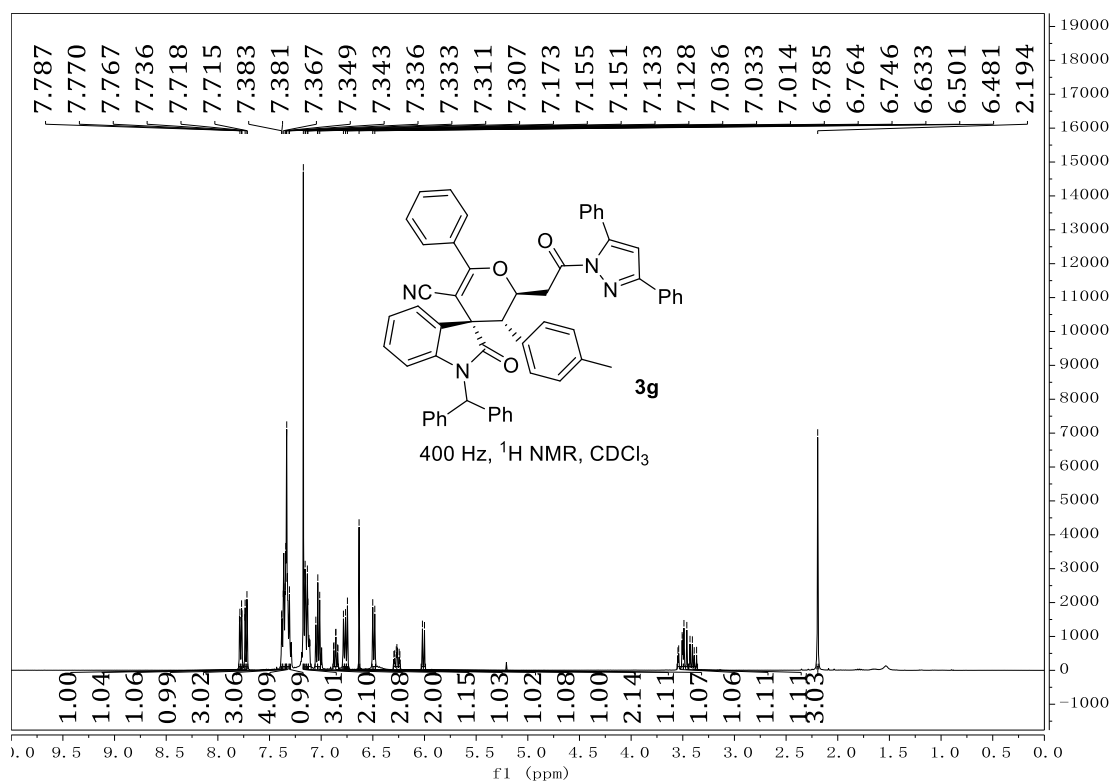

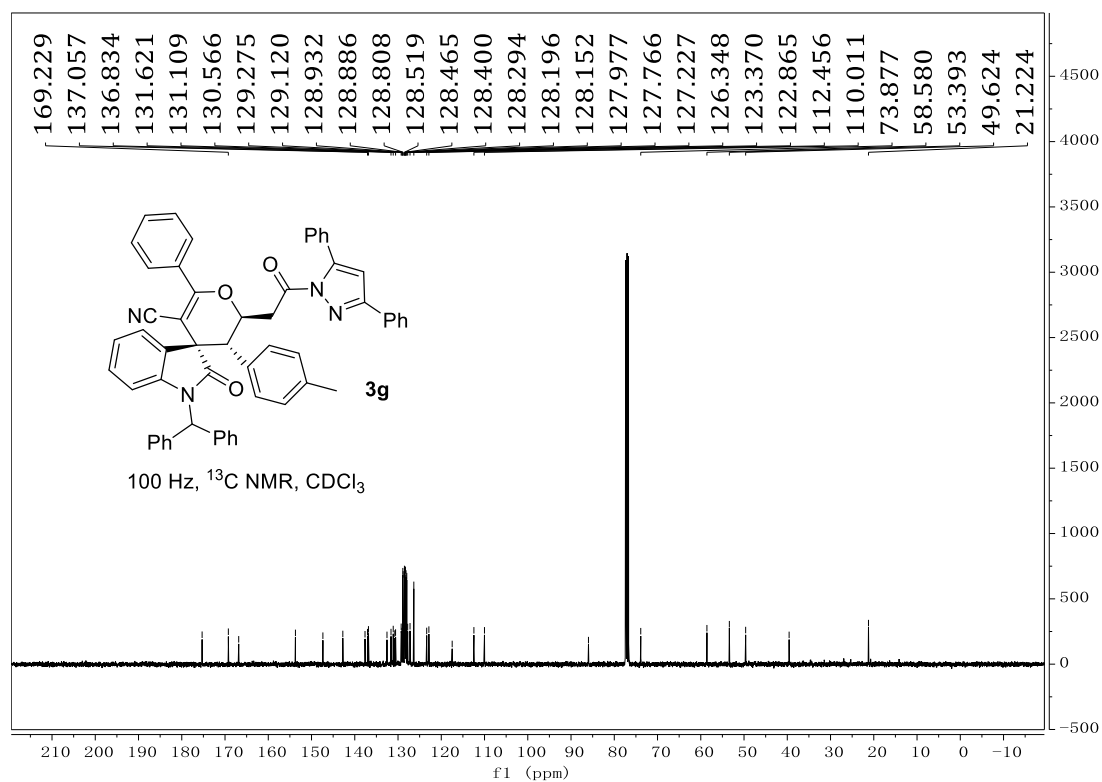

**3h: (2'S,3R,3'R)-1-benzhydryl-2'-(2-(3,5-diphenyl-1H-pyrazol-1-yl)-2-oxoethyl)-2-oxo-6'-phenyl-3'-(o-tolyl)-2',3'-dihydrospiro[indoline-3,4'-pyran]-5'-carbonitrile**

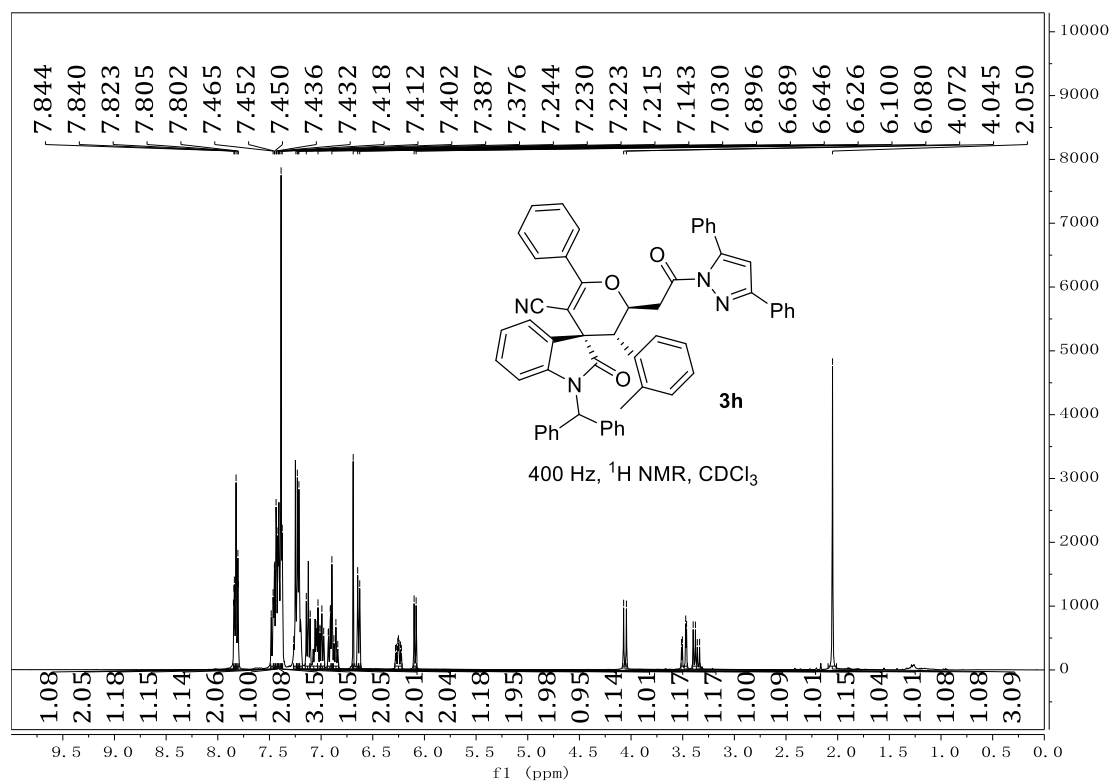

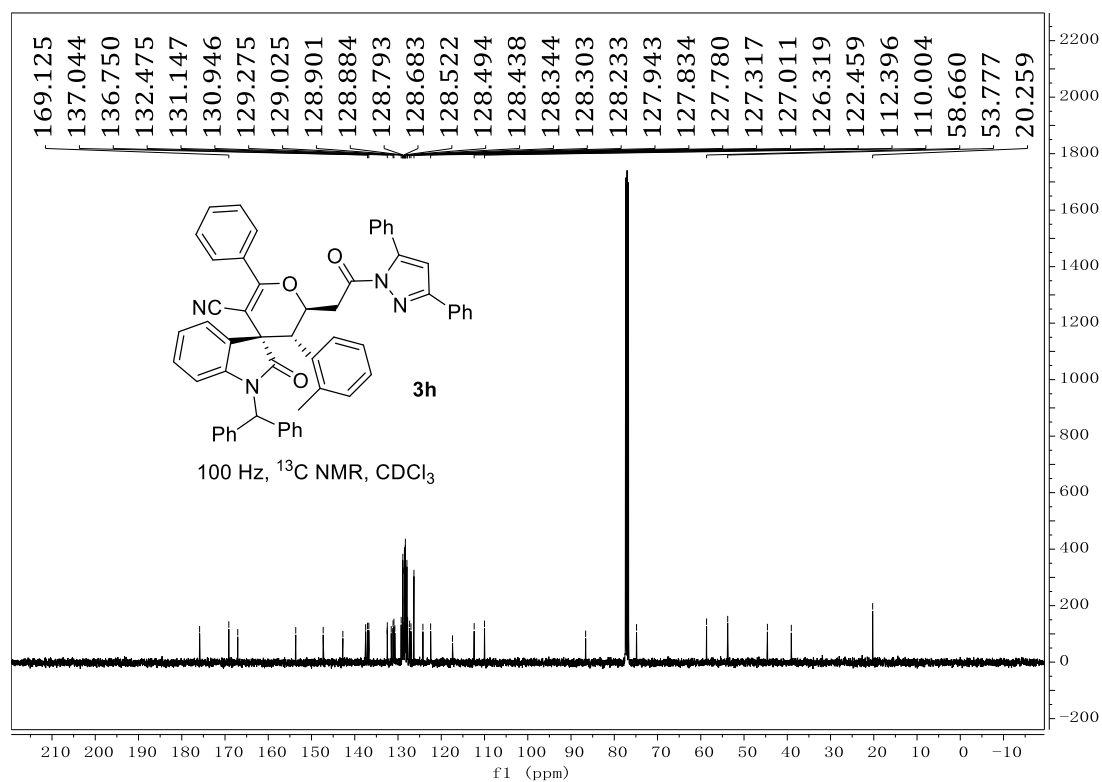

**3i:**(2'S,3R,3'R)-1-benzhydryl-2'-(2-(3,5-diphenyl-1H-pyrazol-1-yl)-2-oxoethyl)-3'-(2-fluorophenyl)-2-oxo-6'-phenyl-2',3'-dihydrospiro[indoline-3,4'-pyran]-5'-carbonitrile

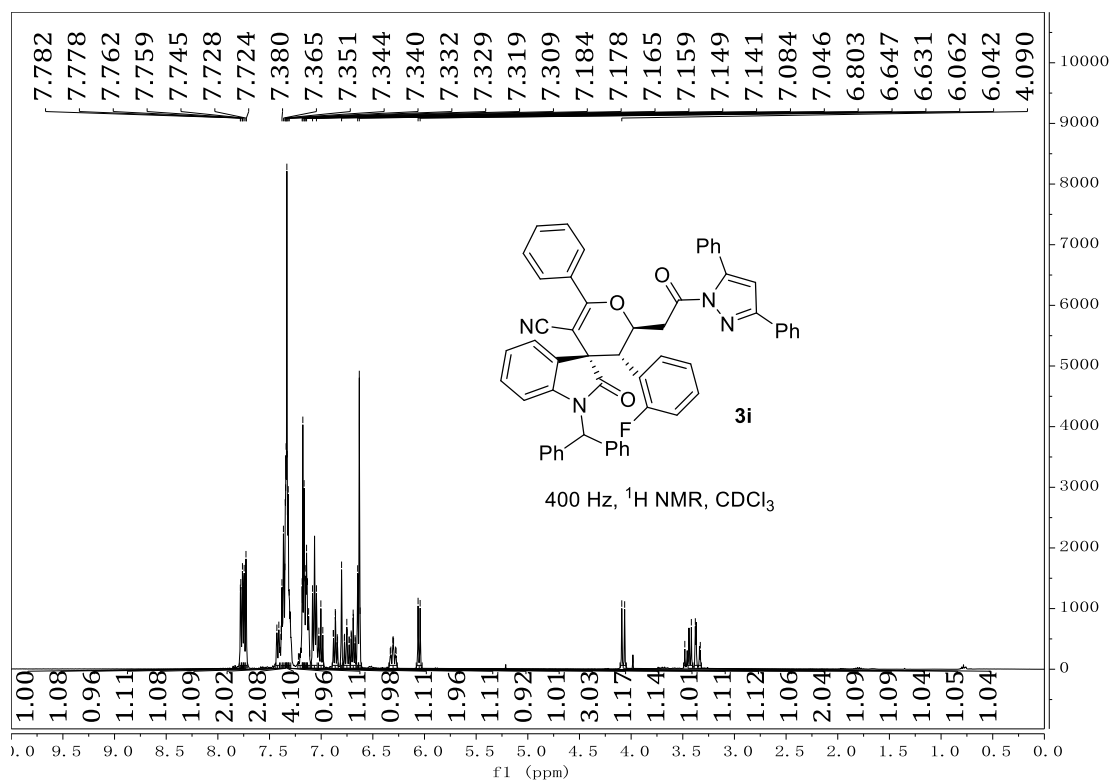

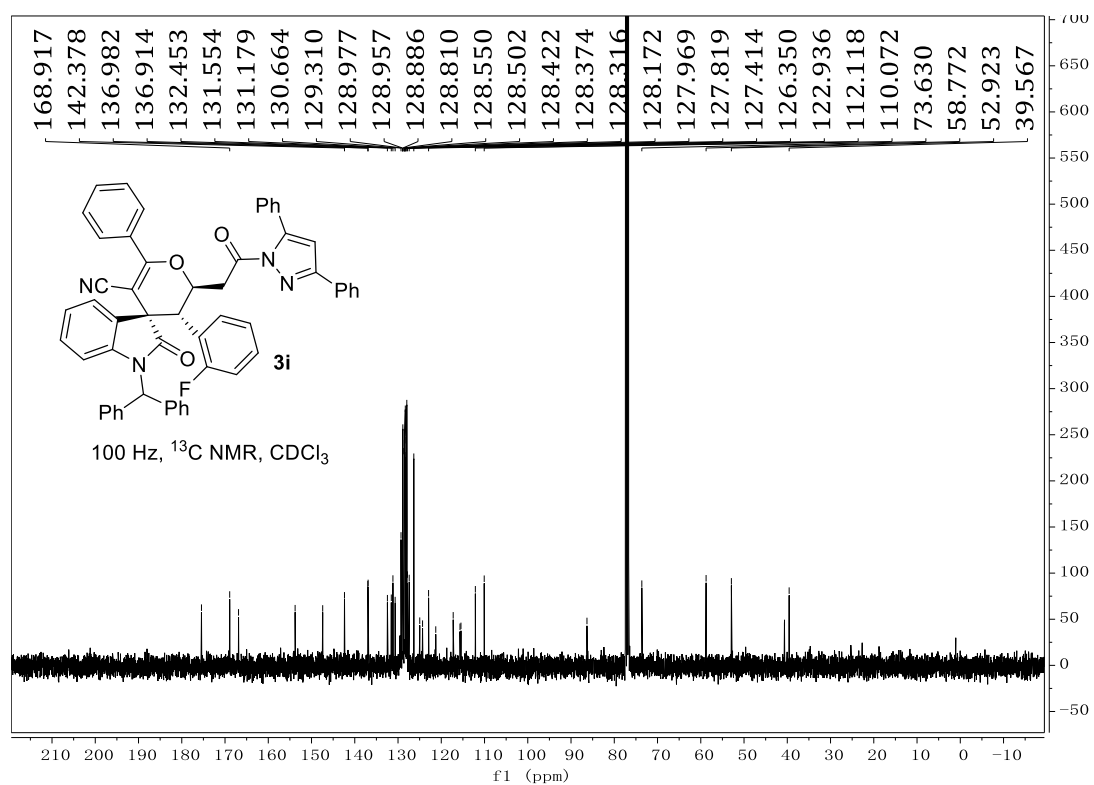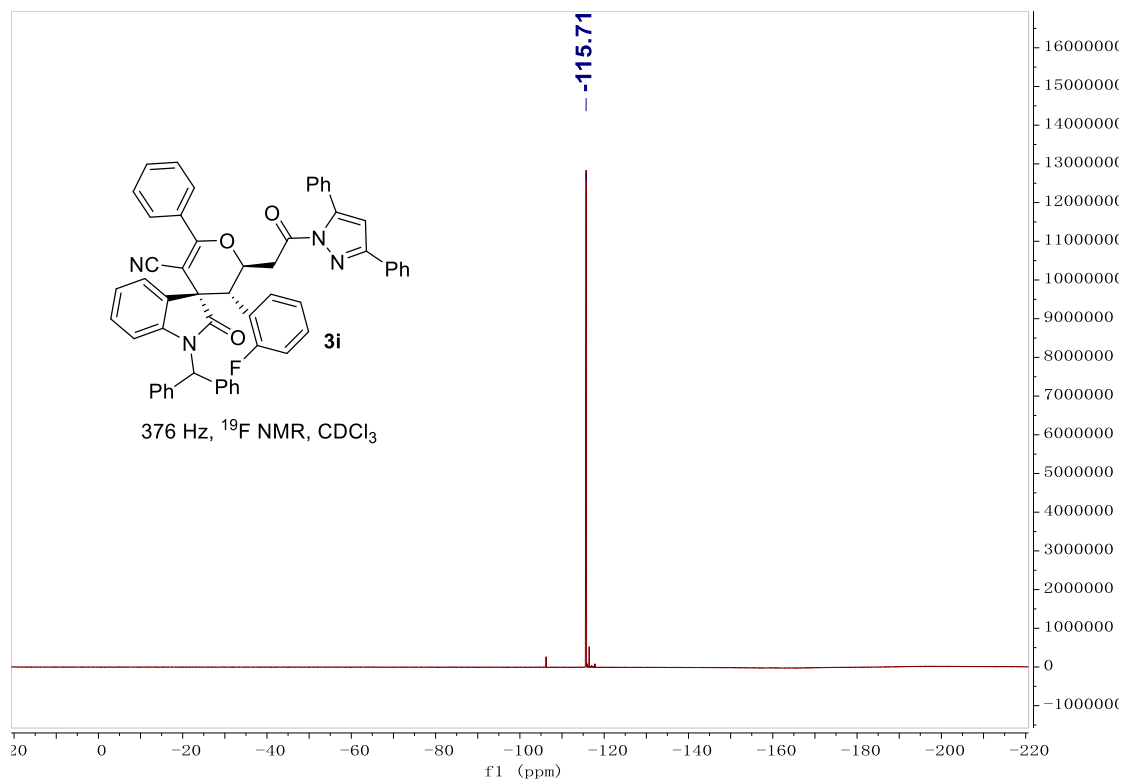

**3j:**(2'S,3R,3'R)-1-benzhydryl-3'-(3,5-dimethylphenyl)-2'-(2-(3,5-diphenyl-1H-pyrazol-1-yl)-2-oxoethyl)-2-oxo-6'-phenyl-2',3'-dihydrospiro[indoline-3,4'-pyran]-5'-carbonitrile

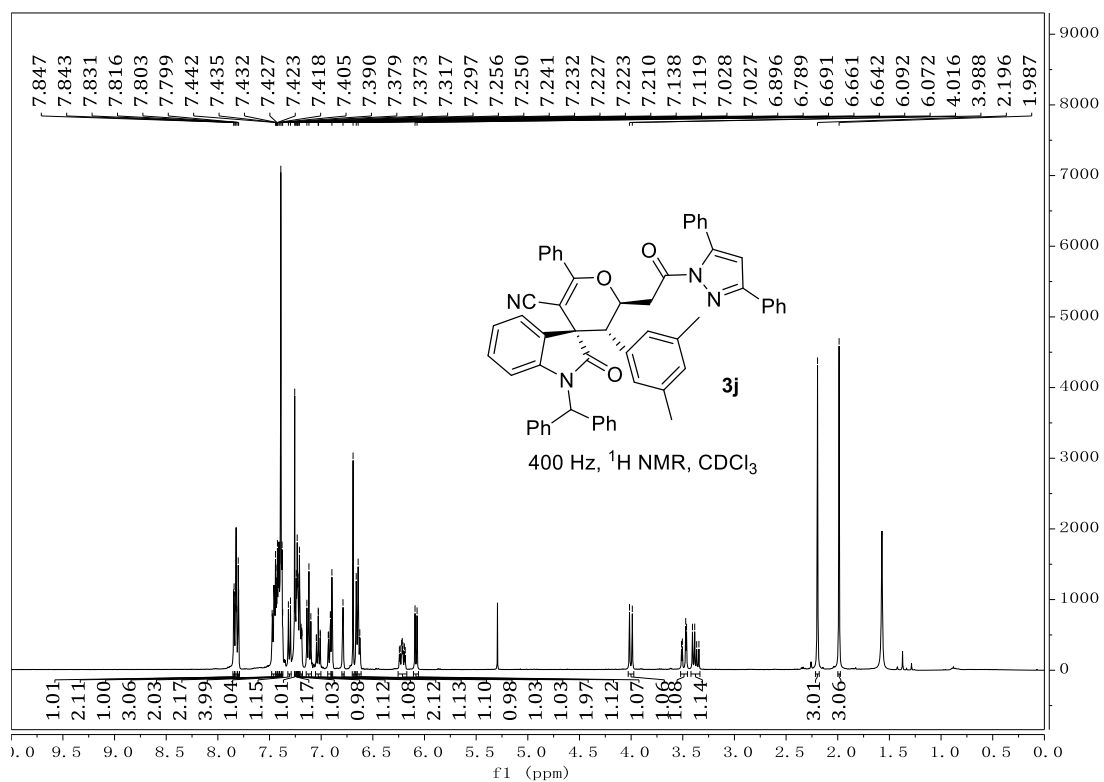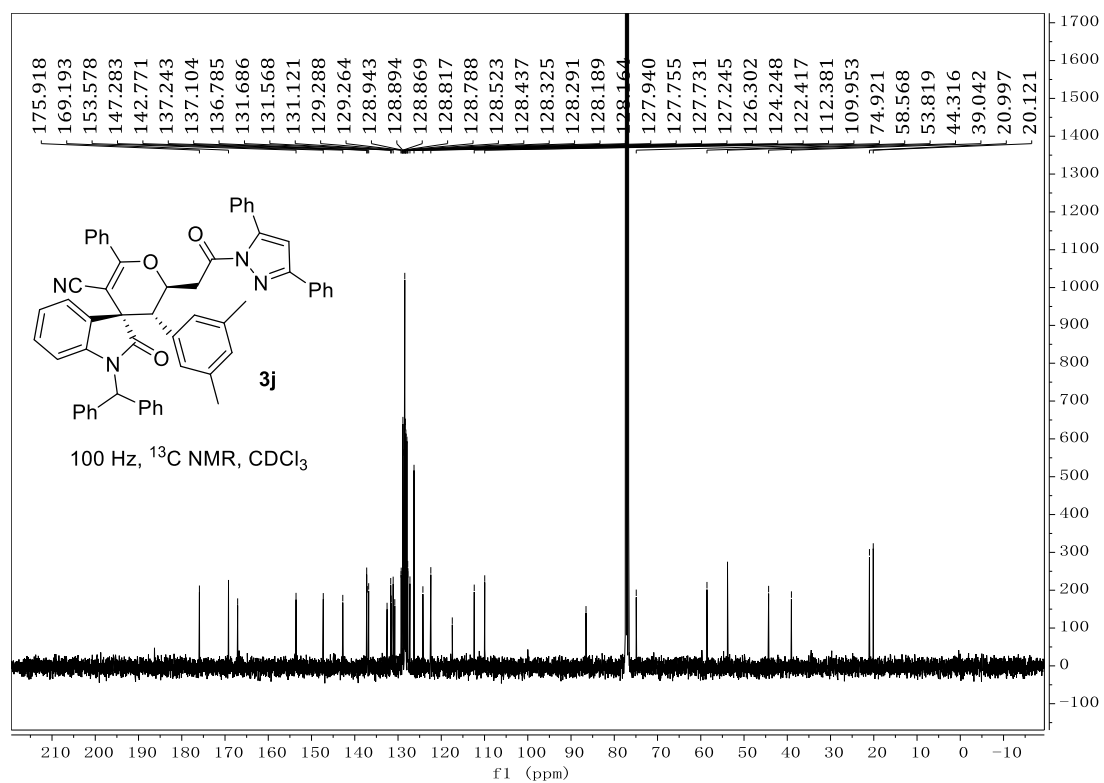

**3k: (2'S,3R,3'R)-1-benzhydryl-2'-(2-(3,5-diphenyl-1H-pyrazol-1-yl)-2-oxoethyl)-2-oxo-6'-phenyl-3'-(thiophen-2-yl)-2',3'-dihydrospiro[indoline-3,4'-pyran]-5'-carbonitrile**



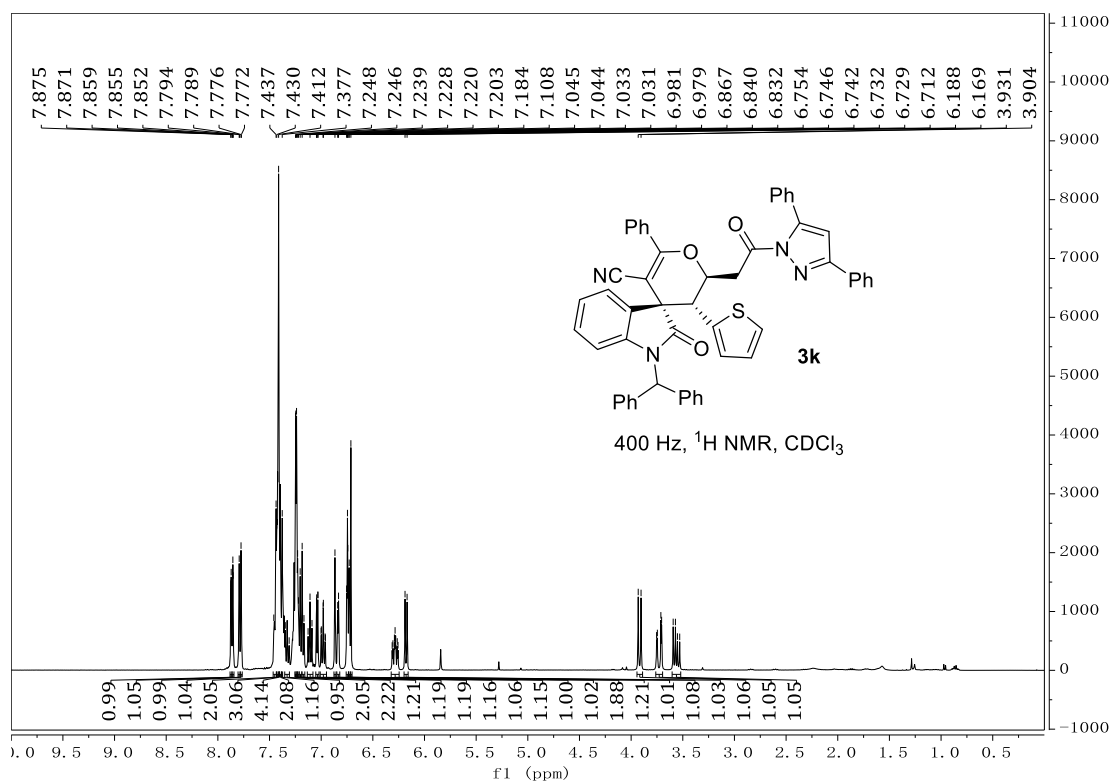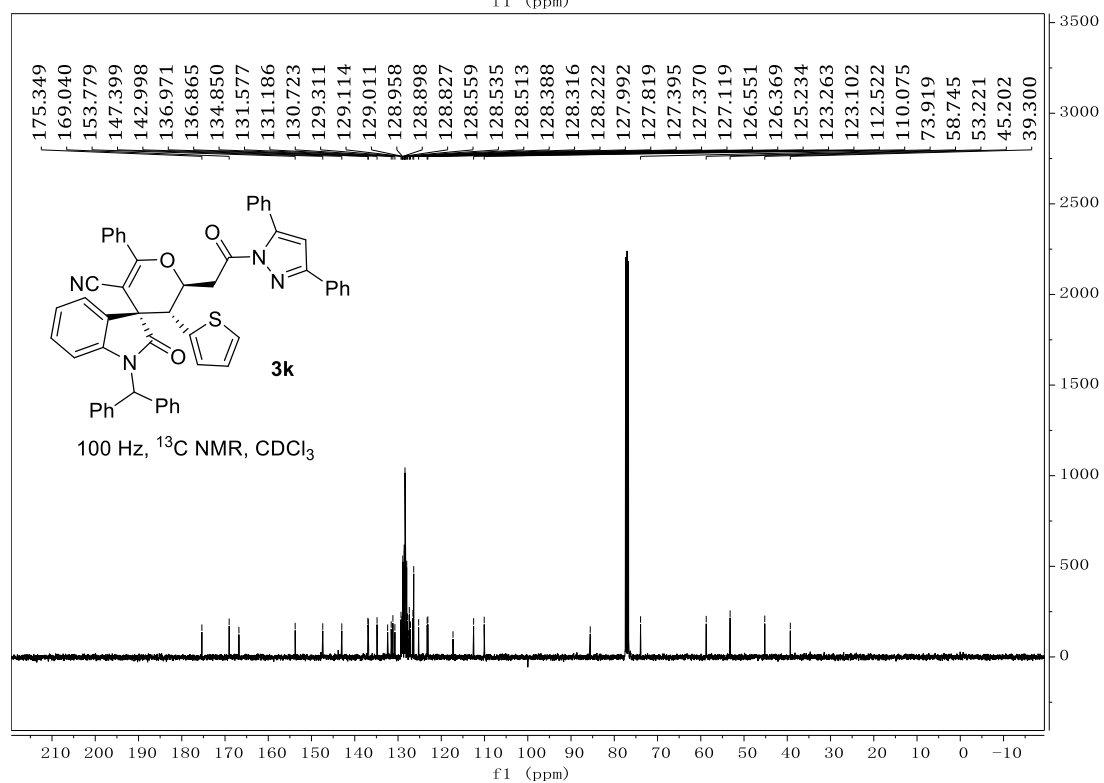

**3k**: (2'S,3R,3'R)-1-benzhydryl-2'-(2-(3,5-diphenyl-1H-pyrazol-1-yl)-2-oxoethyl)-3'-(furan-2-yl)-2-oxo-6'-phenyl-2',3'-dihydrospiro[indoline-3,4'-pyran]-5'-carbonitrile

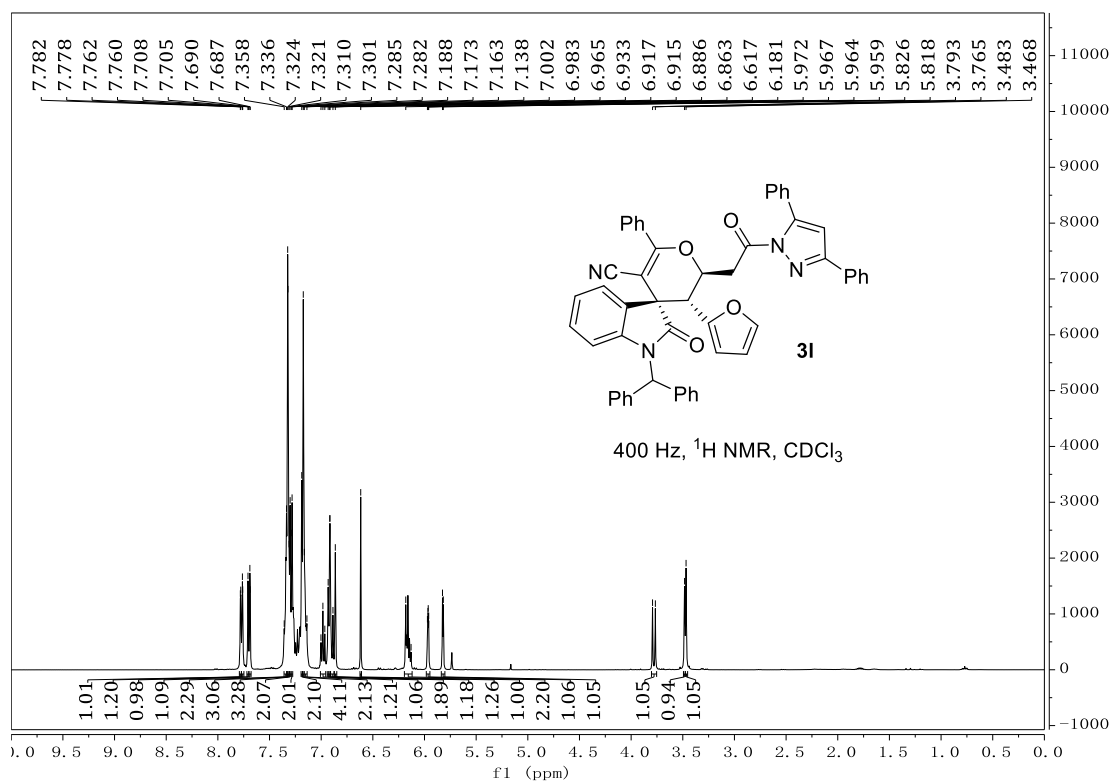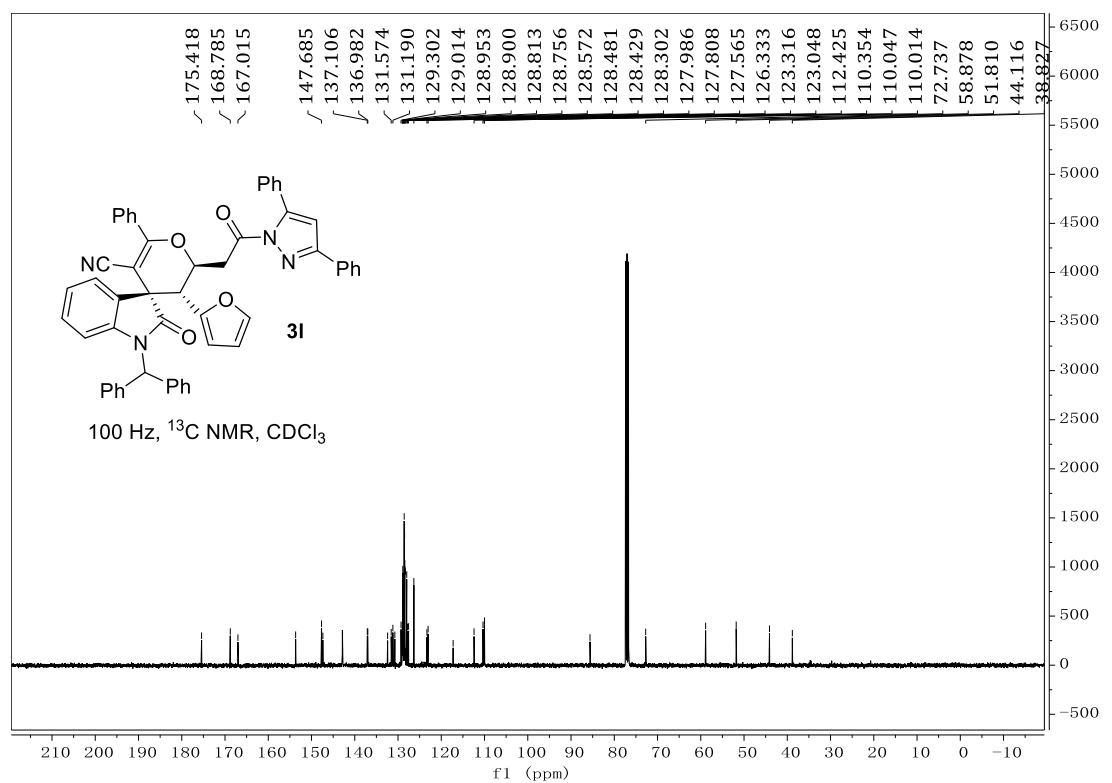

**4a:**(2'S,3R,3'R)-2'-(2-(3,5-diphenyl-1H-pyrazol-1-yl)-2-oxoethyl)-2-oxo-1,3',6'-triphenyl-2',3'-dihydrospiro[indoline-3,4'-pyran]-5'-carbonitrile

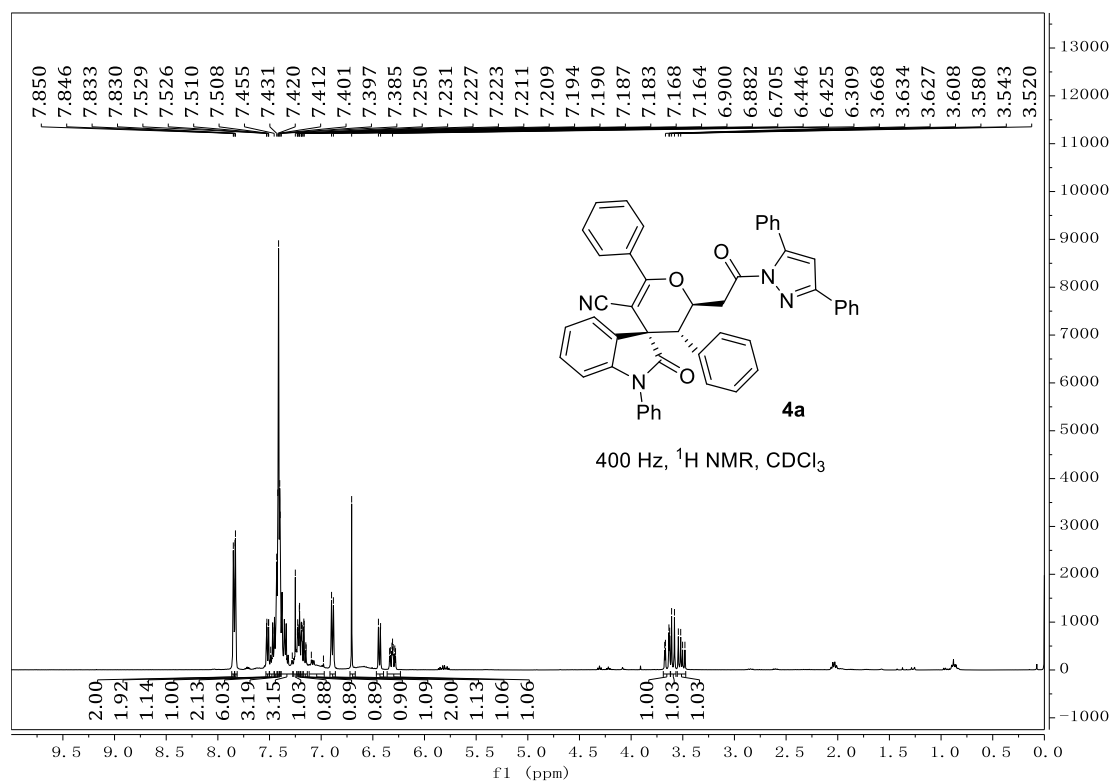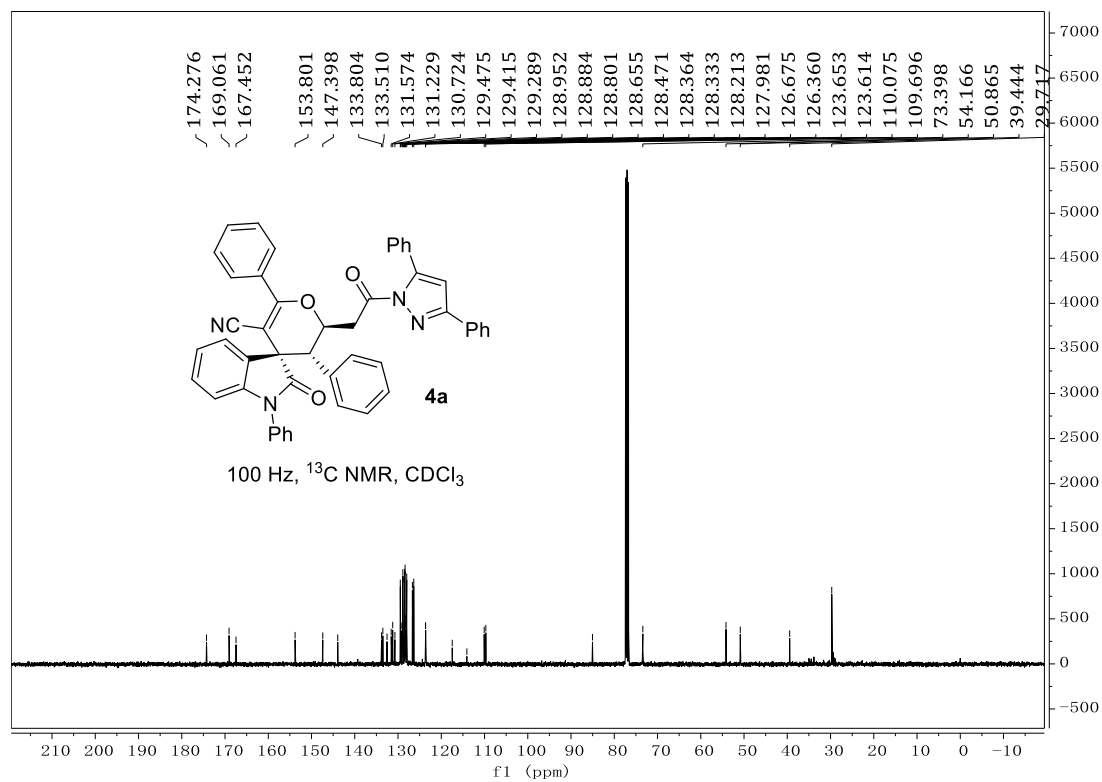

**4b: (2'S,3R,3'R)-2'-(2-(3,5-diphenyl-1H-pyrazol-1-yl)-2-oxoethyl)-1-methyl-2-oxo-3',6'-diphenyl-2',3'-dihydrospiro[indoline-3,4'-pyran]-5'-carbonitrile**

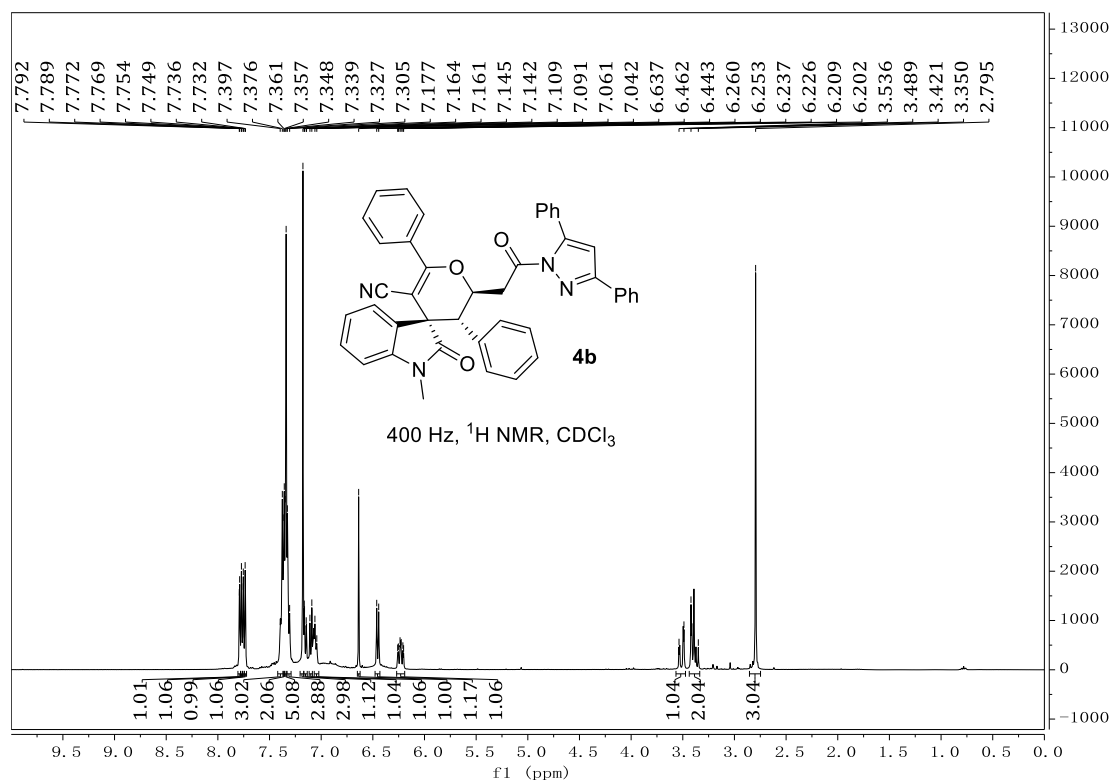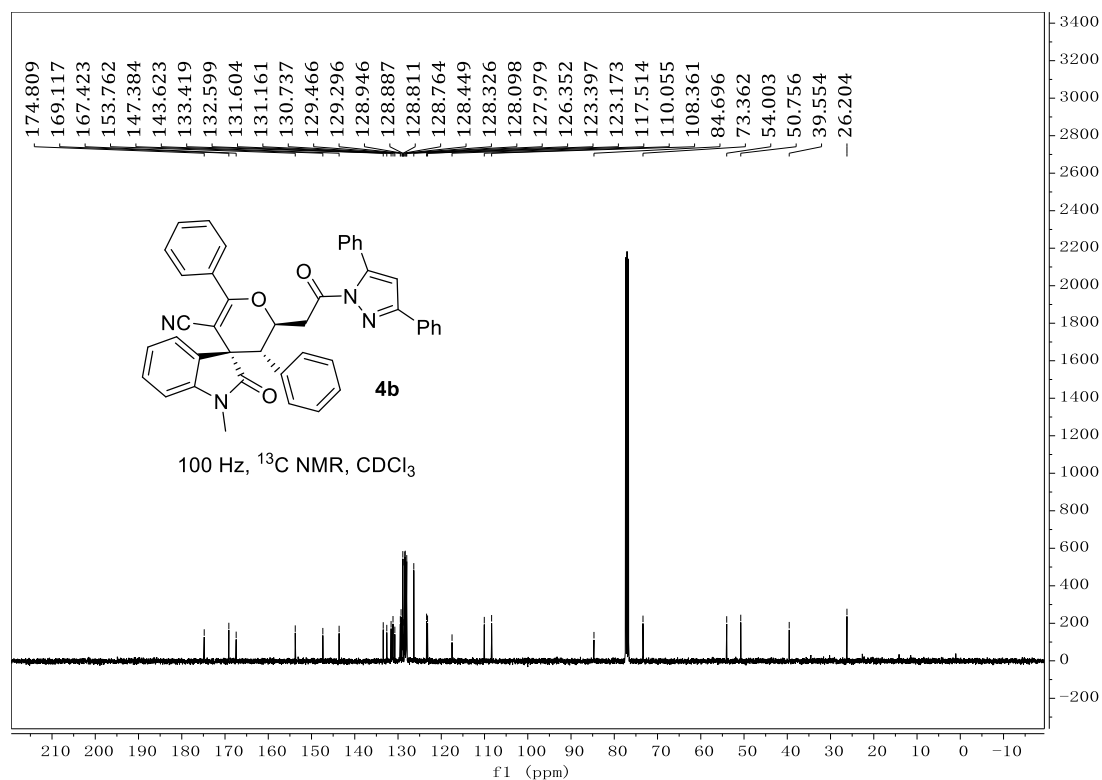

**4c: (2'S,3R,3'R)-1-benzyl-2'-(2-(3,5-diphenyl-1H-pyrazol-1-yl)-2-oxoethyl)-2-oxo-3',6'-diphenyl-2',3'-dihydrospiro[indoline-3,4'-pyran]-5'-carbonitrile**

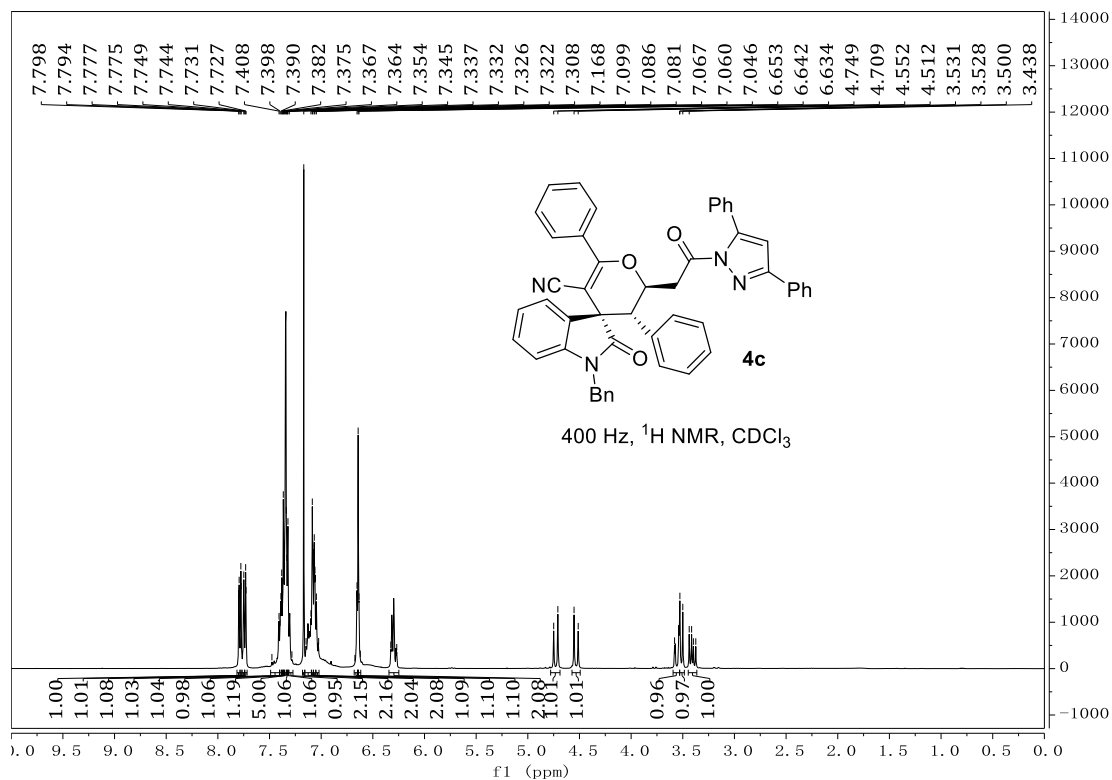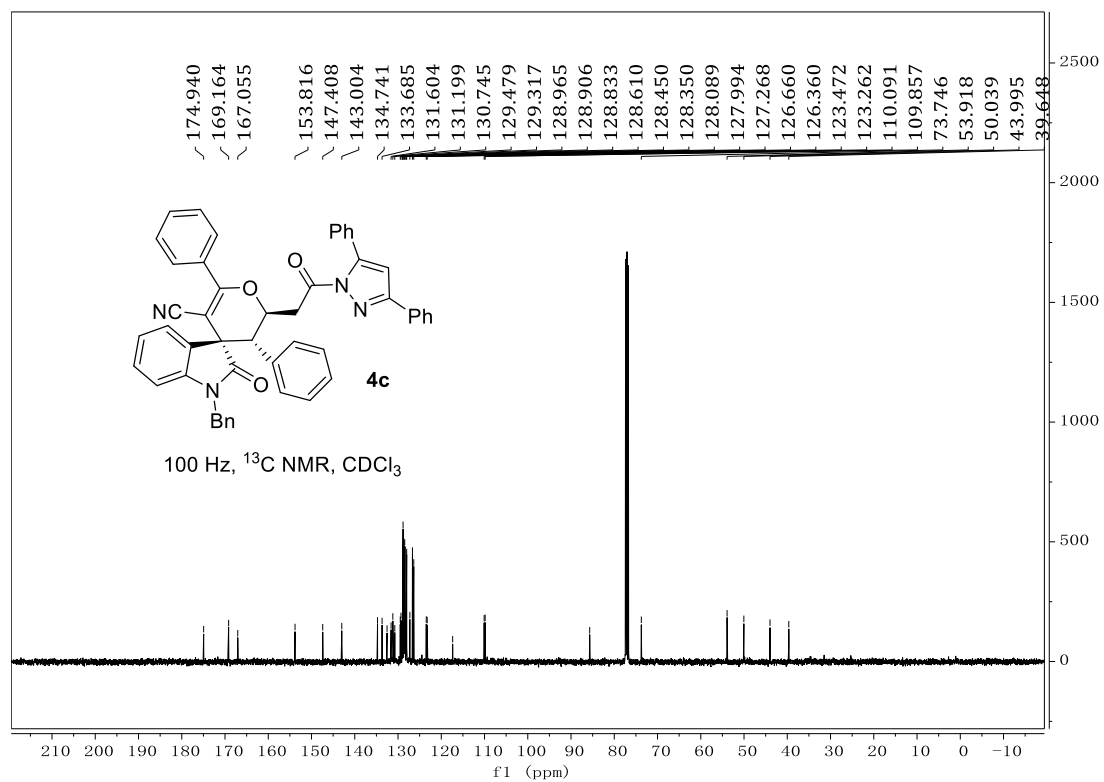

**4d: (2'S,3R,3'R)-1-benzhydryl-2'-(2-(3,5-diphenyl-1H-pyrazol-1-yl)-2-oxoethyl)-5-methyl-2-oxo-3',6'-diphenyl-2',3'-dihydrospiro[indoline-3,4'-pyran]-5'-carbonitrile**

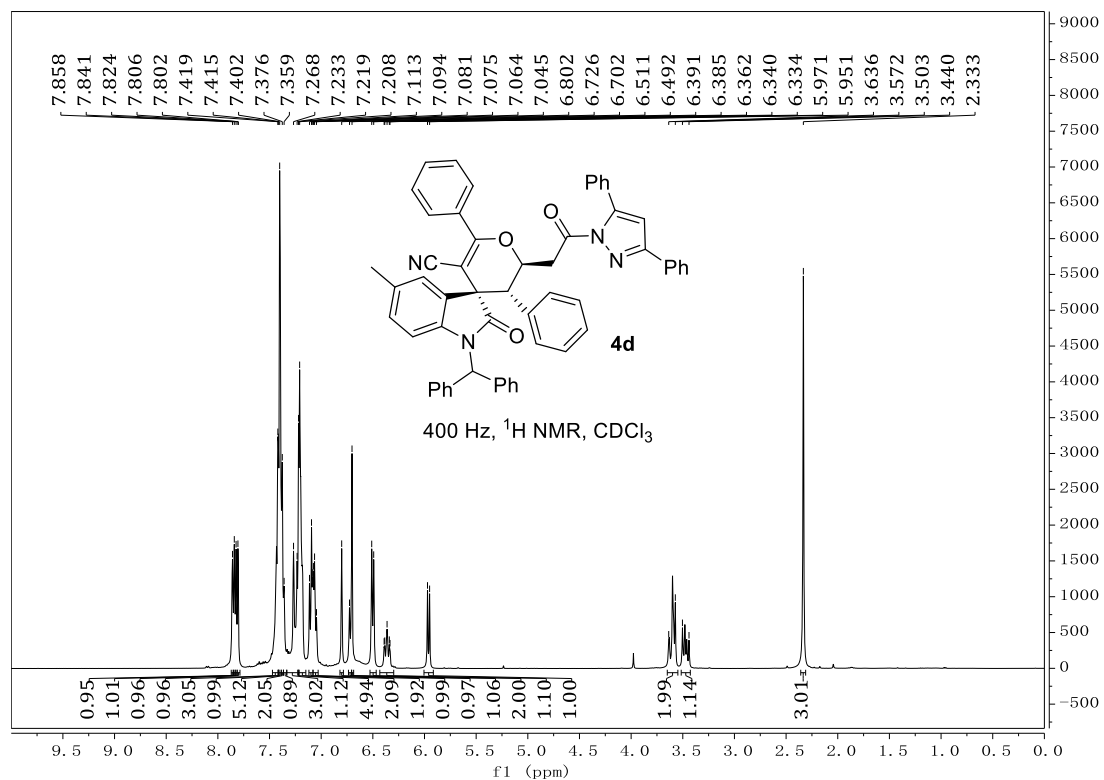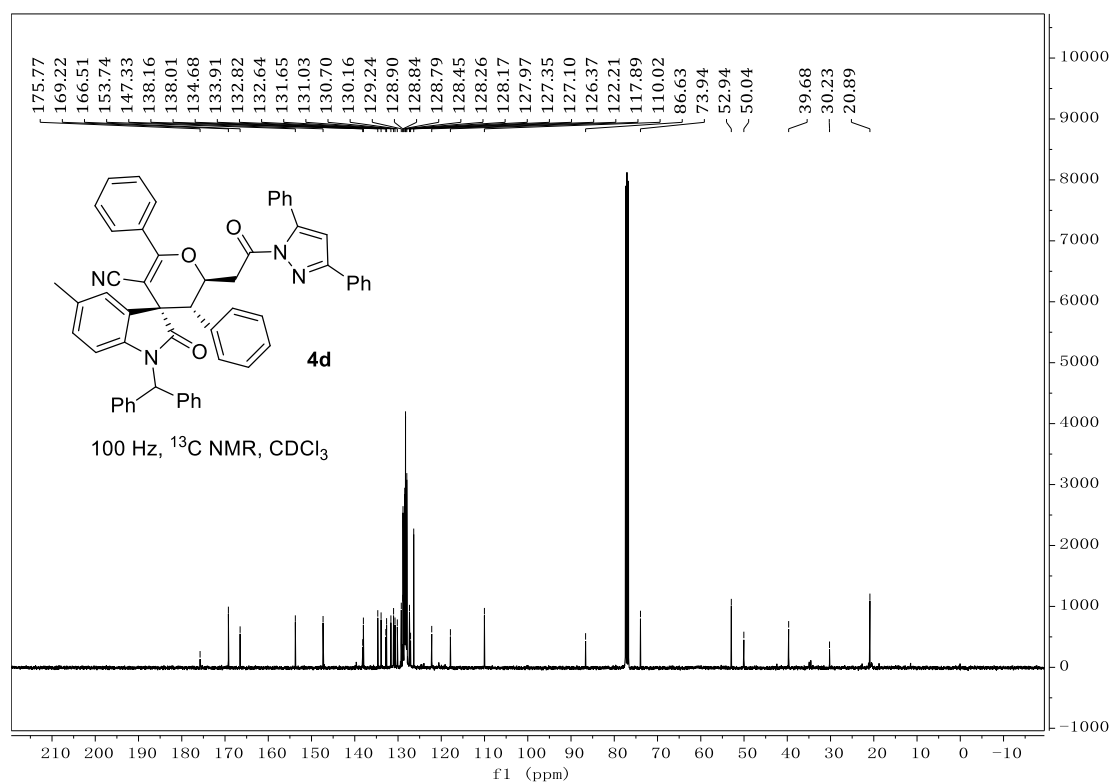

**4e: (2'S,3R,3'R)-1-benzhydryl-5-bromo-2'-(2-(3,5-diphenyl-1H-pyrazol-1-yl)-2-oxoethyl)-2-oxo-3',6'-diphenyl-2',3'-dihydrospiro[indoline-3,4'-pyran]-5'-carbonitrile**

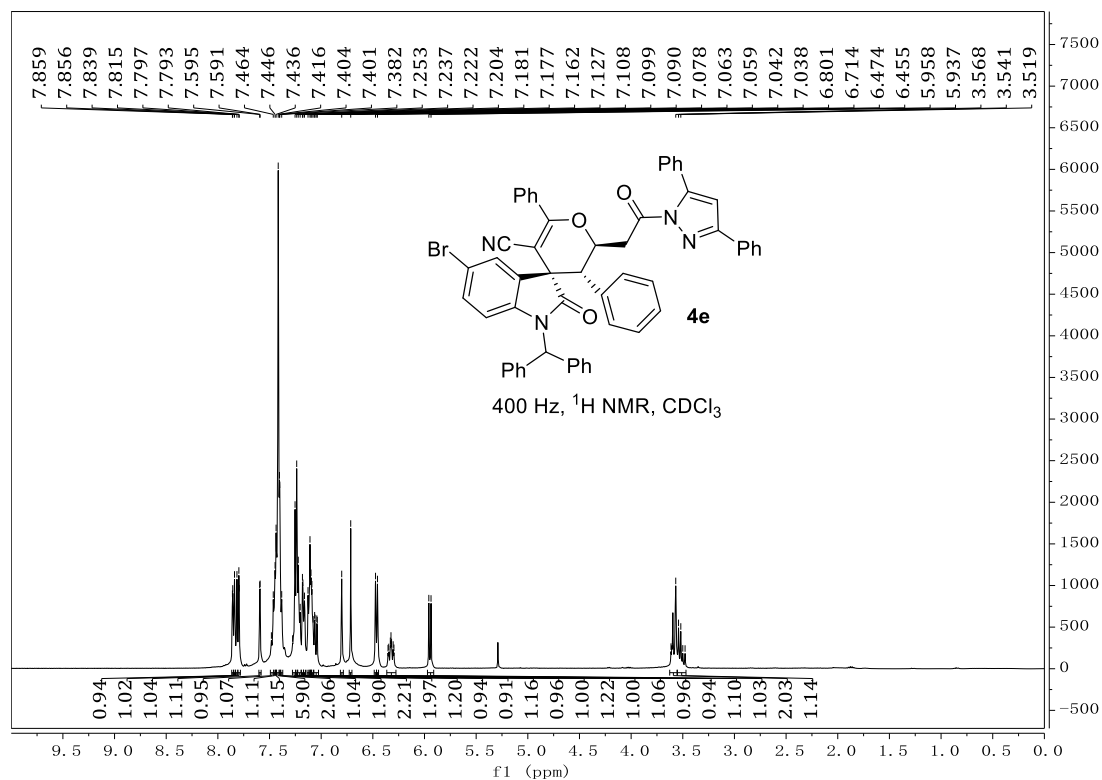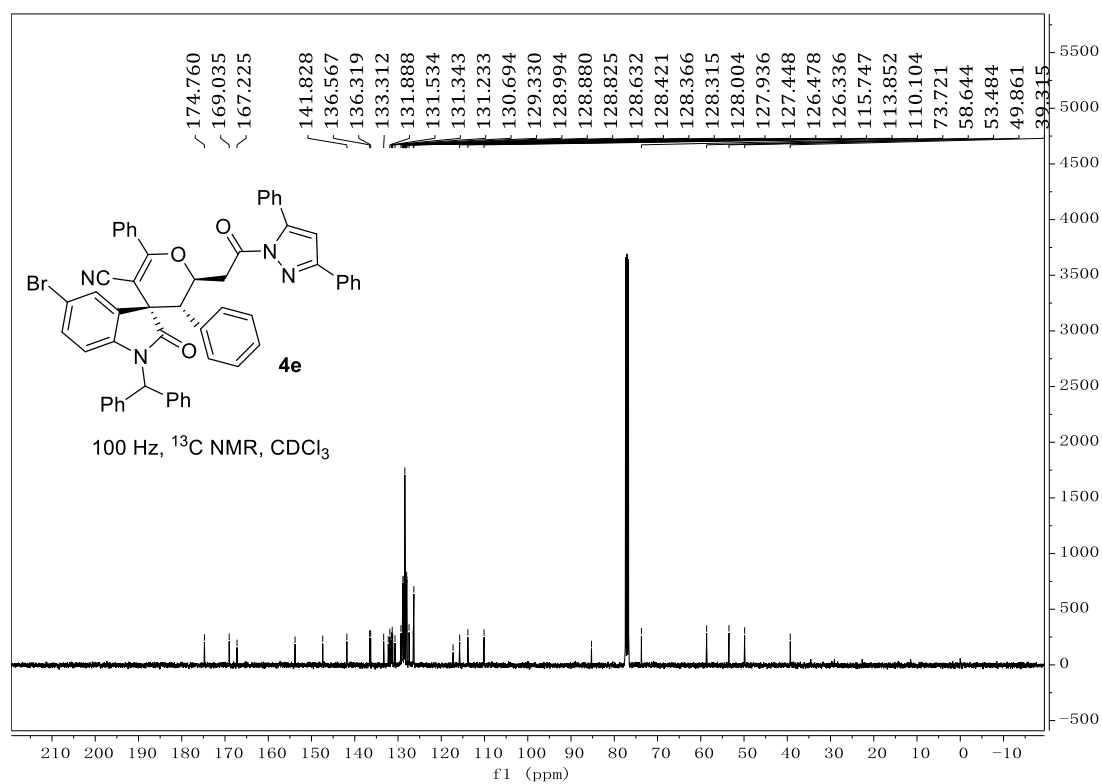

**4f: (2'S,3R,3'R)-1-benzhydryl-7-chloro-2'-(2-(3,5-diphenyl-1H-pyrazol-1-yl)-2-oxoethyl)-2-oxo-3',6'-diphenyl-2',3'-dihydrospiro[indoline-3,4'-pyran]-5'-carbonitrile**

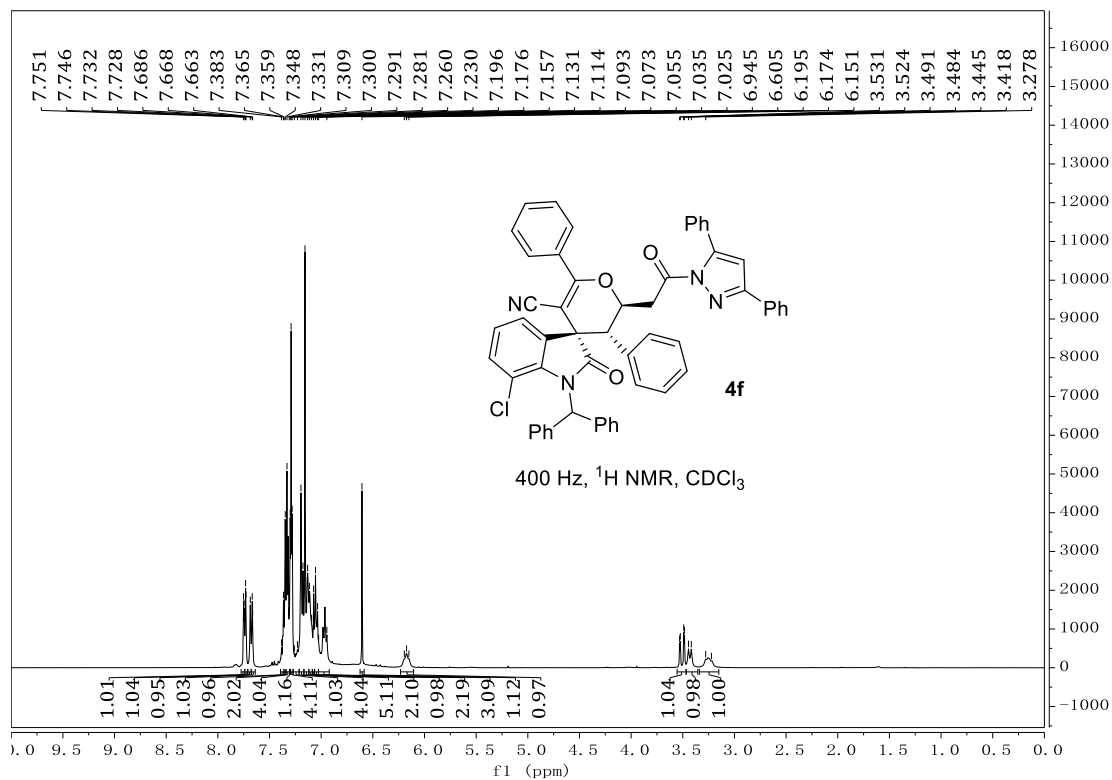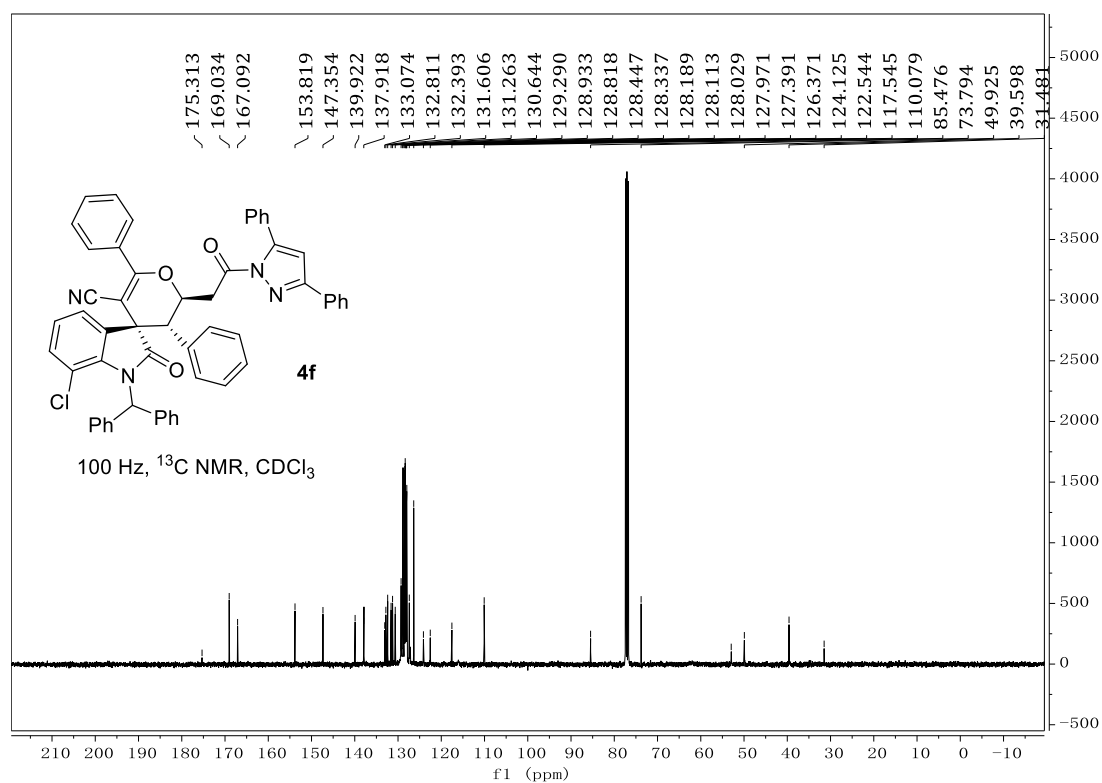



**4g: (2'S,3R,3'R)-1-benzhydryl-2'-(2-(3,5-diphenyl-1H-pyrazol-1-yl)-2-oxoethyl)-5,7-dimethyl-2-oxo-3',6'-diphenyl-2',3'-dihydrospiro[indoline-3,4'-pyran]-5'-carbonitrile**

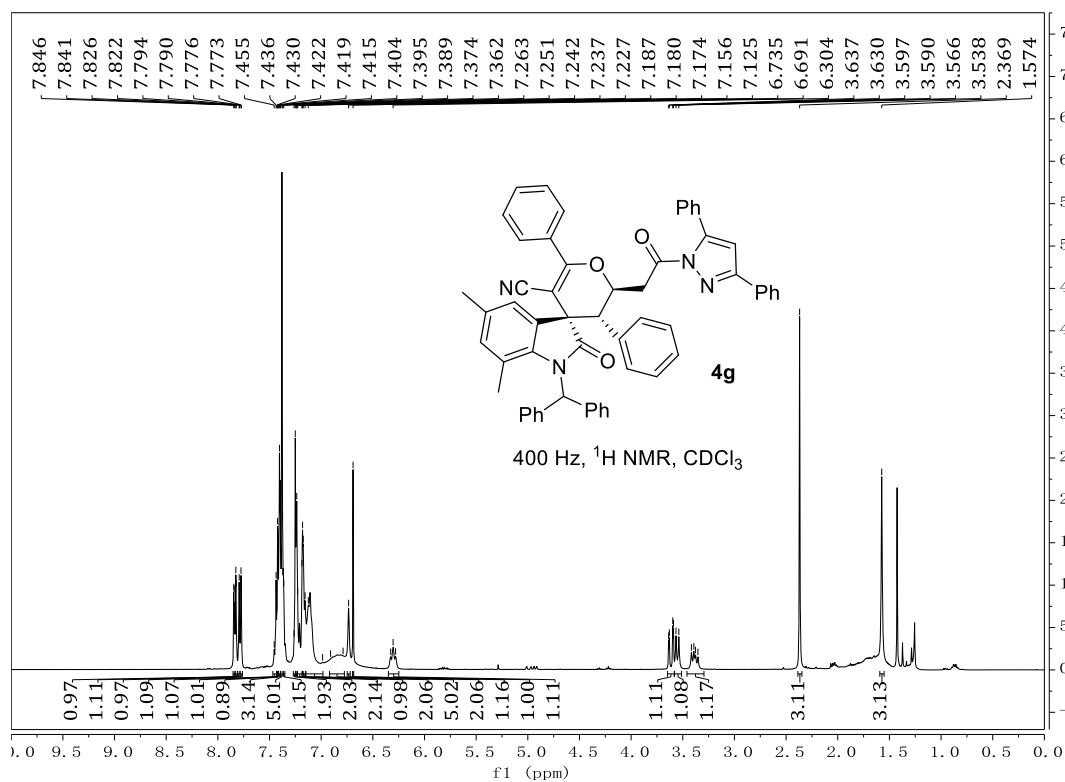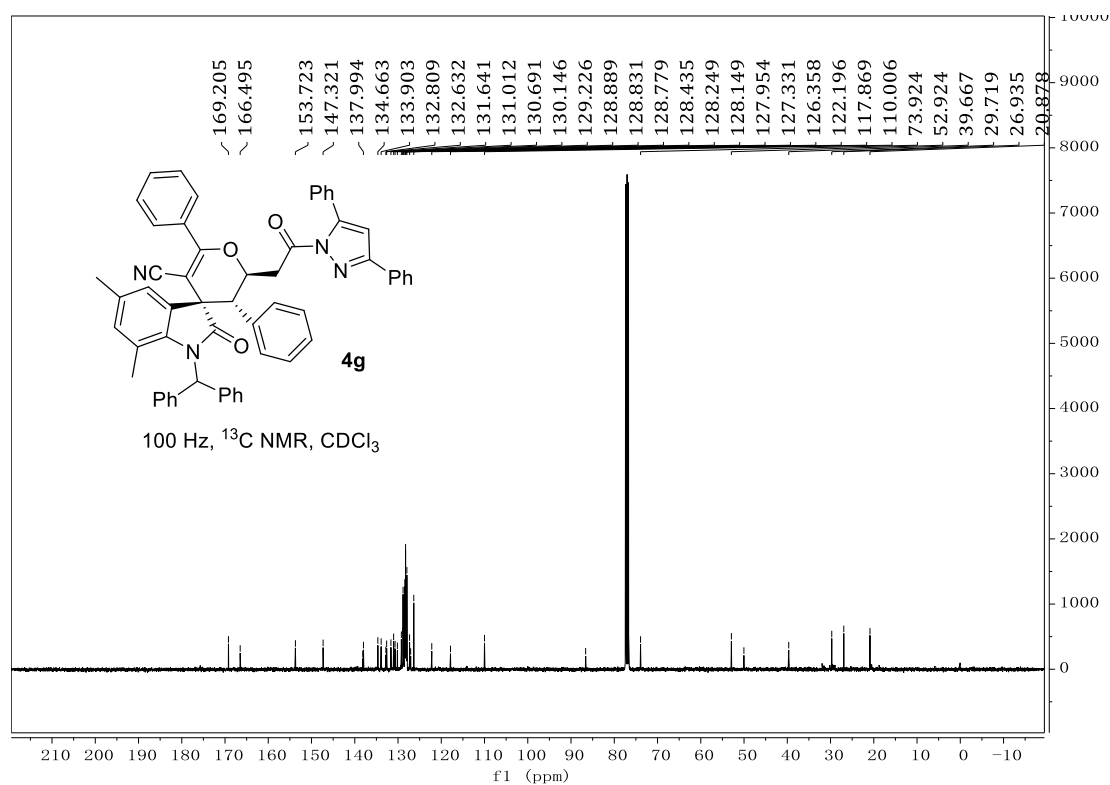

**4h: (2'S,3R,3'R)-1-benzhydryl-2'-(2-(3,5-diphenyl-1H-pyrazol-1-yl)-2-oxoethyl)-6'-(4-fluorophenyl)-2'-oxo-3'-phenyl-2',3'-dihydrospiro[indoline-3,4'-pyran]-5'-carbonitrile**

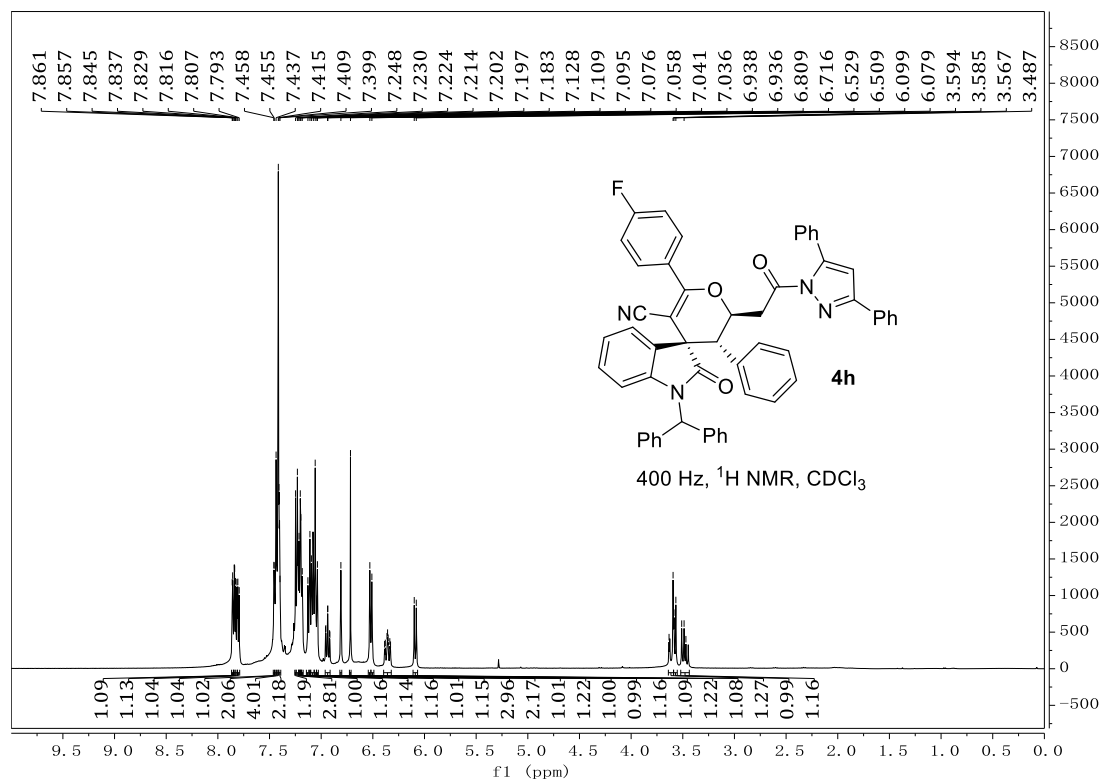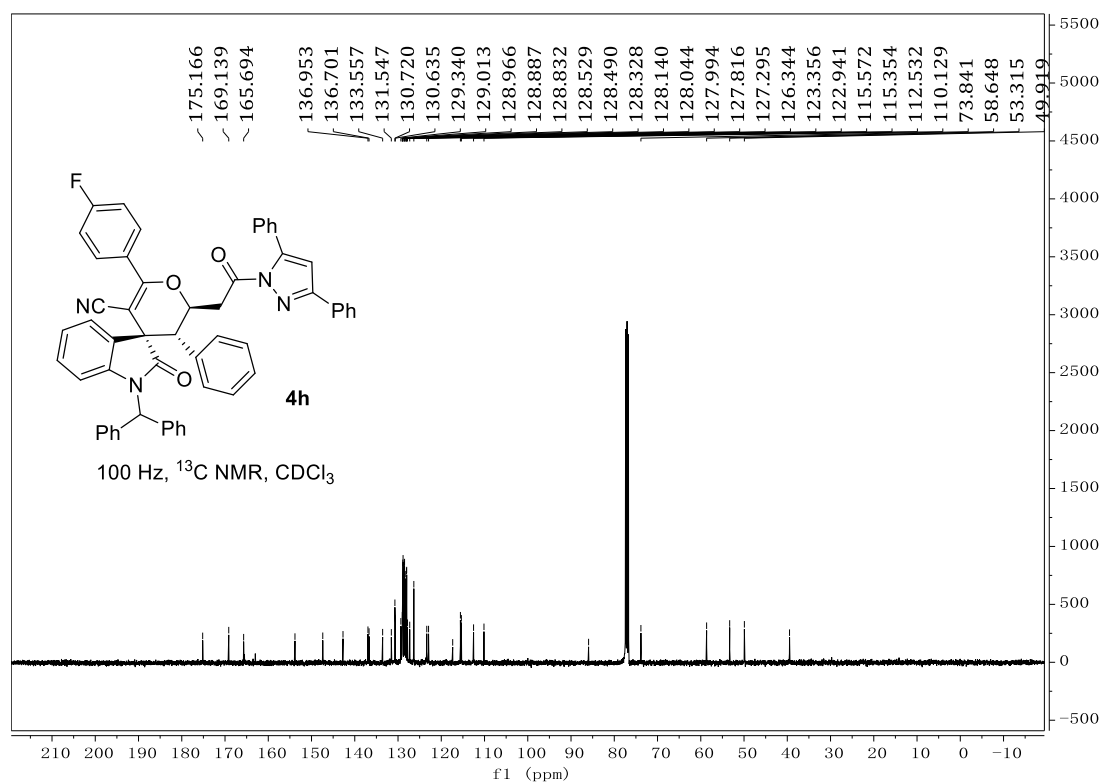

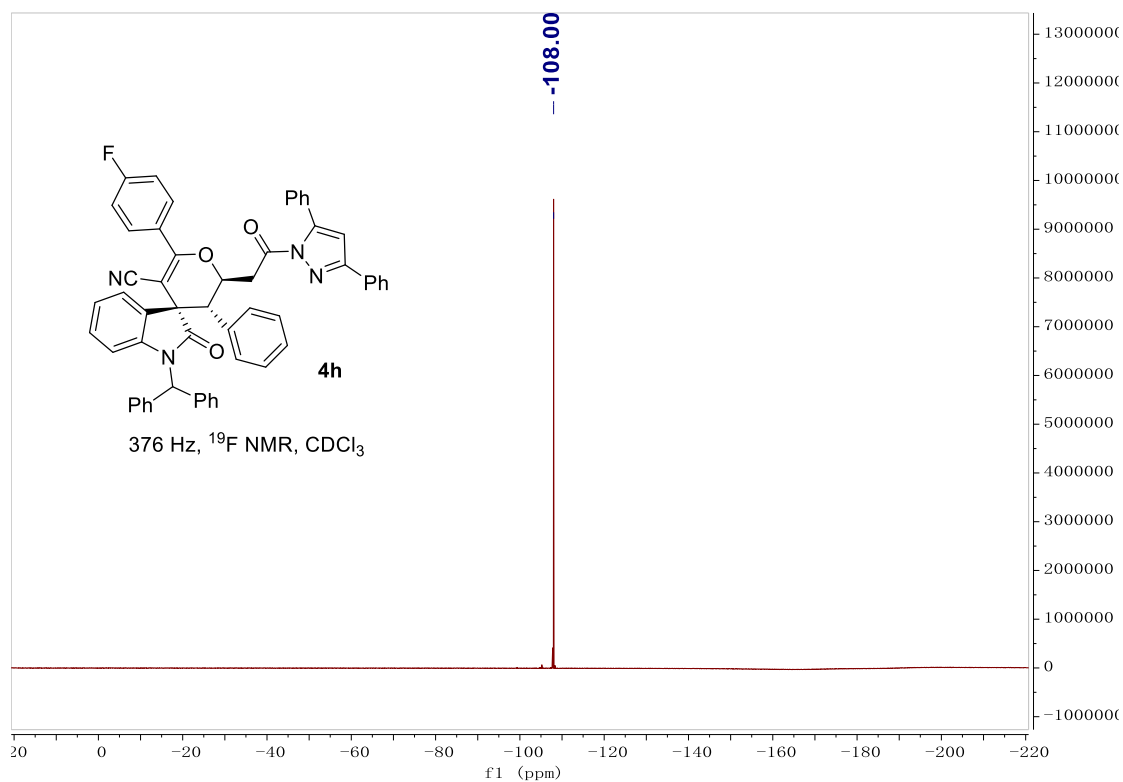

**4i: (2'S,3R,3'R)-1-benzhydryl-6'-(4-chlorophenyl)-2'-(2-(3,5-diphenyl-1H-pyrazol-1-yl)-2-oxoethyl)-2-oxo-3'-phenyl-2',3'-dihydrospiro[indoline-3,4'-pyran]-5'-carbonitrile**

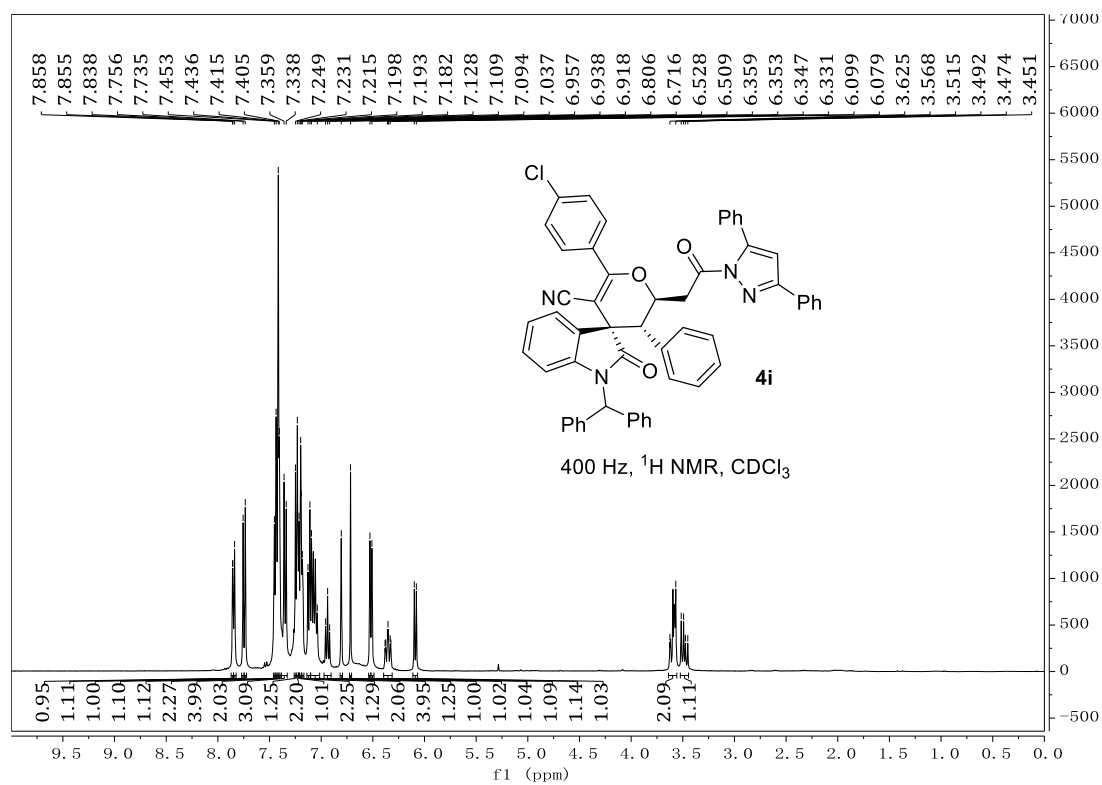

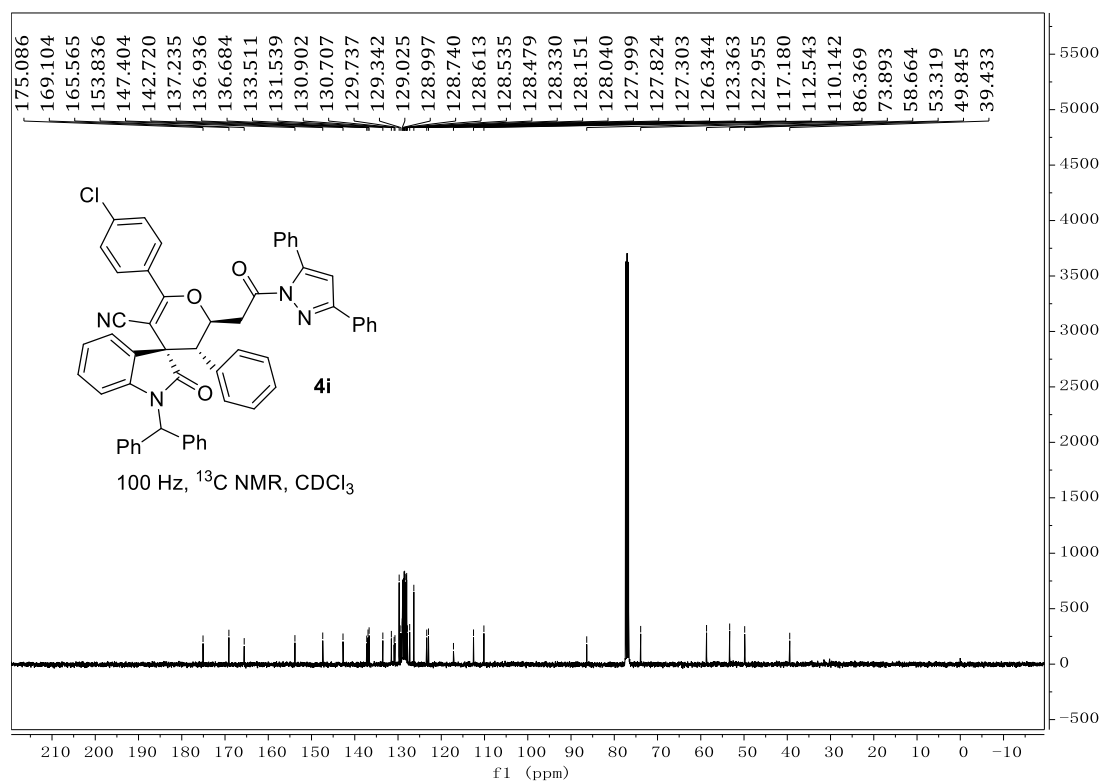

**4j:**(2'S,3R,3'R)-1-benzhydryl-6'-(4-bromophenyl)-2'-(2-(3,5-diphenyl-1H-pyrazol-1-yl)-2-oxoethyl)-2-oxo-3'-phenyl-2',3'-dihydrospiro[indoline-3,4'-pyran]-5'-carbonitrile

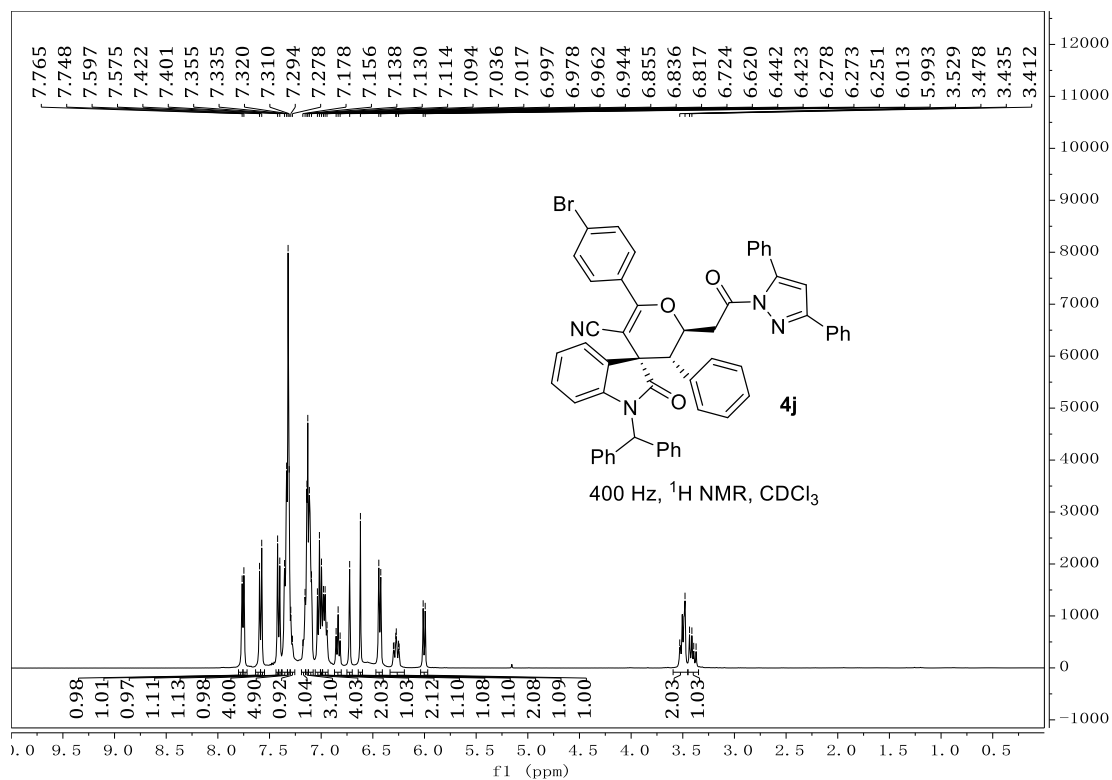

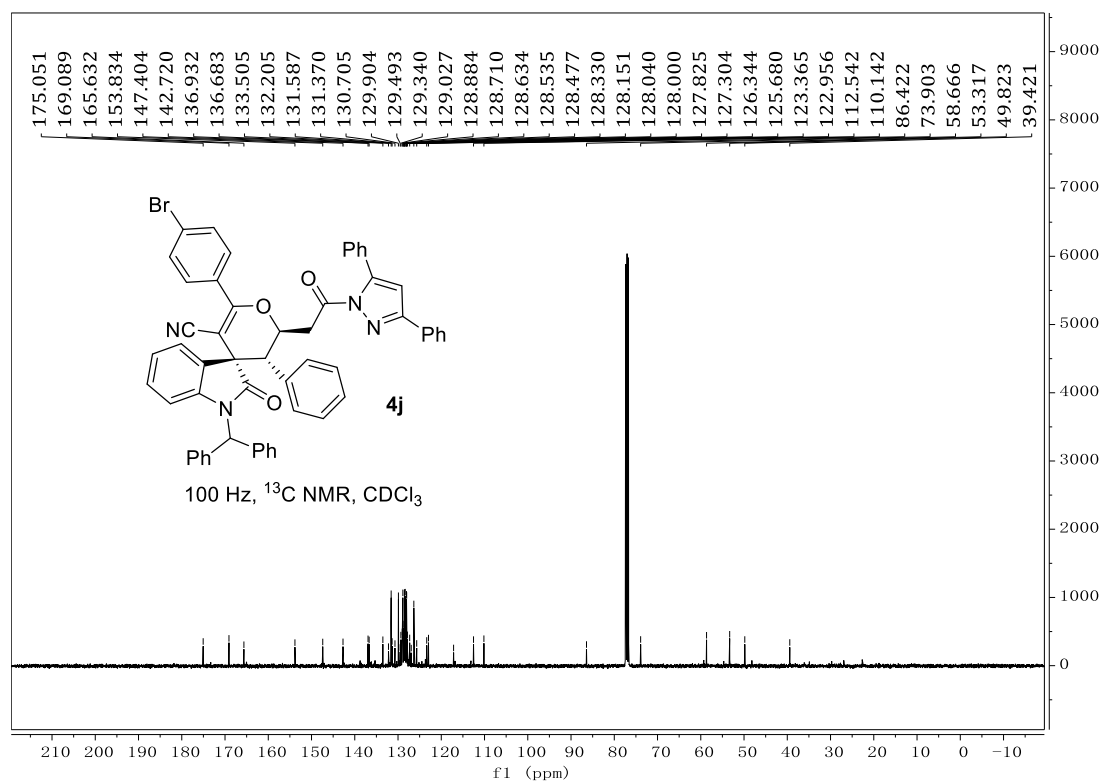

**4k: (2'S,3R,3'R)-1-benzhydryl-2'-(2-(3,5-diphenyl-1H-pyrazol-1-yl)-2-oxoethyl)-6'-(4-methoxyphenyl)-2-oxo-3'-phenyl-2',3'-dihydrospiro[indoline-3,4'-pyran]-5'-carbonitrile**

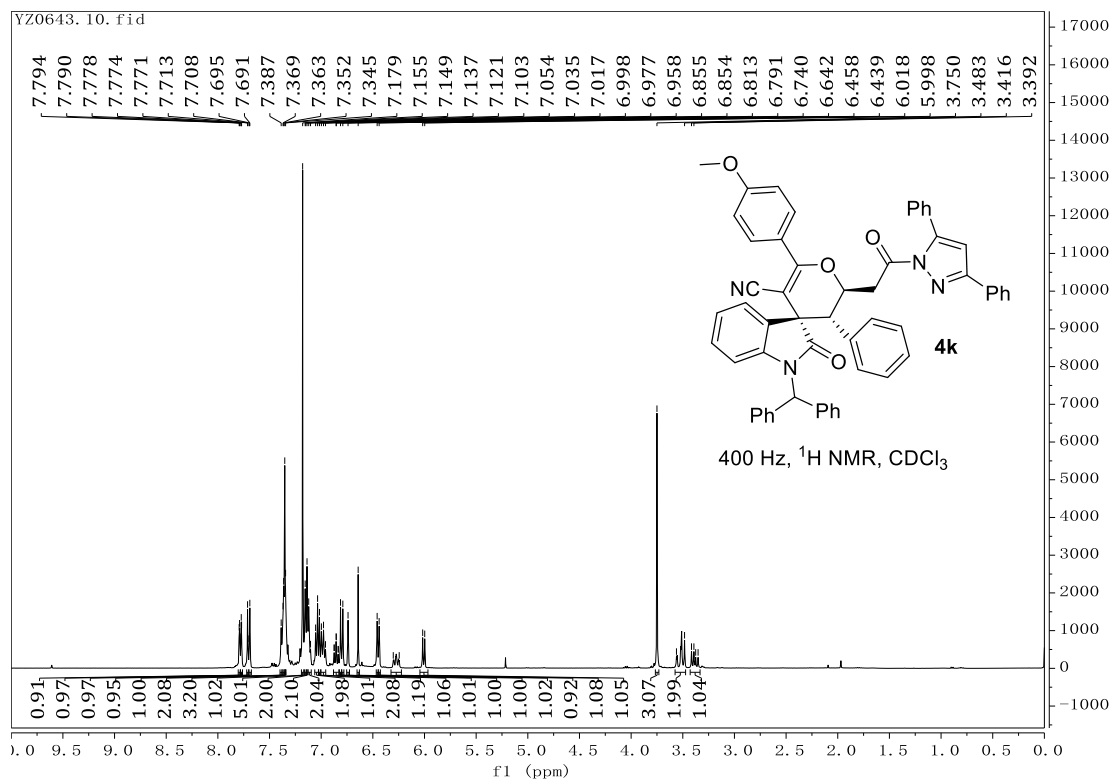

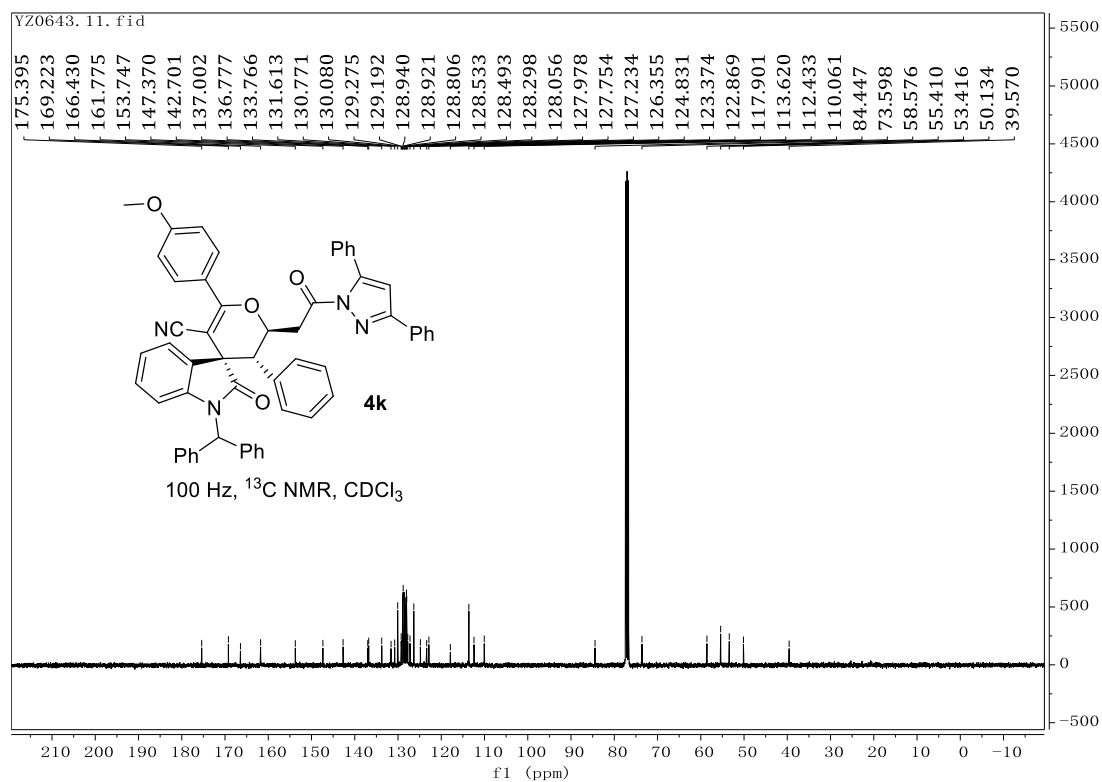

**5:2-((2'S,3R,3'R)-1-benzhydryl-5'-cyano-2-oxo-3',6'-diphenyl-2',3'-dihydrospiro[indoline-3,4'-pyran]-2'-yl)-N-benzylacetamide**

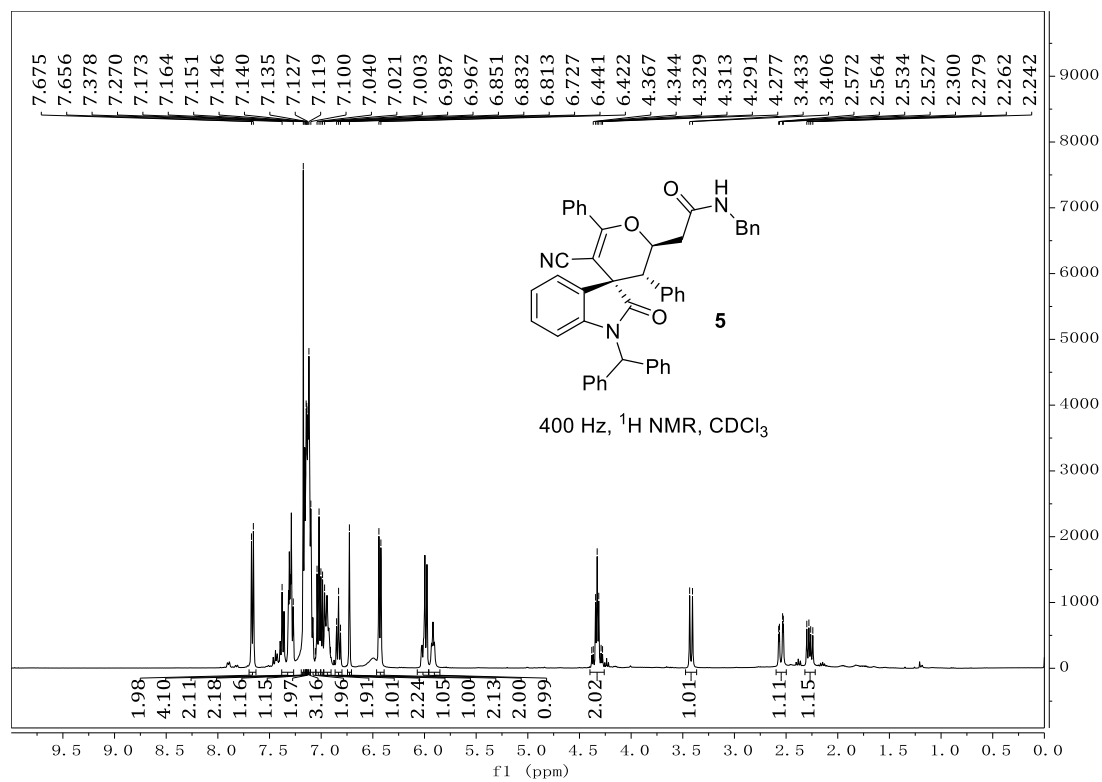

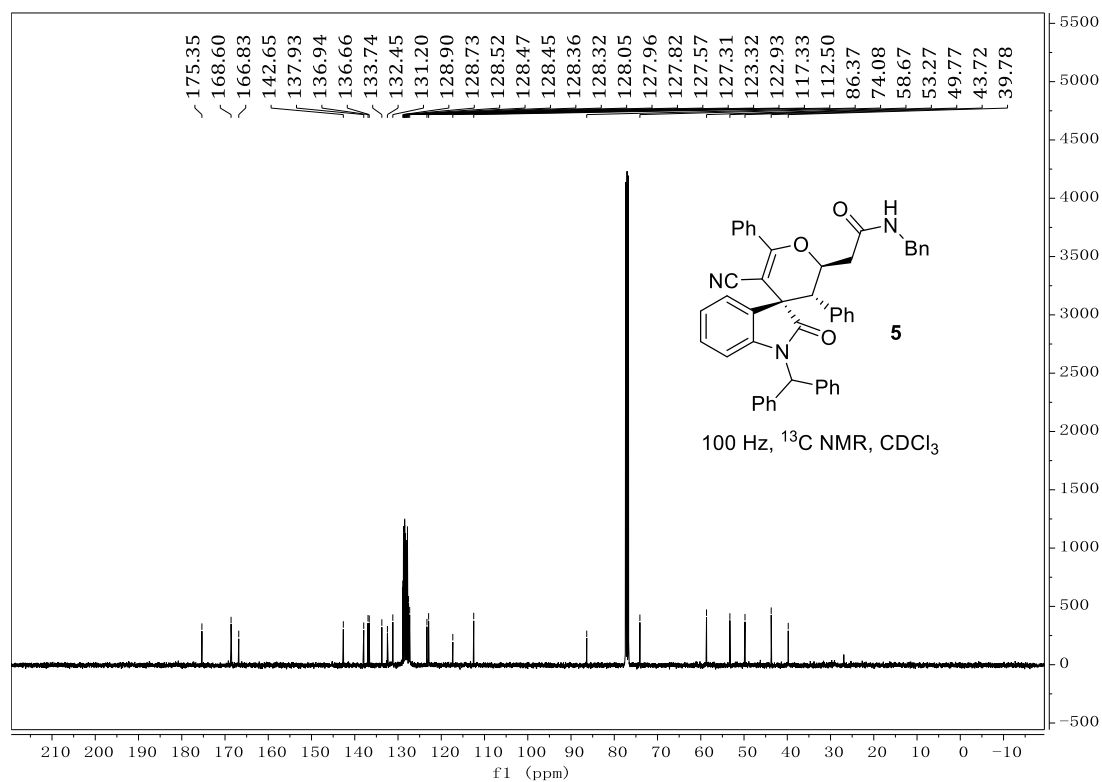

**6: (2'S,3R,3'R)-1-benzhydryl-2'-(2-hydroxyethyl)-2-oxo-3',6'-diphenyl-2',3'-dihydrospiro[indoline-3,4'-pyran]-5'-carbonitrile**

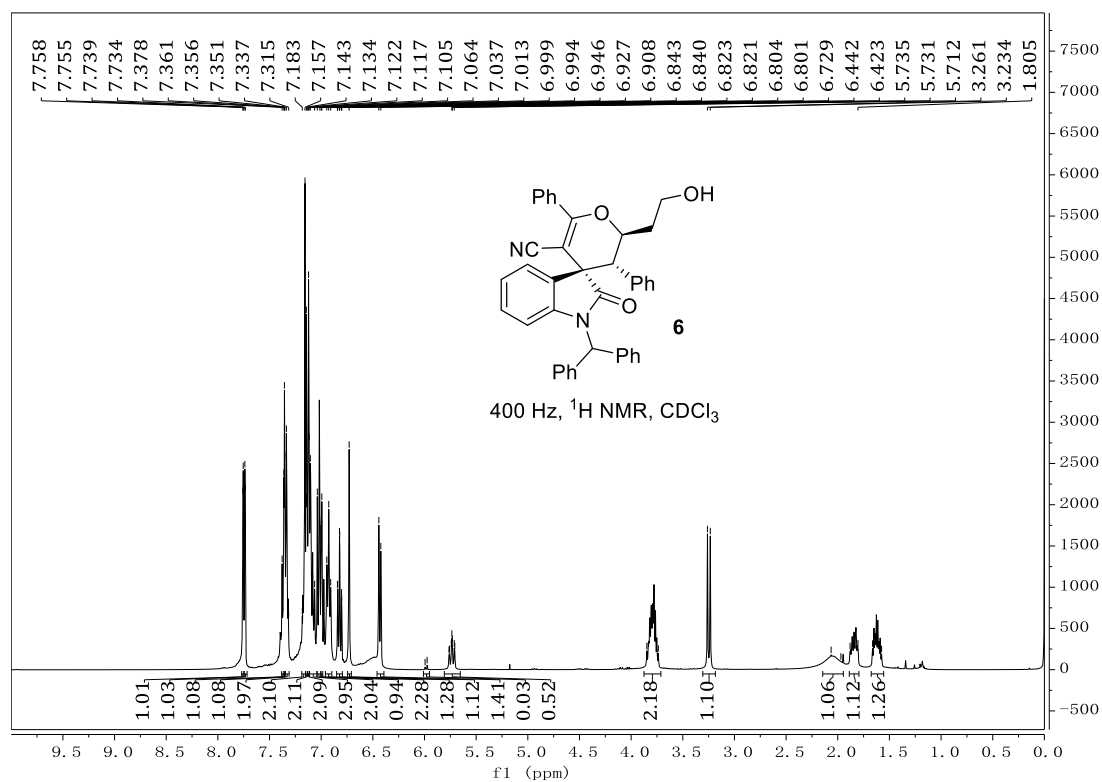

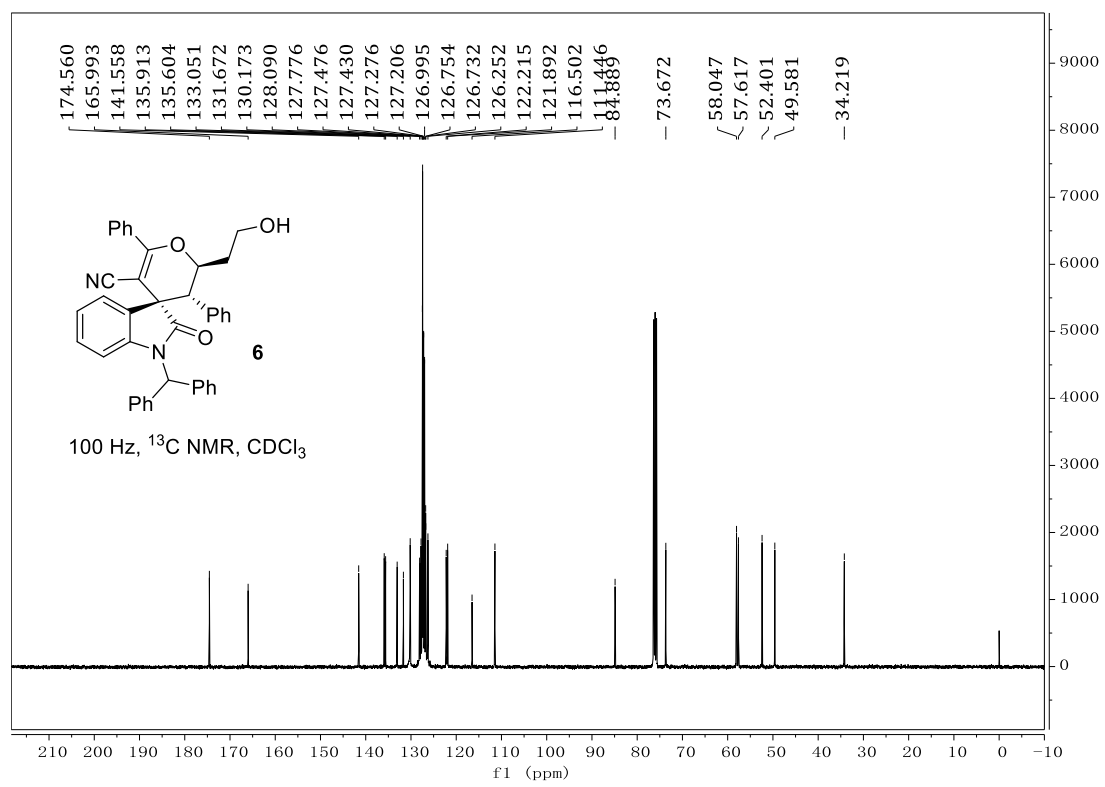



### VIII. HPLC Charts of products

#### 3a-a:(2'S,3R,3'R)-1-benzyl-2'-(2-(3,5-dimethyl-1H-pyrazol-1-yl)-2-oxoethyl)-2-oxo-3',6'-diphenyl-2',3'-dihydrospiro[indoline-3,4'-pyran]-5'-carbonitrile

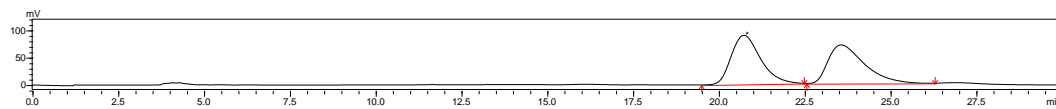

|   | Retention | Area    | High  | Area%  |
|---|-----------|---------|-------|--------|
| 1 | 20.741    | 866053  | 18321 | 12.461 |
| 2 | 23.349    | 5867890 | 87338 | 87.639 |

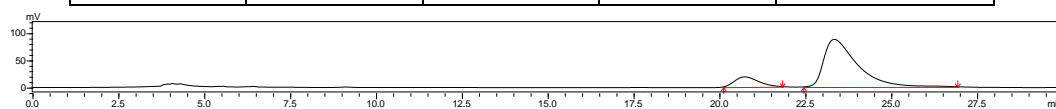

|   | Retention | Area    | High  | Area%  |
|---|-----------|---------|-------|--------|
| 1 | 30.574    | 3716848 | 22837 | 49.315 |
| 2 | 37.706    | 3820166 | 18516 | 50.685 |

**3a: (2'S,3R,3'R)-1-benzhydryl-2'-(2-(3,5-diphenyl-1H-pyrazol-1-yl)-2-oxoethyl)-2-oxo-3',6'-diphenyl-2',3'-dihydrospiro[indoline-3,4'-pyran]-5'-carbonitrile**

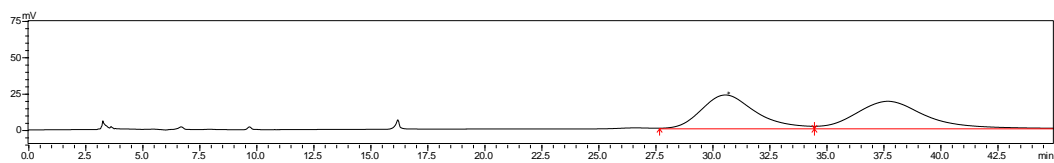

|   | Retention | Area    | High  | Area%  |
|---|-----------|---------|-------|--------|
| 1 | 30.574    | 3716848 | 22837 | 49.315 |
| 2 | 37.706    | 3820166 | 18516 | 50.685 |

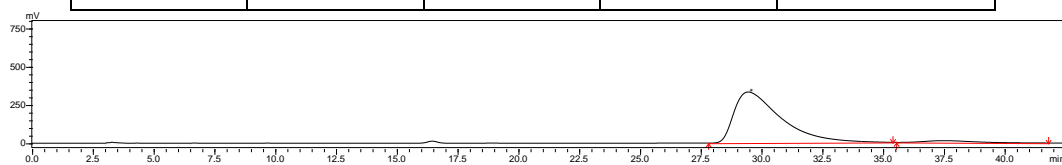

|   | Retention | Area     | High   | Area%  |
|---|-----------|----------|--------|--------|
| 1 | 29.457    | 44566365 | 332898 | 96.449 |
| 2 | 37.508    | 1640995  | 12333  | 3.551  |

**3b:(2'S,3R,3'R)-1-benzhydryl-3'-(3-bromophenyl)-2'-(2-(3,5-diphenyl-1H-pyrazol-1-yl)-2-oxoethyl)-2-oxo-6'-phenyl-2',3'-dihydrospiro[indoline-3,4'-pyran]-5'-carbonitrile**

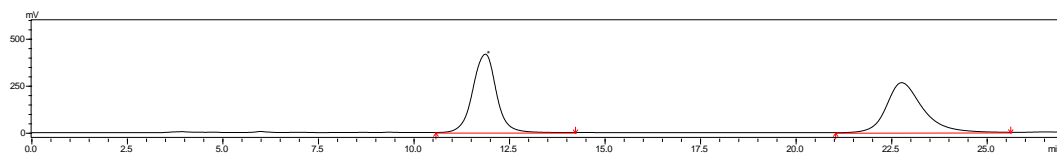

|   | Retention | Area     | High   | Area%  |
|---|-----------|----------|--------|--------|
| 1 | 11.884    | 17905664 | 416885 | 50.568 |
| 2 | 22.780    | 17503526 | 265315 | 49.432 |

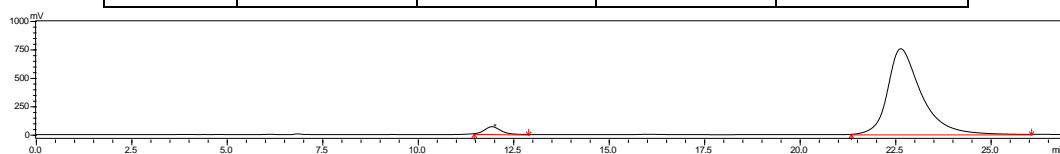

|   | Retention | Area     | High   | Area%  |
|---|-----------|----------|--------|--------|
| 1 | 11.944    | 1811169  | 64081  | 3.791  |
| 2 | 22.649    | 45966931 | 752698 | 96.209 |

**3c:(2'S,3R,3'R)-1-benzhydryl-2'-(2-(3,5-diphenyl-1H-pyrazol-1-yl)-2-oxoethyl)-3'-(3-fluorophenyl)-2-oxo-6'-phenyl-2',3'-dihydrospiro[indoline-3,4'-pyran]-5'-carbonitrile**

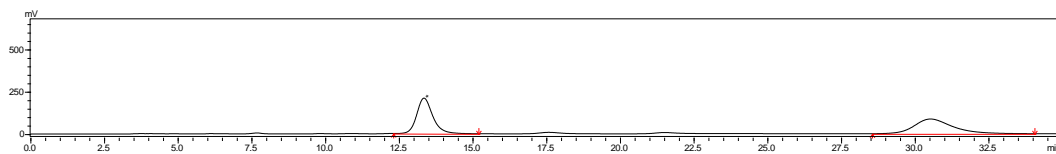

|   | Retention | Area    | High   | Area%  |
|---|-----------|---------|--------|--------|
| 1 | 13.356    | 7878701 | 209452 | 50.012 |
| 2 | 30.536    | 7874885 | 86956  | 49.988 |

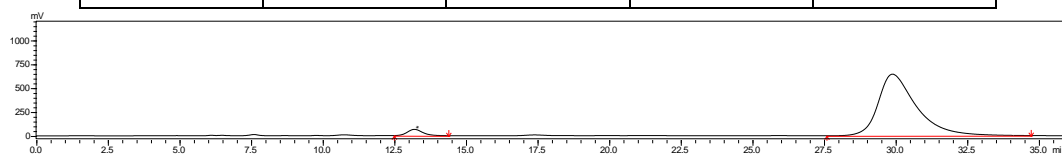

|   | Retention | Area     | High   | Area%  |
|---|-----------|----------|--------|--------|
| 1 | 13.204    | 2442841  | 65702  | 3.923  |
| 2 | 29.894    | 59827147 | 645117 | 96.077 |

**3d:(2'S,3R,3'R)-1-benzhydryl-3'-(3-chlorophenyl)-2'-(2-(3,5-diphenyl-1H-pyrazol-1-yl)-2-oxoethyl)-2-oxo-6'-phenyl-2',3'-dihydrospiro[indoline-3,4'-pyran]-5'-carbonitrile**

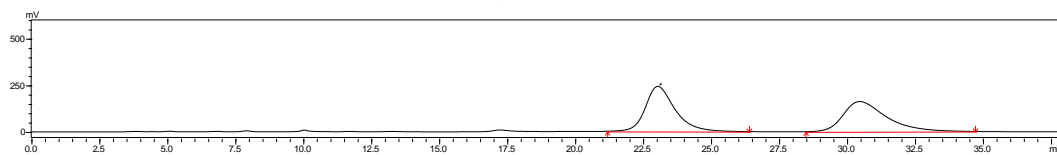

|   | Retention | Area     | High   | Area%  |
|---|-----------|----------|--------|--------|
| 1 | 23.045    | 18324782 | 241784 | 50.621 |
| 2 | 30.472    | 17875244 | 161532 | 49.379 |

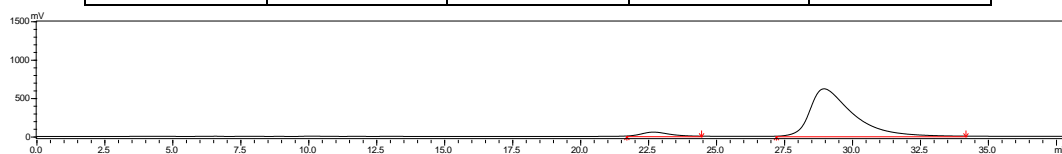

|   | Retention | Area     | High   | Area%  |
|---|-----------|----------|--------|--------|
| 1 | 22.700    | 3484731  | 51510  | 4.957  |
| 2 | 28.976    | 66810541 | 616543 | 95.043 |

**3e:(2'S,3R,3'R)-1-benzhydryl-2'-(2-(3,5-diphenyl-1H-pyrazol-1-yl)-2-oxoethyl)-2-oxo-6'-phenyl-3'-(m-tolyl)-2',3'-dihydrospiro[indoline-3,4'-pyran]-5'-carbonitrile**

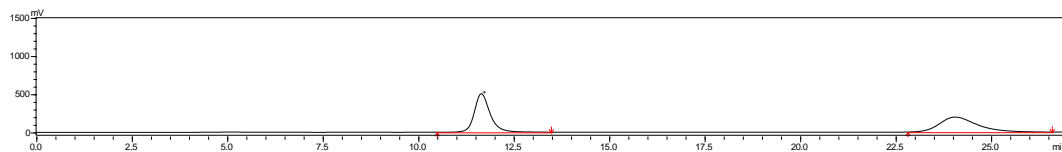

|   | Retention | Area     | High   | Area%  |
|---|-----------|----------|--------|--------|
| 1 | 11.655    | 14486245 | 504436 | 51.764 |
| 2 | 24.062    | 13498876 | 196453 | 48.236 |

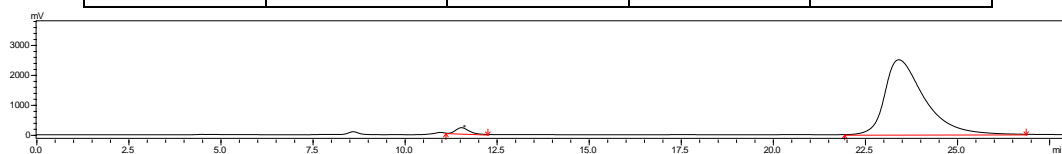

|   | Retention | Area      | High    | Area%  |
|---|-----------|-----------|---------|--------|
| 1 | 11.546    | 4564582   | 196554  | 2.399  |
| 2 | 23.421    | 185673647 | 2495254 | 97.601 |

**3f:(2'S,3R,3'R)-1-benzhydryl-2'-(2-(3,5-diphenyl-1H-pyrazol-1-yl)-2-oxoethyl)-3'-(4-methoxyphenyl)-2-oxo-6'-phenyl-2',3'-dihydrospiro[indoline-3,4'-pyran]-5'-carbonitrile**

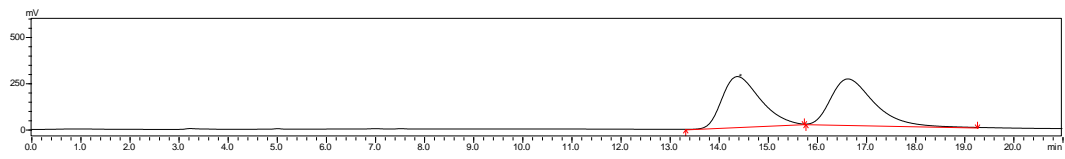

|   | Retention | Area     | High   | Area%  |
|---|-----------|----------|--------|--------|
| 1 | 14.383    | 14607890 | 272964 | 49.399 |
| 2 | 16.632    | 14963226 | 248903 | 50.601 |

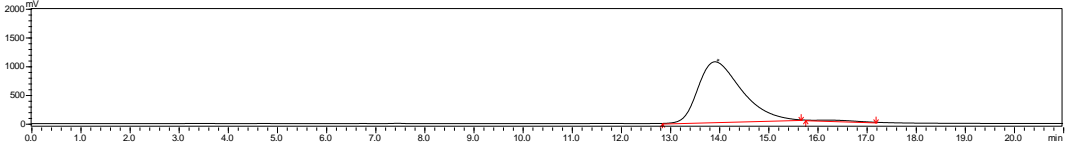

|   | Retention | Area     | High    | Area%  |
|---|-----------|----------|---------|--------|
| 1 | 13.918    | 64046786 | 1048453 | 99.059 |
| 2 | 15.763    | 608537   | 73      | 0.941  |

**3g:(2'S,3R,3'R)-1-benzhydryl-2'-(2-(3,5-diphenyl-1H-pyrazol-1-yl)-2-oxoethyl)-2-oxo-6'-phenyl-3'-(p-tolyl)-2',3'-dihydrospiro[indoline-3,4'-pyran]-5'-carbonitrile**

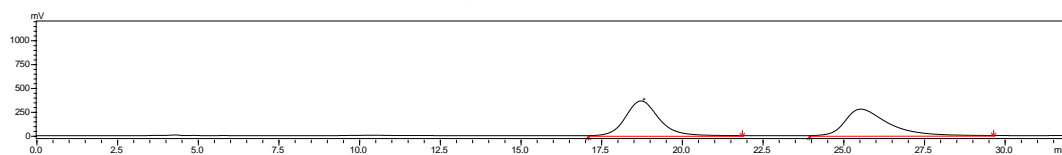

|   | Retention | Area     | High   | Area%  |
|---|-----------|----------|--------|--------|
| 1 | 18.737    | 25888253 | 363846 | 50.478 |
| 2 | 25.542    | 25397453 | 278004 | 49.522 |

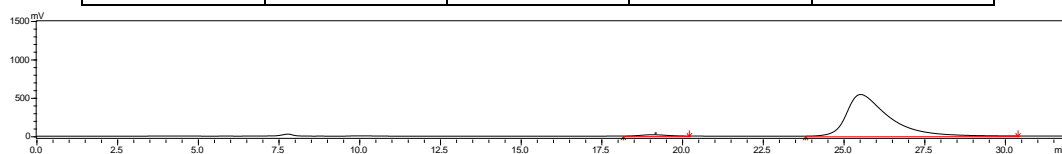

|   | Retention | Area     | High   | Area%  |
|---|-----------|----------|--------|--------|
| 1 | 19.092    | 901280   | 16759  | 1.816  |
| 2 | 25.534    | 48722065 | 541247 | 98.184 |



**3h: (2'S,3R,3'R)-1-benzhydryl-2'-(2-(3,5-diphenyl-1H-pyrazol-1-yl)-2-oxoethyl)-2-oxo-6'-phenyl-3'-(o-tolyl)-2',3'-dihydrospiro[indoline-3,4'-pyran]-5'-carbonitrile**

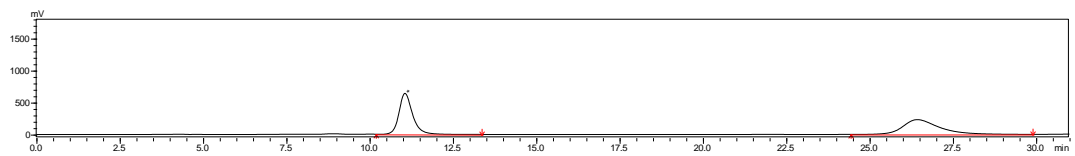

|   | Retention | Area     | High   | Area%  |
|---|-----------|----------|--------|--------|
| 1 | 11.062    | 18063225 | 639513 | 50.641 |
| 2 | 26.439    | 17605640 | 230787 | 49.359 |

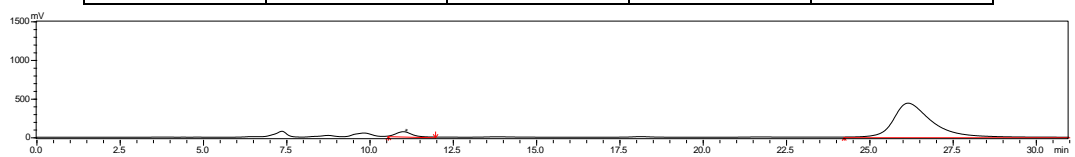

|   | Retention | Area     | High   | Area%  |
|---|-----------|----------|--------|--------|
| 1 | 11.015    | 1836273  | 60458  | 5.063  |
| 2 | 26.167    | 34432186 | 438707 | 94.937 |

**3i:(2'S,3R,3'R)-1-benzhydryl-2'-(2-(3,5-diphenyl-1H-pyrazol-1-yl)-2-oxoethyl)-3'-(2-fluorophenyl)-2-oxo-6'-phenyl-2',3'-dihydrospiro[indoline-3,4'-pyran]-5'-carbonitrile**

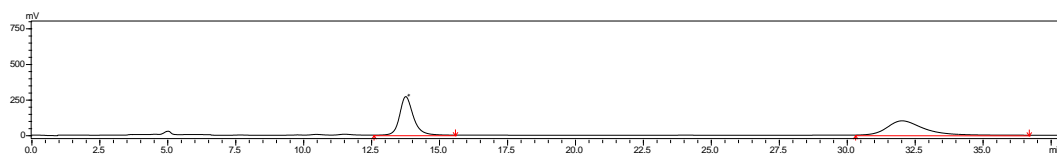

|   | Retention | Area    | High   | Area%  |
|---|-----------|---------|--------|--------|
| 1 | 13.778    | 9436392 | 270296 | 50.584 |
| 2 | 32.041    | 9218539 | 100235 | 49.416 |

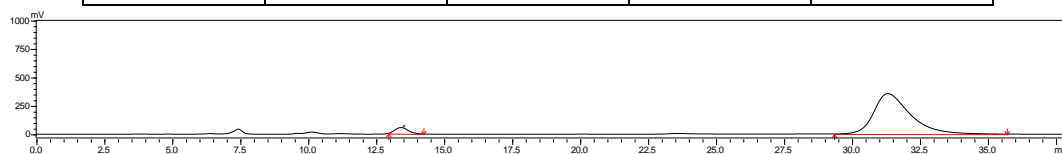

|   | Retention | Area     | High   | Area%  |
|---|-----------|----------|--------|--------|
| 1 | 13.411    | 1761212  | 53152  | 5.067  |
| 2 | 31.323    | 32998287 | 354754 | 94.933 |

**3j:(2'S,3R,3'R)-1-benzhydryl-3'-(3,5-dimethylphenyl)-2'-(2-(3,5-diphenyl-1H-pyrazol-1-yl)-2-oxoethyl)-2-oxo-6'-phenyl-2',3'-dihydrospiro[indoline-3,4'-pyran]-5'-carbonitrile**

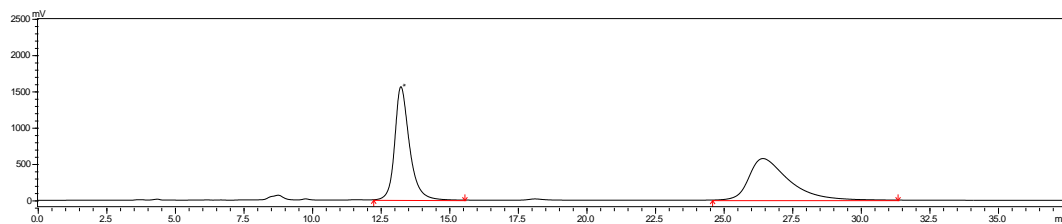

|   | Retention | Area     | High    | Area%  |
|---|-----------|----------|---------|--------|
| 1 | 13.240    | 58102472 | 1559318 | 50.366 |
| 2 | 26.438    | 57257959 | 571594  | 49.634 |

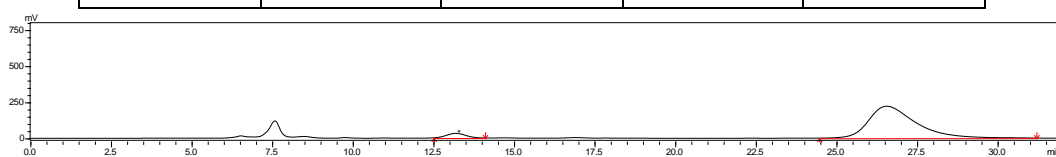

|   | Retention | Area     | High   | Area%  |
|---|-----------|----------|--------|--------|
| 1 | 13.204    | 1301748  | 31545  | 5.491  |
| 2 | 26.562    | 22404168 | 220871 | 94.509 |

**3k: (2'S,3R,3'R)-1-benzhydryl-2'-(2-(3,5-diphenyl-1H-pyrazol-1-yl)-2-oxoethyl)-2-oxo-6'-phenyl-3'-(thiophen-2-yl)-2',3'-dihydrospiro[indoline-3,4'-pyran]-5'-carbonitrile**

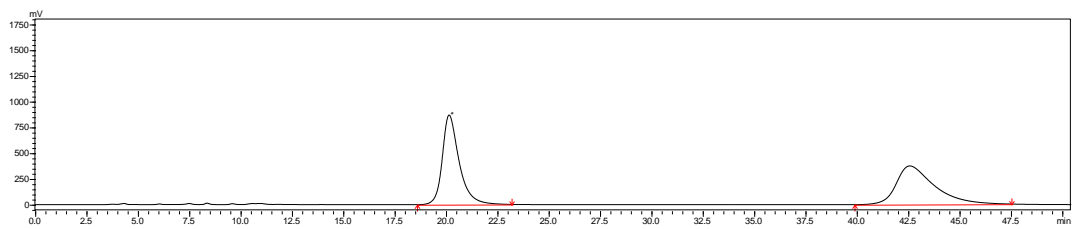

|   | Retention | Area     | High   | Area%  |
|---|-----------|----------|--------|--------|
| 1 | 20.155    | 49493384 | 868445 | 50.659 |
| 2 | 42.583    | 48206086 | 373985 | 49.341 |

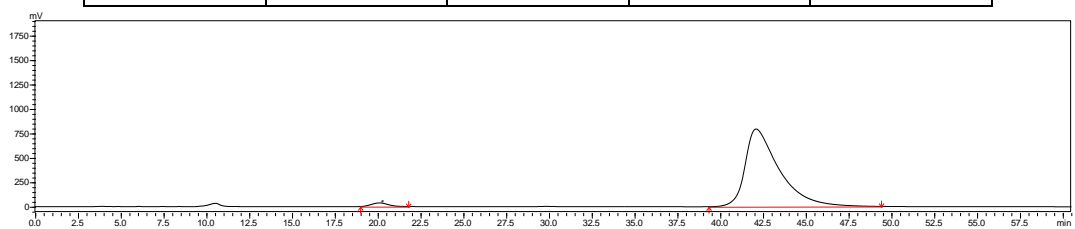

|   | Retention | Area      | High   | Area%  |
|---|-----------|-----------|--------|--------|
| 1 | 20.116    | 2513926   | 36925  | 2.233  |
| 2 | 42.101    | 110059122 | 793441 | 97.767 |

**3l:(2'S,3R,3'R)-1-benzhydryl-2'-(2-(3,5-diphenyl-1H-pyrazol-1-yl)-2-oxoethyl)-3'-(furan-2-yl)-2-oxo-6'-phenyl-2',3'-dihydrospiro[indoline-3,4'-pyran]-5'-carbonitrile**

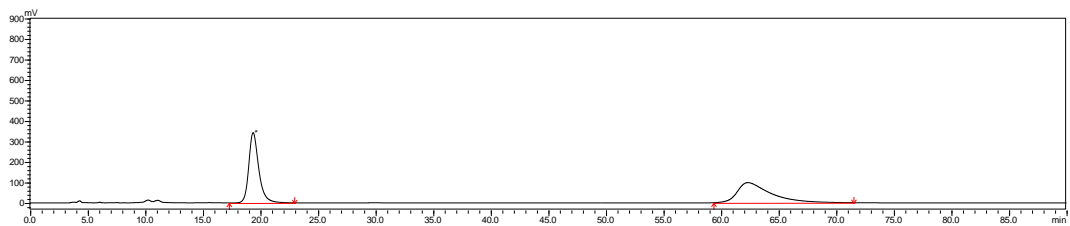

|   | Retention | Area     | High   | Area%  |
|---|-----------|----------|--------|--------|
| 1 | 19.367    | 20586298 | 342704 | 51.135 |
| 2 | 62.339    | 19672588 | 97922  | 48.865 |

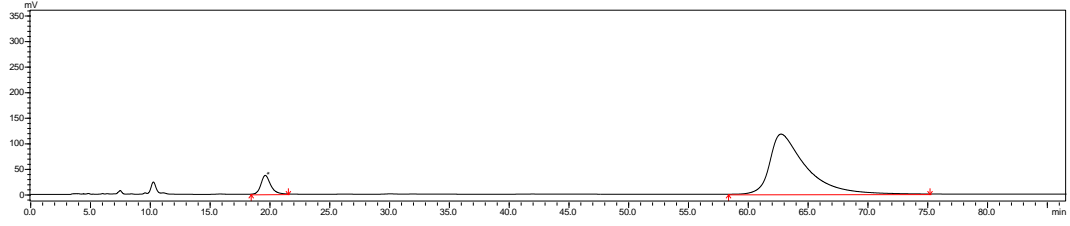

|   | Retention | Area     | High   | Area%  |
|---|-----------|----------|--------|--------|
| 1 | 19.662    | 2043814  | 36709  | 7.691  |
| 2 | 62.790    | 24530109 | 117473 | 92.309 |

**4a:(2'S,3R,3'R)-2'-(2-(3,5-diphenyl-1H-pyrazol-1-yl)-2-oxoethyl)-2-oxo-1,3,6'-triphenyl-2',3'-dihydrospiro[indoline-3,4'-pyran]-5'-carbonitrile**

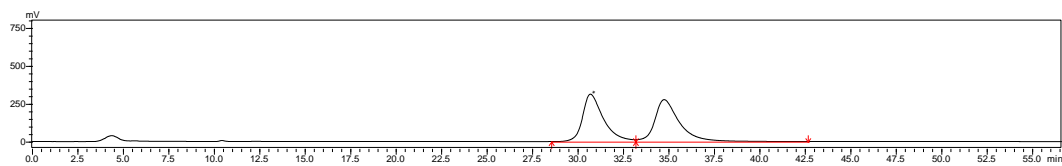

|   | Retention | Area     | High   | Area%  |
|---|-----------|----------|--------|--------|
| 1 | 30.718    | 24925969 | 312388 | 49.058 |
| 2 | 34.771    | 25883104 | 276427 | 50.942 |

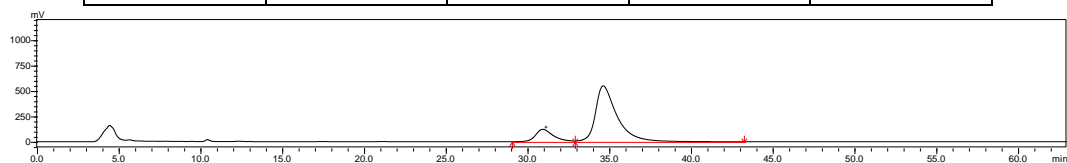

|   | Retention | Area     | High   | Area%  |
|---|-----------|----------|--------|--------|
| 1 | 30.940    | 9328310  | 122380 | 15.588 |
| 2 | 34.639    | 50514612 | 549528 | 84.412 |

**4b: (2'S,3R,3'R)-2'-(2-(3,5-diphenyl-1H-pyrazol-1-yl)-2-oxoethyl)-1-methyl-2-oxo-3',6'-diphenyl-2',3'-dihydrospiro[indoline-3,4'-pyran]-5'-carbonitrile**

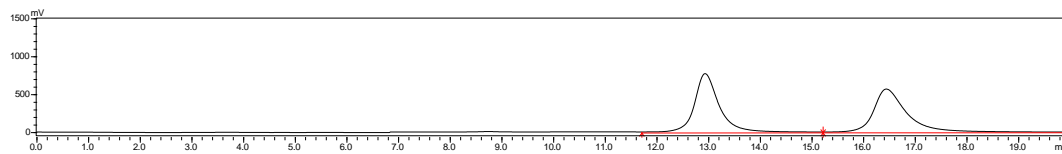

|   | Retention | Area     | High   | Area%  |
|---|-----------|----------|--------|--------|
| 1 | 12.942    | 26155028 | 774178 | 50.616 |
| 2 | 16.451    | 25518525 | 569088 | 49.384 |

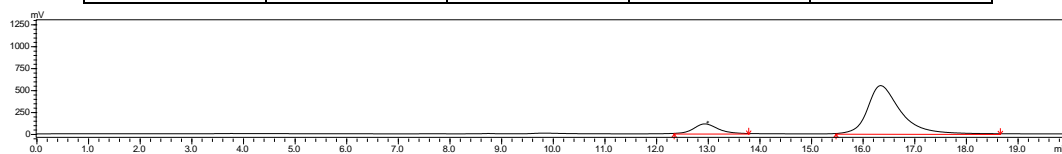

|   | Retention | Area     | High   | Area%  |
|---|-----------|----------|--------|--------|
| 1 | 12.944    | 3410076  | 108766 | 12.482 |
| 2 | 16.351    | 23910326 | 547223 | 87.518 |

**4c: (2'S,3R,3'R)-1-benzyl-2'-(2-(3,5-diphenyl-1H-pyrazol-1-yl)-2-oxoethyl)-2-oxo-3',6'-diphenyl-2',3'-dihydrospiro[indoline-3,4'-pyran]-5'-carbonitrile**

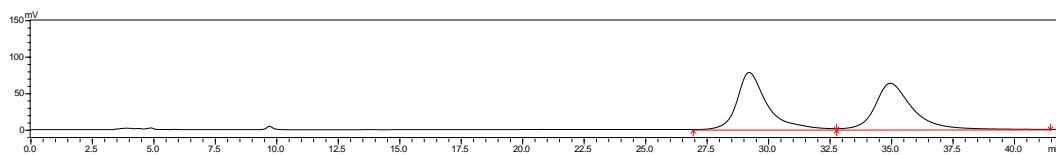

|   | Retention | Area    | High  | Area%  |
|---|-----------|---------|-------|--------|
| 1 | 29.233    | 6636547 | 78097 | 50.058 |
| 2 | 34.975    | 6621073 | 63192 | 49.942 |

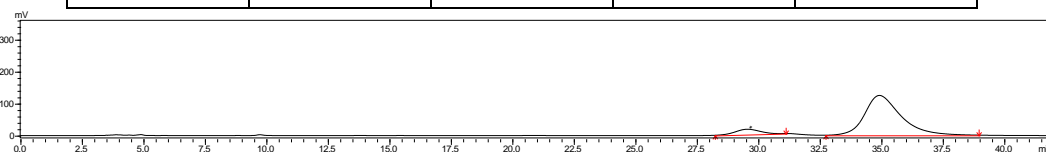

|   | Retention | Area     | High   | Area%  |
|---|-----------|----------|--------|--------|
| 1 | 29.564    | 1116007  | 16325  | 8.100  |
| 2 | 34.927    | 12661454 | 124242 | 91.900 |



**4d: (2'S,3R,3'R)-1-benzhydryl-2'-(2-(3,5-diphenyl-1H-pyrazol-1-yl)-2-oxoethyl)-5-methyl-2-oxo-3',6'-diphenyl-2',3'-dihydrospiro[indoline-3,4'-pyran]-5'-carbonitrile**

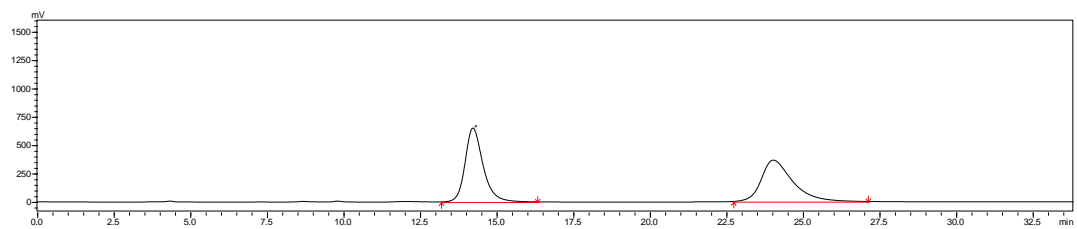

|   | Retention | Area     | High   | Area%  |
|---|-----------|----------|--------|--------|
| 1 | 14.229    | 26663200 | 651158 | 50.693 |
| 2 | 24.038    | 25934418 | 364584 | 49.307 |

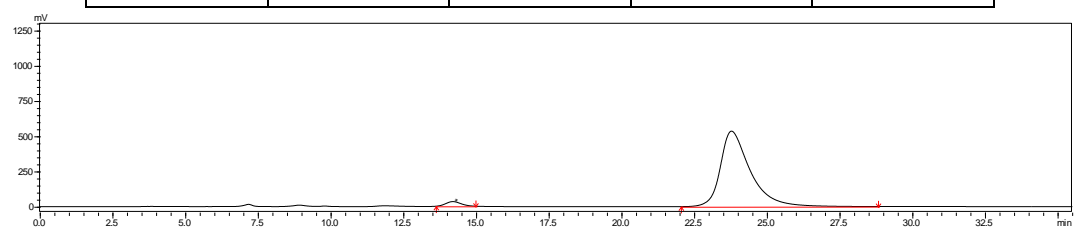

|   | Retention | Area     | High   | Area%  |
|---|-----------|----------|--------|--------|
| 1 | 14.208    | 1191222  | 32911  | 3.020  |
| 2 | 23.789    | 38258521 | 535395 | 96.980 |

**4e:(2'S,3R,3'R)-1-benzhydryl-5-bromo-2'-(2-(3,5-diphenyl-1H-pyrazol-1-yl)-2-oxoethyl)-2-oxo-3',6'-diphenyl-2',3'-dihydrospiro[indoline-3,4'-pyran]-5'-carbonitrile**

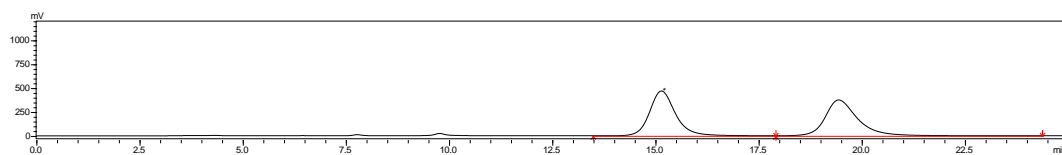

|   | Retention | Area     | High   | Area%  |
|---|-----------|----------|--------|--------|
| 1 | 15.149    | 20542941 | 469758 | 49.996 |
| 2 | 19.443    | 20546140 | 375548 | 50.004 |

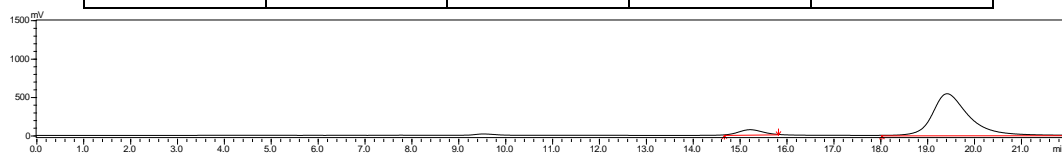

|   | Retention | Area     | High   | Area%  |
|---|-----------|----------|--------|--------|
| 1 | 15.225    | 2156490  | 64398  | 6.978  |
| 2 | 19.427    | 28746517 | 541617 | 93.022 |

**4f:(2'S,3R,3'R)-1-benzhydryl-7-chloro-2'-(2-(3,5-diphenyl-1H-pyrazol-1-yl)-2-oxoethyl)-2-oxo-3',6'-diphenyl-2',3'-dihydrospiro[indoline-3,4'-pyran]-5'-carbonitrile**

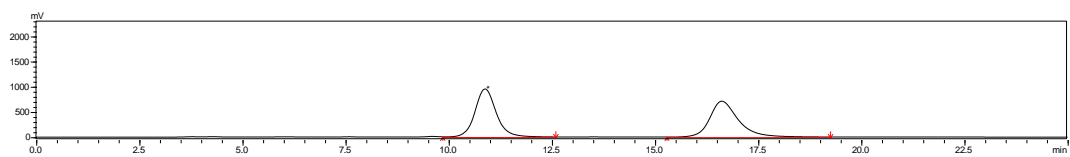

|   | Retention | Area     | High   | Area%  |
|---|-----------|----------|--------|--------|
| 1 | 10.881    | 33932631 | 950622 | 49.804 |
| 2 | 16.621    | 34199813 | 711114 | 50.196 |

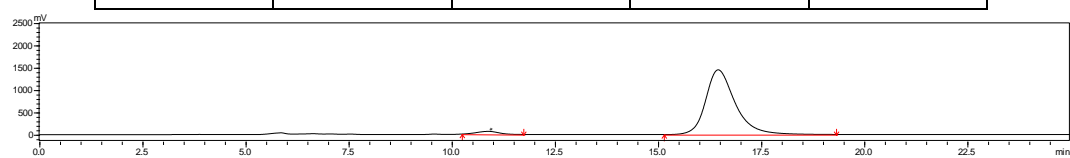

|   | Retention | Area     | High    | Area%  |
|---|-----------|----------|---------|--------|
| 1 | 10.884    | 2330347  | 63866   | 3.134  |
| 2 | 16.461    | 72020781 | 1449493 | 96.866 |

**4g:(2'S,3R,3'R)-1-benzhydryl-2'-(2-(3,5-diphenyl-1H-pyrazol-1-yl)-2-oxoethyl)-5,7-dimethyl-2-oxo-3',6'-diphenyl-2',3'-dihydrospiro[indoline-3,4'-pyran]-5'-carbonitrile**

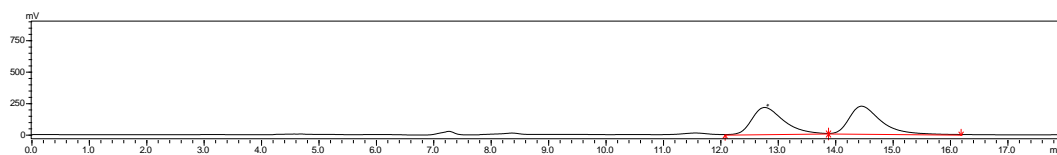

|   | Retention | Area    | High   | Area%  |
|---|-----------|---------|--------|--------|
| 1 | 12.773    | 7972650 | 211721 | 49.409 |
| 2 | 14.461    | 8163483 | 218487 | 50.591 |

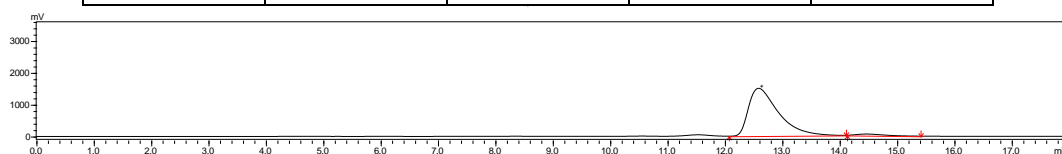

|   | Retention | Area     | High    | Area%  |
|---|-----------|----------|---------|--------|
| 1 | 12.588    | 53935039 | 1499736 | 97.528 |
| 2 | 14.470    | 1366914  | 45051   | 2.472  |

**4h: (2'S,3R,3'R)-1-benzhydryl-2'-(2-(3,5-diphenyl-1H-pyrazol-1-yl)-2-oxoethyl)-6'-(4-fluorophenyl)-2-oxo-3'-phenyl-2',3'-dihydrospiro[indoline-3,4'-pyran]-5'-carbonitrile**

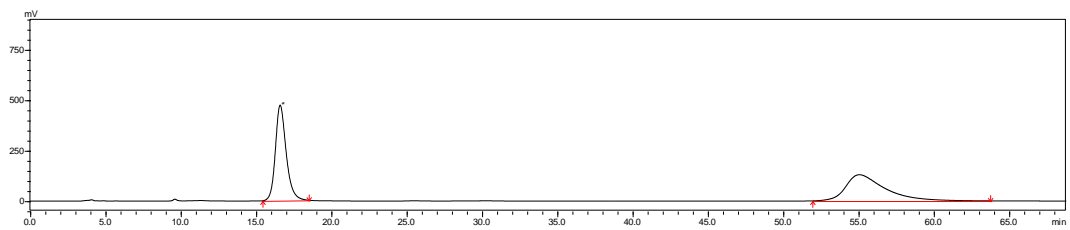

|   | Retention | Area     | High   | Area%  |
|---|-----------|----------|--------|--------|
| 1 | 16.603    | 23574287 | 473385 | 50.015 |
| 2 | 55.060    | 23560082 | 129728 | 49.985 |

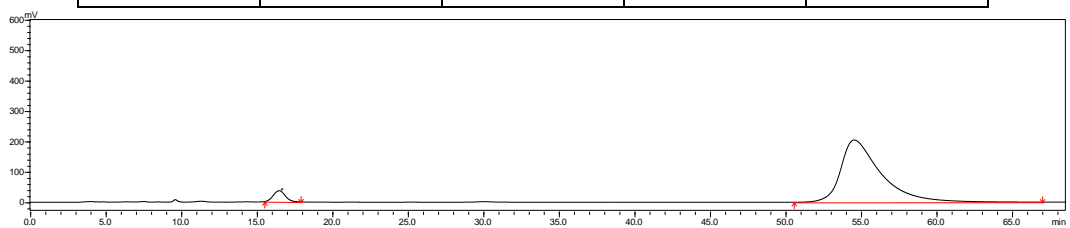

|   | Retention | Area     | High   | Area%  |
|---|-----------|----------|--------|--------|
| 1 | 16.495    | 2003571  | 36269  | 5.042  |
| 2 | 54.563    | 37732782 | 204430 | 94.958 |

**4i:(2'S,3R,3'R)-1-benzhydryl-6'-(4-chlorophenyl)-2'-(2-(3,5-diphenyl-1H-pyrazol-1-yl)-2-oxoethyl)-2-oxo-3'-phenyl-2',3'-dihydrospiro[indoline-3,4'-pyran]-5'-carbonitrile**

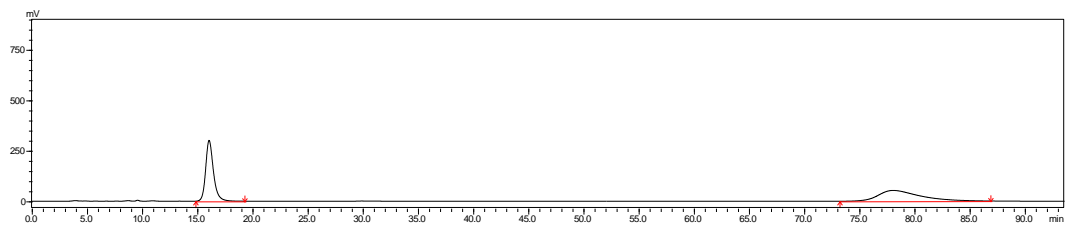

|   | Retention | Area     | High   | Area%  |
|---|-----------|----------|--------|--------|
| 1 | 16.078    | 14809720 | 301111 | 51.608 |
| 2 | 78.083    | 13886865 | 53120  | 48.392 |

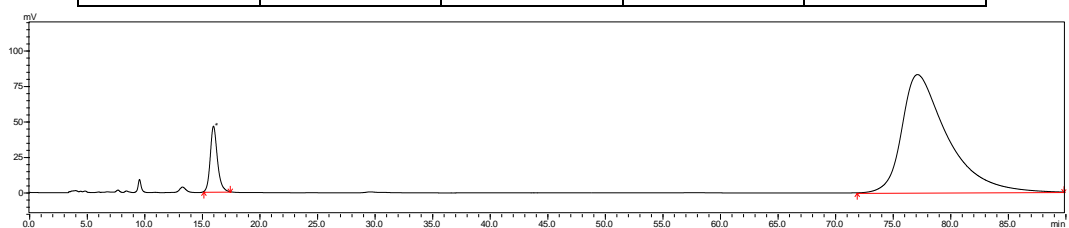

|   | Retention | Area     | High  | Area%  |
|---|-----------|----------|-------|--------|
| 1 | 16.017    | 1979595  | 46199 | 7.990  |
| 2 | 77.164    | 22797634 | 83129 | 92.010 |

**4j:(2'S,3R,3'R)-1-benzhydryl-6'-(4-bromophenyl)-2'-(2-(3,5-diphenyl-1H-pyrazol-1-yl)-2-oxoethyl)-2-oxo-3'-phenyl-2',3'-dihydrospiro[indoline-3,4'-pyran]-5'-carbonitrile**

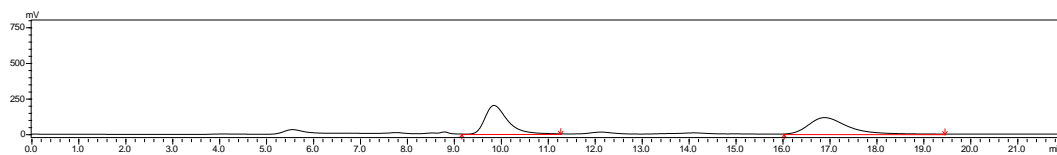

|   | Retention | Area    | High   | Area%  |
|---|-----------|---------|--------|--------|
| 1 | 9.857     | 6582026 | 200260 | 50.322 |
| 2 | 16.900    | 6497820 | 115142 | 49.678 |

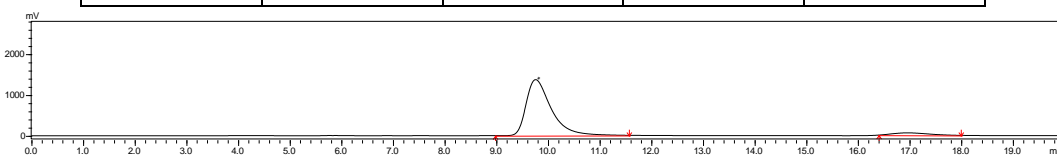

|   | Retention | Area     | High    | Area%  |
|---|-----------|----------|---------|--------|
| 1 | 9.764     | 46016997 | 1370728 | 94.483 |
| 2 | 16.967    | 2686995  | 56682   | 5.517  |

**4k:(2'S,3R,3'R)-1-benzhydryl-2'-(2-(3,5-diphenyl-1H-pyrazol-1-yl)-2-oxoethyl)-6'-(4-methoxyphenyl)-2-oxo-3'-phenyl-2',3'-dihydrospiro[indoline-3,4'-pyran]-5'-carbonitrile**

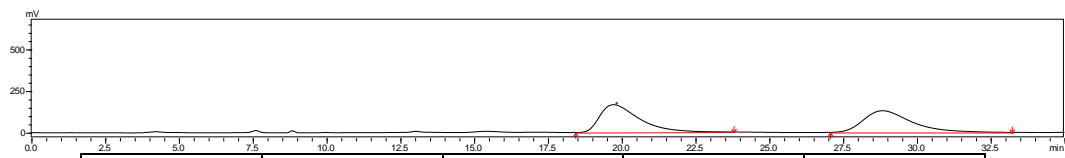

|   | Retention | Area     | High   | Area%  |
|---|-----------|----------|--------|--------|
| 1 | 19.723    | 15440271 | 166439 | 51.298 |
| 2 | 28.837    | 14659117 | 129701 | 48.702 |

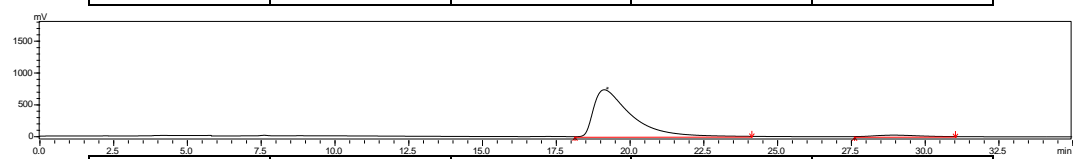

|   | Retention | Area     | High   | Area%  |
|---|-----------|----------|--------|--------|
| 1 | 19.145    | 64104388 | 736362 | 96.615 |
| 2 | 28.956    | 2246298  | 23236  | 3.385  |



**5:2-((2'S,3R,3'R)-1-benzhydryl-5'-cyano-2-oxo-3',6'-diphenyl-2',3'-dihydrospiro[indoline-3,4'-pyran]-2'-yl)-N-benzylacetamide**

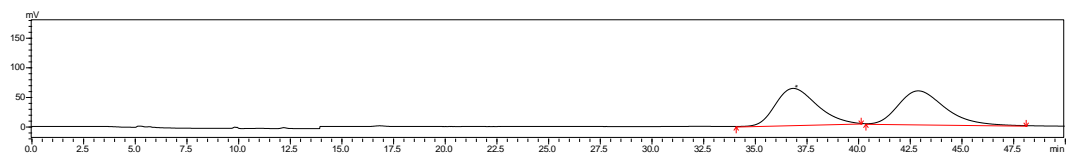

|   | Retention | Area    | High  | Area%  |
|---|-----------|---------|-------|--------|
| 1 | 36.866    | 8535198 | 61886 | 49.373 |
| 2 | 42.912    | 8752144 | 56580 | 50.627 |

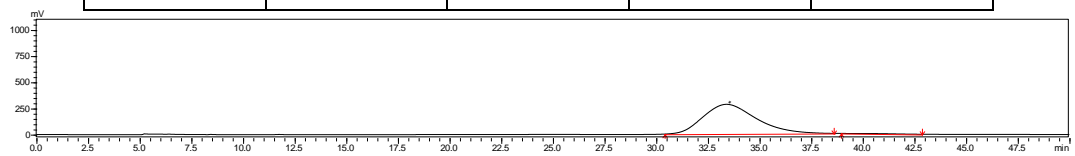

|   | Retention | Area     | High   | Area%  |
|---|-----------|----------|--------|--------|
| 1 | 33.406    | 49987784 | 281625 | 99.596 |
| 2 | 38.946    | 202530   | 8      | 0.404  |

**6:(2'S,3R,3'R)-1-benzhydryl-2'-(2-hydroxyethyl)-2-oxo-3',6'-diphenyl-2',3'-dihydrospiro[indoline-3,4'-pyran]-5'-carbonitrile**

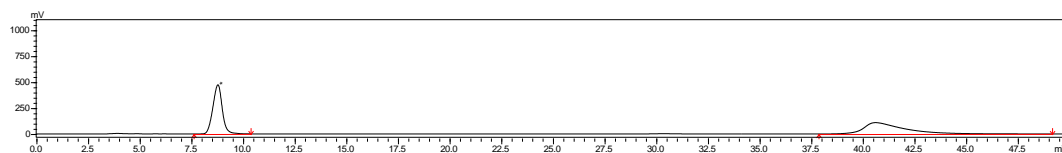

|   | Retention | Area     | High   | Area%  |
|---|-----------|----------|--------|--------|
| 1 | 8.790     | 14954825 | 473677 | 50.171 |
| 2 | 40.621    | 14852918 | 109155 | 49.829 |

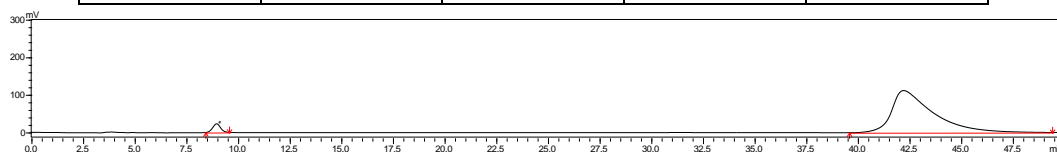

|   | Retention | Area     | High   | Area%  |
|---|-----------|----------|--------|--------|
| 1 | 8.790     | 609198   | 22991  | 3.744  |
| 2 | 42.218    | 15661874 | 111958 | 96.256 |
